# Supplementary material
Source: MDPI journal article supplement (https://www.mdpi.com/2311-7524/8/2/183)
Supplement: s1 [file s1]

Archive with 2 entries (2 files):
- Supplementary Figures.pdf
- Tables-Supplementary.pdf
