# Supplementary material
Source: MDPI journal article supplement (https://www.mdpi.com/2311-7524/8/2/183)
Supplement: s1 [file s1 › Supplementary Figures.pdf]

## Supplemental Materials

### Figures

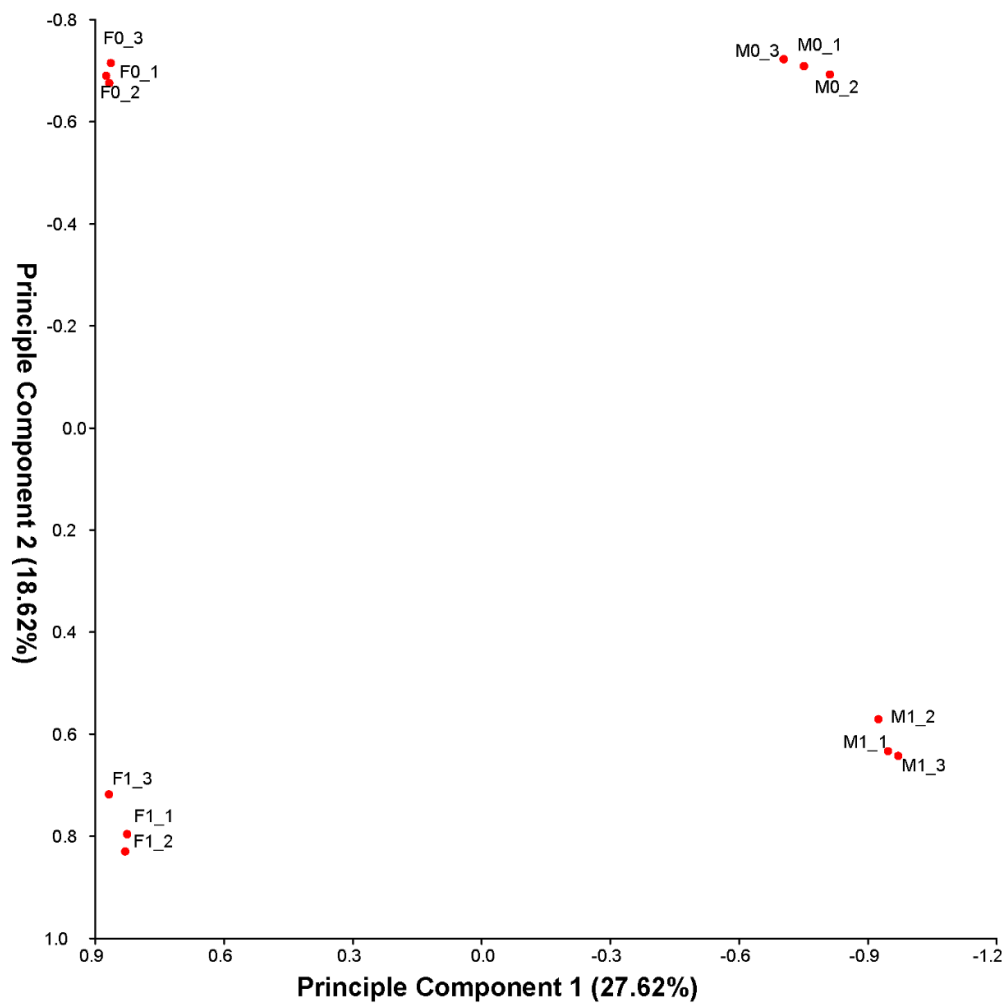

**Figure S1.** Principal component analysis (PCA) of red bayberry floral buds.

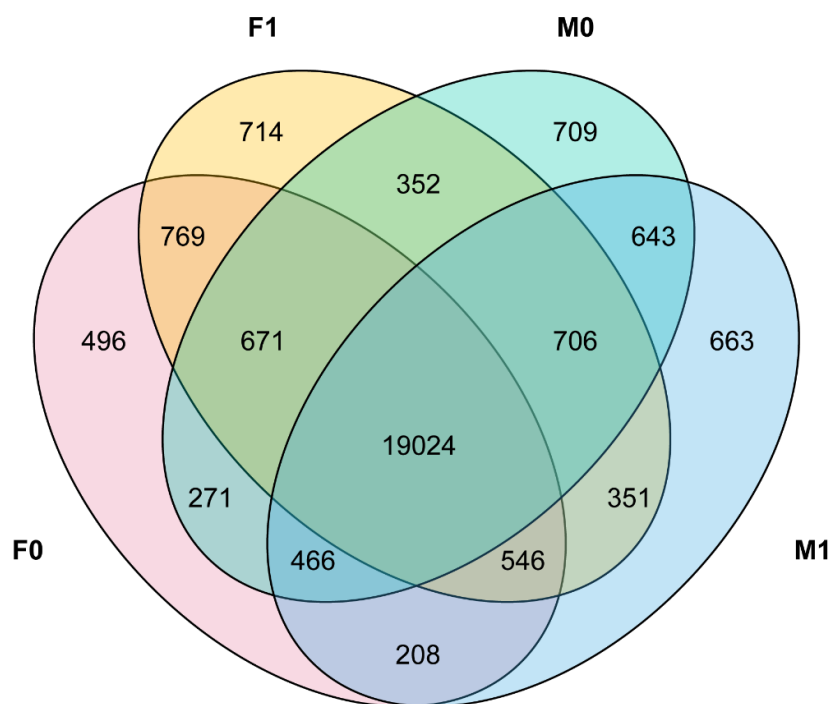

**Figure S2.** Venn diagram of the 8,889 DEGs in the pair-wise F1 vs F0, M1 vs. M0, M0 vs. F0, and M1 vs. F1.

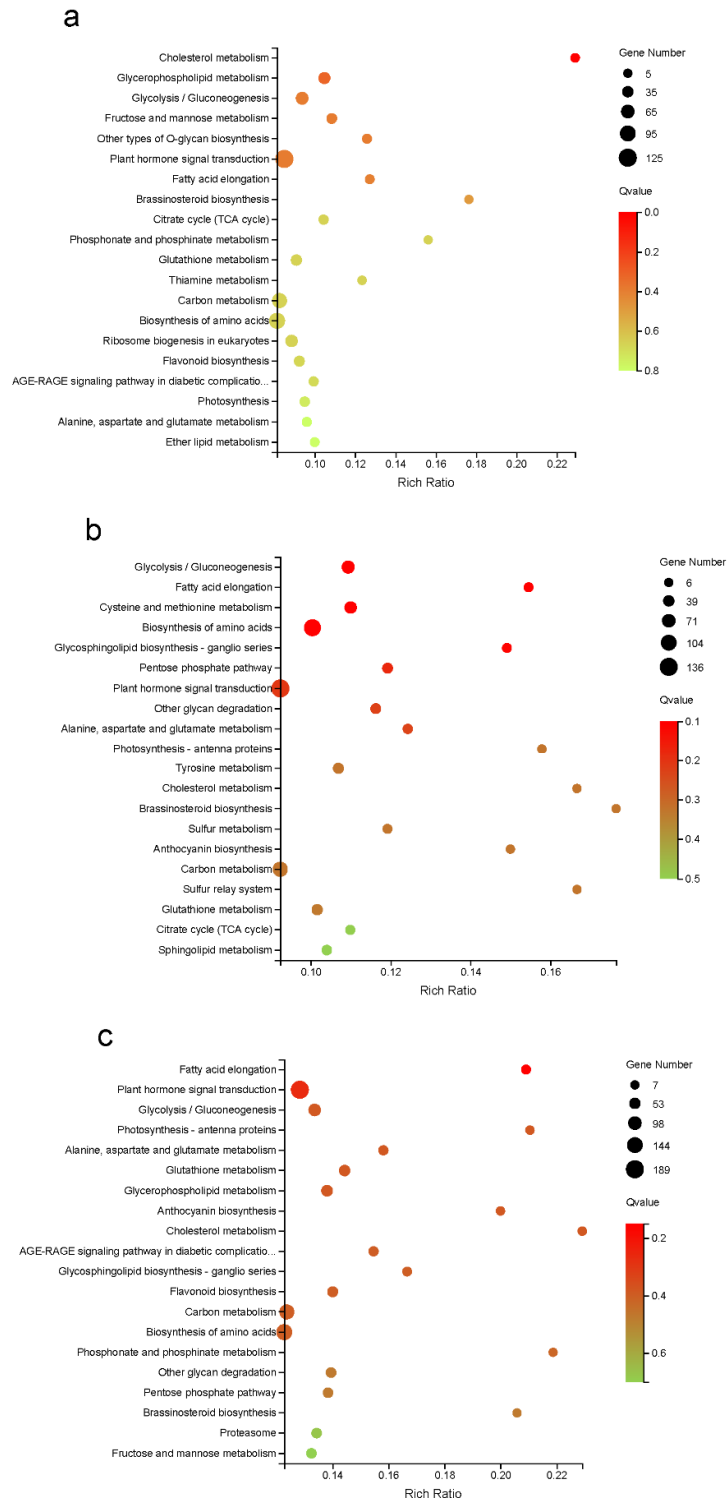

**Figure S3.** KEGG pathway enrichment analysis of the DEGs in M0 vs. F0 (a), M1 vs. F1 (b), and all the 7,029 DEGs in the pair-wise M0 vs. F0, and M1 vs. F1 comparisons (c).

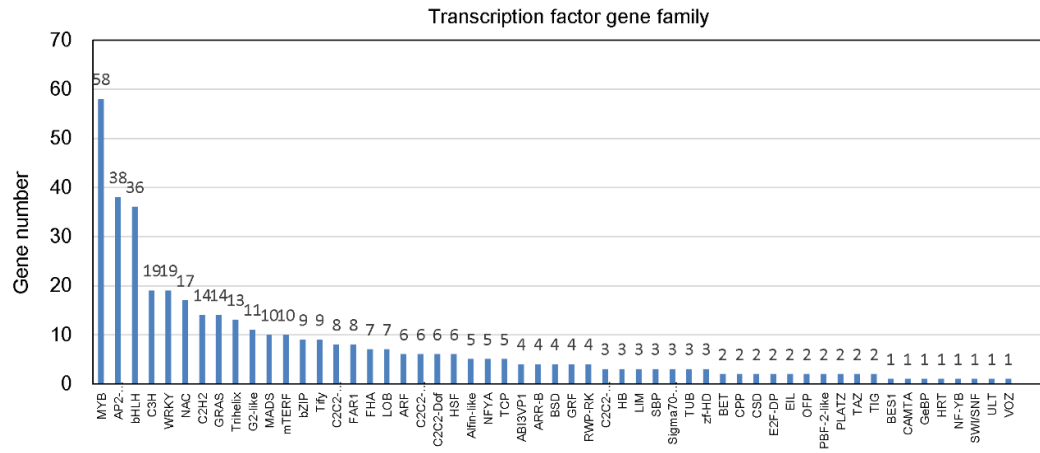

**Figure S4.** Distribution of the 547 415 transcription factors genes in 8889 7029 DEGs.

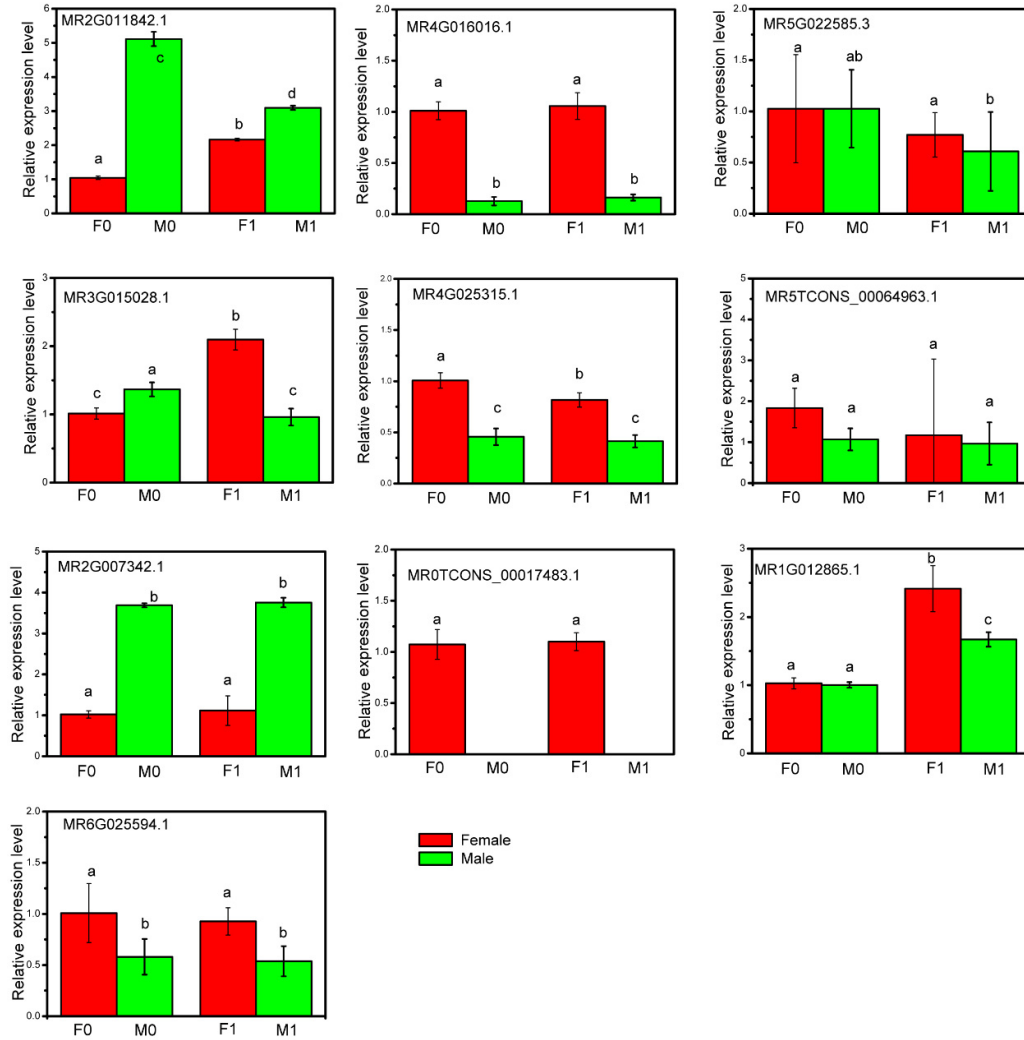

**Figure S5. Validation of the expression patterns of ten DEGs by qRT-PCR.** Capital letters above the black bars represent significant differences between the samples, Values are mean  $\pm$  SE (n = 3).
