# Supplementary material
Source: MDPI journal article supplement (https://www.mdpi.com/2311-7524/8/2/183)
Supplement: s1 [file s1 › Tables-Supplementary.pdf]

## Supplemental Materials

### Tables

**Table S1.** Raw data of sequencing sample in study.

| sample_<br>name | total_raw_re<br>ad (M) | total_clean_r<br>ead (M) | total_clean_b<br>ase (Gb) | clean_read_r<br>atio (%) | Total Mapping to<br>genome (%) | Total Mapping to<br>gene (%) |
|-----------------|------------------------|--------------------------|---------------------------|--------------------------|--------------------------------|------------------------------|
| F0_1            | 46.2                   | 42.21                    | 6.33                      | 91.38                    | 82.06                          | 71.23                        |
| F0_2            | 46.2                   | 42.47                    | 6.37                      | 91.94                    | 81.93                          | 71.81                        |
| F0_3            | 46.2                   | 42.67                    | 6.4                       | 92.36                    | 81.8                           | 71.48                        |
| F1_1            | 47.79                  | 43.11                    | 6.47                      | 90.2                     | 82.54                          | 71.73                        |
| F1_2            | 47.79                  | 42.16                    | 6.32                      | 88.23                    | 81.9                           | 70.16                        |
| F1_3            | 47.79                  | 42.47                    | 6.37                      | 88.87                    | 80.48                          | 69.12                        |
| M0_1            | 47.79                  | 43.36                    | 6.5                       | 90.74                    | 83.85                          | 71.82                        |
| M0_2            | 46.2                   | 42.31                    | 6.35                      | 91.58                    | 84.24                          | 71.91                        |
| M0_3            | 47.79                  | 43.4                     | 6.51                      | 90.81                    | 84.74                          | 72.96                        |
| M1_1            | 46.2                   | 42.42                    | 6.36                      | 91.82                    | 85.76                          | 74.32                        |
| M1_2            | 46.2                   | 42.71                    | 6.41                      | 92.44                    | 86.29                          | 74.24                        |
| M1_3            | 46.2                   | 42.41                    | 6.36                      | 91.81                    | 85.11                          | 72.93                        |

**Table S2.** Level 2 Gene Ontology annotation of highly expression genes in four floral buds.

| Term type          | Term type level 2 | GO Term                                         | F0             |        |       | F1             |        |       | M0             |        |       | M1             |        |       |
|--------------------|-------------------|-------------------------------------------------|----------------|--------|-------|----------------|--------|-------|----------------|--------|-------|----------------|--------|-------|
|                    |                   |                                                 | Term Candidate | Rich   | P     |
|                    |                   |                                                 | Gene Num       | Ratio  | value |
| biological_process | cellular process  | amide biosynthetic process                      | 67             | 0.0718 | 8.13E | 66             | 0.0707 | 3.56E | 59             | 0.0632 | 1.12E | 41             | 0.0439 | 1.04E |
|                    |                   |                                                 |                | 11     | -26   |                | 4      | -23   |                | 37     | -24   |                | 44     | -11   |
|                    | cellular process  | cellular amide metabolic process                | 70             | 0.0669 | 3.10E | 71             | 0.0679 | 5.58E | 64             | 0.0612 | 3.83E | 46             | 0.0440 | 3.97E |
|                    |                   |                                                 |                | 86     | -25   |                | 43     | -24   |                | 44     | -26   |                | 19     | -13   |
|                    | cellular process  | translation                                     | 64             | 0.0724 | 8.00E | 63             | 0.0713 | 2.80E | 56             | 0.0634 | 2.04E | 38             | 0.0430 | 1.25E |
|                    |                   |                                                 |                | 8      | -25   |                | 48     | -22   |                | 2      | -23   |                | 35     | -10   |
|                    | cellular process  | peptide metabolic process                       | 67             | 0.0687 | 9.61E | 68             | 0.0698 | 1.39E | 61             | 0.0626 | 2.41E | 43             | 0.0441 | 2.49E |
|                    |                   |                                                 |                | 89     | -25   |                | 15     | -23   |                | 28     | -25   |                | 48     | -12   |
|                    | cellular process  | peptide biosynthetic process                    | 64             | 0.0711 | 2.15E | 63             | 0.0700 | 7.22E | 38             | 0.0422 | 2.10E | 56             | 0.0622 | 4.90E |
|                    |                   |                                                 |                | 9      | -24   |                | 78     | -22   |                | 69     | -10   |                | 91     | -23   |
|                    | metabolic process | organonitrogen compound biosynthetic process    | 85             | 0.0463 | 4.10E | 83             | 0.0452 | 7.65E | 74             | 0.0403 | 1.89E | 55             | 0.0299 | 4.32E |
|                    |                   |                                                 |                | 47     | -20   |                | 56     | -17   |                | 49     | -19   |                | 89     | -09   |
|                    | cellular process  | cellular nitrogen compound biosynthetic process | 95             | 0.0382 | 6.07E | 95             | 0.0382 | 1.12E | 79             | 0.0317 | 8.78E | 65             | 0.0261 | 2.56E |
|                    |                   |                                                 |                | 14     | -17   |                | 14     | -14   |                | 78     | -15   |                | 46     | -08   |
|                    | metabolic process | organic substance biosynthetic process          | 121            | 0.0305 | 1.19E | 122            | 0.0308 | 2.36E | 102            | 0.0257 | 1.28E |                |        |       |
|                    |                   |                                                 |                | 56     | -14   |                | 08     | -12   |                | 58     | -13   |                |        |       |
| cellular_component | metabolic process | biosynthetic process                            | 124            | 0.0293 | 1.10E |                |        |       | 104            | 0.0245 | 1.42E |                |        |       |
|                    |                   |                                                 |                | 01     | -13   |                |        |       |                | 75     | -12   |                |        |       |
|                    | cellular process  | cellular biosynthetic process                   |                |        |       |                |        |       | 101            | 0.0257 | 1.82E |                |        |       |
|                    |                   |                                                 |                |        |       |                |        |       |                | 78     | -13   |                |        |       |
|                    | metabolic process | organonitrogen compound metabolic process       |                |        |       |                |        |       |                |        |       | 85             | 0.0230 | 2.57E |
|                    |                   |                                                 |                |        |       |                |        |       |                |        |       |                | 1      | -08   |
|                    | cell              | ribosome                                        | 62             | 0.0867 | 5.62E | 62             | 0.0867 | 5.81E | 55             | 0.0769 | 2.72E | 38             | 0.0531 | 3.70E |
|                    |                   |                                                 |                | 13     | -32   |                | 13     | -30   |                | 23     | -30   |                | 47     | -15   |
|                    | cell part         | intracellular ribonucleoprotein complex         | 69             | 0.0601 | 5.38E | 67             | 0.0583 | 1.86E | 61             | 0.0531 | 5.96E | 42             | 0.0365 | 2.99E |
|                    |                   |                                                 |                | 05     | -26   |                | 62     | -22   |                | 36     | -25   |                | 85     | -11   |

|                    |                              |                                              |    |          |          |     |          |          |    |          |          |    |          |          |
|--------------------|------------------------------|----------------------------------------------|----|----------|----------|-----|----------|----------|----|----------|----------|----|----------|----------|
| molecular_function | organelle                    | non-membrane-bounded organelle               | 83 | 0.049701 | 5.67E-26 | 85  | 0.050898 | 8.37E-25 | 74 | 0.044311 | 9.15E-26 | 56 | 0.033533 | 2.29E-13 |
|                    |                              | intracellular non-membrane-bounded organelle | 83 | 0.049701 | 5.67E-26 | 85  | 0.050898 | 8.37E-25 | 74 | 0.044311 | 9.15E-26 | 56 | 0.033533 | 2.29E-13 |
|                    | macromolecular complex       | ribonucleoprotein complex                    | 69 | 0.060105 | 5.38E-26 | 61  | 0.053136 | 5.96E-25 | 42 | 0.036585 | 2.99E-11 | 67 | 0.058362 | 1.86E-22 |
|                    |                              | ribosomal subunit                            | 29 | 0.128889 | 8.05E-20 | 26  | 0.115556 | 7.10E-16 | 24 | 0.106667 | 1.23E-16 | 17 | 0.075556 | 1.31E-09 |
|                    | macromolecular complex       | macromolecular complex                       | 99 | 0.032534 | 1.33E-17 | 107 | 0.035163 | 5.62E-19 | 85 | 0.027933 | 1.23E-16 | 73 | 0.023989 | 2.88E-10 |
|                    |                              | cytosolic ribosome                           | 19 | 0.188119 | 1.69E-16 | 16  | 0.158416 | 2.30E-12 | 15 | 0.148515 | 5.94E-13 |    |          |          |
|                    | cell                         | cytosolic part                               | 20 | 0.15873  | 8.49E-16 | 17  | 0.134921 | 6.84E-12 |    |          |          |    |          |          |
|                    |                              | nucleosome                                   |    |          |          |     |          |          |    |          |          | 11 | 0.1375   | 2.24E-09 |
|                    | macromolecular complex       | DNA packaging complex                        |    |          |          |     |          |          |    |          |          | 11 | 0.11828  | 1.14E-08 |
|                    |                              | protein-DNA complex                          |    |          |          |     |          |          |    |          |          | 11 | 0.11     | 2.47E-08 |
|                    | structural molecule activity | structural constituent of ribosome           | 61 | 0.094281 | 2.81E-32 | 62  | 0.095827 | 4.81E-31 | 54 | 0.083462 | 2.70E-30 | 38 | 0.058733 | 7.46E-16 |
|                    |                              | structural molecule activity                 | 65 | 0.082383 | 5.94E-31 | 67  | 0.084918 | 2.12E-30 | 56 | 0.070976 | 8.00E-28 | 40 | 0.050697 | 1.64E-14 |

**Table S3.** KEGG enrichment analysis of highly expressed genes in four floral buds

| Pathway ID | Pathway Name                                | Level 1                        | Level 2                                     | Term Candidate Gene Num | Total Candidate Gene Num | Term Gene Num | Total Gene Num | Rich Ratio   | P value      | Q value      |
|------------|---------------------------------------------|--------------------------------|---------------------------------------------|-------------------------|--------------------------|---------------|----------------|--------------|--------------|--------------|
| ko03010    | Ribosome                                    | Genetic Information Processing | Translation                                 | 68                      | 364                      | 1200          | 27882          | 0.05666<br>7 | 7.45E-<br>25 | 7.82E-<br>23 |
| ko00941    | Flavonoid biosynthesis                      | Metabolism                     | Biosynthesis of other secondary metabolites | 11                      | 364                      | 314           | 27882          | 0.03503<br>2 | 0.0029<br>84 | 0.1566<br>64 |
| ko04145    | Phagosome                                   | Cellular Processes             | Transport and catabolism                    | 11                      | 364                      | 342           | 27882          | 0.03216<br>4 | 0.0056<br>32 | 0.1971<br>28 |
| ko00250    | Alanine, aspartate and glutamate metabolism | Metabolism                     | Amino acid metabolism                       | 6                       | 364                      | 177           | 27882          | 0.03389<br>8 | 0.0291<br>41 | 0.3399<br>79 |
| ko00270    | Cysteine and methionine metabolism          | Metabolism                     | Amino acid metabolism                       | 13                      | 364                      | 491           | 27882          | 0.02647<br>7 | 0.0130<br>95 | 0.3399<br>79 |
| ko00480    | Glutathione metabolism                      | Metabolism                     | Metabolism of other amino acids             | 10                      | 364                      | 374           | 27882          | 0.02673<br>8 | 0.0259<br>89 | 0.3399<br>79 |
| ko00630    | Glyoxylate and dicarboxylate metabolism     | Metabolism                     | Carbohydrate metabolism                     | 8                       | 364                      | 275           | 27882          | 0.02909<br>1 | 0.0287<br>38 | 0.3399<br>79 |
| ko00710    | Carbon fixation in photosynthetic organisms | Metabolism                     | Energy metabolism                           | 7                       | 364                      | 225           | 27882          | 0.03111<br>1 | 0.0289<br>28 | 0.3399<br>79 |
| ko00944    | Flavone and flavonol biosynthesis           | Metabolism                     | Biosynthesis of other secondary metabolites | 2                       | 364                      | 18            | 27882          | 0.11111<br>1 | 0.0226<br>54 | 0.3399<br>79 |
| ko00591    | Linoleic acid metabolism                    | Metabolism                     | Lipid metabolism                            | 6                       | 364                      | 198           | 27882          | 0.03030<br>3 | 0.0461<br>67 | 0.4462<br>24 |
| ko00592    | alpha-Linolenic acid metabolism             | Metabolism                     | Lipid metabolism                            | 8                       | 364                      | 309           | 27882          | 0.02589      | 0.0509<br>97 | 0.4462<br>24 |
| ko00910    | Nitrogen metabolism                         | Metabolism                     | Energy metabolism                           | 5                       | 364                      | 153           | 27882          | 0.03268      | 0.0507<br>44 | 0.4462<br>24 |
| ko00195    | Photosynthesis                              | Metabolism                     | Energy metabolism                           | 6                       | 364                      | 221           | 27882          | 0.02714<br>9 | 0.0707<br>1  | 0.5039<br>31 |
| ko01200    | Carbon metabolism                           | Metabolism                     | Global and overview maps                    | 19                      | 364                      | 1018          | 27882          | 0.01866<br>4 | 0.0767<br>89 | 0.5039<br>31 |

|         |                                             |                                      |                                             |    |     |      |       |              |              |              |
|---------|---------------------------------------------|--------------------------------------|---------------------------------------------|----|-----|------|-------|--------------|--------------|--------------|
| ko01230 | Biosynthesis of amino acids                 | Metabolism                           | Global and overview maps                    | 22 | 364 | 1205 | 27882 | 0.01825<br>7 | 0.0724<br>11 | 0.5039<br>31 |
| ko04075 | Plant hormone signal transduction           | Environmental Information Processing | Signal transduction                         | 26 | 364 | 1472 | 27882 | 0.01766<br>3 | 0.0737<br>4  | 0.5039<br>31 |
| ko00290 | Valine, leucine and isoleucine biosynthesis | Metabolism                           | Amino acid metabolism                       | 4  | 364 | 129  | 27882 | 0.03100<br>8 | 0.0890<br>89 | 0.5502<br>58 |
| ko00660 | C5-Branched dibasic acid metabolism         | Metabolism                           | Carbohydrate metabolism                     | 2  | 364 | 55   | 27882 | 0.03636<br>4 | 0.1613<br>34 | 0.8915<br>83 |
| ko00900 | Terpenoid backbone biosynthesis             | Metabolism                           | Metabolism of terpenoids and polyketides    | 5  | 364 | 217  | 27882 | 0.02304<br>1 | 0.1555<br>43 | 0.8915<br>83 |
| ko03010 | Ribosome                                    | Genetic Information Processing       | Translation                                 | 68 | 415 | 1200 | 27882 | 0.05666<br>7 | 1.62E-<br>21 | 1.76E-<br>19 |
| ko00480 | Glutathione metabolism                      | Metabolism                           | Metabolism of other amino acids             | 18 | 415 | 374  | 27882 | 0.04812<br>8 | 1.50E-<br>05 | 0.0008<br>19 |
| ko00195 | Photosynthesis                              | Metabolism                           | Energy metabolism                           | 11 | 415 | 221  | 27882 | 0.04977<br>4 | 0.0005<br>13 | 0.0183<br>72 |
| ko04145 | Phagosome                                   | Cellular Processes                   | Transport and catabolism                    | 14 | 415 | 342  | 27882 | 0.04093<br>6 | 0.0006<br>74 | 0.0183<br>72 |
| ko00941 | Flavonoid biosynthesis                      | Metabolism                           | Biosynthesis of other secondary metabolites | 13 | 415 | 314  | 27882 | 0.04140<br>1 | 0.0009<br>36 | 0.0204<br>04 |
| ko00196 | Photosynthesis - antenna proteins           | Metabolism                           | Energy metabolism                           | 5  | 415 | 57   | 27882 | 0.08771<br>9 | 0.0015<br>82 | 0.0287<br>34 |
| ko00250 | Alanine, aspartate and glutamate metabolism | Metabolism                           | Amino acid metabolism                       | 7  | 415 | 177  | 27882 | 0.03954<br>8 | 0.0171<br>16 | 0.2665<br>25 |
| ko00710 | Carbon fixation in photosynthetic organisms | Metabolism                           | Energy metabolism                           | 8  | 415 | 225  | 27882 | 0.03555<br>6 | 0.0199<br>8  | 0.2722<br>3  |
| ko00944 | Flavone and flavonol biosynthesis           | Metabolism                           | Biosynthesis of other secondary metabolites | 2  | 415 | 18   | 27882 | 0.11111<br>1 | 0.0288<br>92 | 0.3499<br>19 |
| ko00270 | Cysteine and methionine metabolism          | Metabolism                           | Amino acid metabolism                       | 13 | 415 | 491  | 27882 | 0.02647<br>7 | 0.0335<br>89 | 0.3661<br>22 |
| ko00010 | Glycolysis / Gluconeogenesis                | Metabolism                           | Carbohydrate metabolism                     | 14 | 415 | 576  | 27882 | 0.02430<br>6 | 0.0511<br>37 | 0.5067<br>19 |

|         |                                             |                                |                                             |    |     |      |       |              |              |              |
|---------|---------------------------------------------|--------------------------------|---------------------------------------------|----|-----|------|-------|--------------|--------------|--------------|
| ko01200 | Carbon metabolism                           | Metabolism                     | Global and overview maps                    | 21 | 415 | 1018 | 27882 | 0.02062<br>9 | 0.0839<br>6  | 0.6872<br>69 |
| ko01230 | Biosynthesis of amino acids                 | Metabolism                     | Global and overview maps                    | 24 | 415 | 1205 | 27882 | 0.01991<br>7 | 0.0918<br>86 | 0.6872<br>69 |
| ko03050 | Proteasome                                  | Genetic Information Processing | Folding, sorting and degradation            | 7  | 415 | 253  | 27882 | 0.02766<br>8 | 0.0852<br>43 | 0.6872<br>69 |
| ko04146 | Peroxisome                                  | Cellular Processes             | Transport and catabolism                    | 10 | 415 | 416  | 27882 | 0.02403<br>8 | 0.0945<br>78 | 0.6872<br>69 |
| ko00190 | Oxidative phosphorylation                   | Metabolism                     | Energy metabolism                           | 12 | 415 | 531  | 27882 | 0.02259<br>9 | 0.1013<br>94 | 0.6907<br>44 |
| ko00290 | Valine, leucine and isoleucine biosynthesis | Metabolism                     | Amino acid metabolism                       | 4  | 415 | 129  | 27882 | 0.03100<br>8 | 0.1268<br>99 | 0.7684<br>44 |
| ko00020 | Citrate cycle (TCA cycle)                   | Metabolism                     | Carbohydrate metabolism                     | 5  | 415 | 182  | 27882 | 0.02747<br>3 | 0.1363<br>28 | 0.7820<br>93 |
| ko00051 | Fructose and mannose metabolism             | Metabolism                     | Carbohydrate metabolism                     | 6  | 415 | 249  | 27882 | 0.02409<br>6 | 0.1685<br>52 | 0.8889<br>5  |
| ko00591 | Linoleic acid metabolism                    | Metabolism                     | Lipid metabolism                            | 5  | 415 | 198  | 27882 | 0.02525<br>3 | 0.1739<br>8  | 0.8889<br>5  |
| ko03010 | Ribosome                                    | Genetic Information Processing | Translation                                 | 60 | 311 | 1200 | 27882 | 0.05         | 8.12E-<br>23 | 7.79E-<br>21 |
| ko00591 | Linoleic acid metabolism                    | Metabolism                     | Lipid metabolism                            | 7  | 311 | 198  | 27882 | 0.03535<br>4 | 0.0070<br>11 | 0.2243<br>51 |
| ko04145 | Phagosome                                   | Cellular Processes             | Transport and catabolism                    | 10 | 311 | 342  | 27882 | 0.02924      | 0.0053<br>39 | 0.2243<br>51 |
| ko00480 | Glutathione metabolism                      | Metabolism                     | Metabolism of other amino acids             | 10 | 311 | 374  | 27882 | 0.02673<br>8 | 0.0097<br>15 | 0.2331<br>63 |
| ko00250 | Alanine, aspartate and glutamate metabolism | Metabolism                     | Amino acid metabolism                       | 6  | 311 | 177  | 27882 | 0.03389<br>8 | 0.0147<br>44 | 0.2698<br>49 |
| ko00944 | Flavone and flavonol biosynthesis           | Metabolism                     | Biosynthesis of other secondary metabolites | 2  | 311 | 18   | 27882 | 0.11111<br>1 | 0.0168<br>66 | 0.2698<br>49 |
| ko00910 | Nitrogen metabolism                         | Metabolism                     | Energy metabolism                           | 5  | 311 | 153  | 27882 | 0.03268      | 0.0288<br>14 | 0.3457<br>71 |

|         |                                          |                                |                                             |    |     |      |       |              |              |              |
|---------|------------------------------------------|--------------------------------|---------------------------------------------|----|-----|------|-------|--------------|--------------|--------------|
| ko00941 | Flavonoid biosynthesis                   | Metabolism                     | Biosynthesis of other secondary metabolites | 8  | 311 | 314  | 27882 | 0.02547<br>8 | 0.0253<br>29 | 0.3457<br>71 |
| ko00270 | Cysteine and methionine metabolism       | Metabolism                     | Amino acid metabolism                       | 10 | 311 | 491  | 27882 | 0.02036<br>7 | 0.0499<br>88 | 0.5332<br>09 |
| ko03050 | Proteasome                               | Genetic Information Processing | Folding, sorting and degradation            | 6  | 311 | 253  | 27882 | 0.02371<br>5 | 0.0650<br>84 | 0.6248<br>02 |
| ko00190 | Oxidative phosphorylation                | Metabolism                     | Energy metabolism                           | 10 | 311 | 531  | 27882 | 0.01883<br>2 | 0.0756<br>23 | 0.6599<br>8  |
| ko00900 | Terpenoid backbone biosynthesis          | Metabolism                     | Metabolism of terpenoids and polyketides    | 5  | 311 | 217  | 27882 | 0.02304<br>1 | 0.0965<br>34 | 0.7722<br>7  |
| ko00592 | alpha-Linolenic acid metabolism          | Metabolism                     | Lipid metabolism                            | 6  | 311 | 309  | 27882 | 0.01941<br>7 | 0.1331<br>59 | 0.9833<br>24 |
| ko00010 | Glycolysis / Gluconeogenesis             | Metabolism                     | Carbohydrate metabolism                     | 6  | 311 | 576  | 27882 | 0.01041<br>7 | 0.6233<br>1  | 0.9997<br>51 |
| ko00020 | Citrate cycle (TCA cycle)                | Metabolism                     | Carbohydrate metabolism                     | 1  | 311 | 182  | 27882 | 0.00549<br>5 | 0.8710<br>27 | 0.9997<br>51 |
| ko00030 | Pentose phosphate pathway                | Metabolism                     | Carbohydrate metabolism                     | 1  | 311 | 260  | 27882 | 0.00384<br>6 | 0.9466<br>07 | 0.9997<br>51 |
| ko00040 | Pentose and glucuronate interconversions | Metabolism                     | Carbohydrate metabolism                     | 3  | 311 | 807  | 27882 | 0.00371<br>7 | 0.9944<br>53 | 0.9997<br>51 |
| ko00051 | Fructose and mannose metabolism          | Metabolism                     | Carbohydrate metabolism                     | 1  | 311 | 249  | 27882 | 0.00401<br>6 | 0.9395<br>27 | 0.9997<br>51 |
| ko00053 | Ascorbate and aldarate metabolism        | Metabolism                     | Carbohydrate metabolism                     | 3  | 311 | 514  | 27882 | 0.00583<br>7 | 0.9279<br>41 | 0.9997<br>51 |
| ko00071 | Fatty acid degradation                   | Metabolism                     | Lipid metabolism                            | 1  | 311 | 228  | 27882 | 0.00438<br>6 | 0.9233<br>08 | 0.9997<br>51 |
| ko03010 | Ribosome                                 | Genetic Information Processing | Translation                                 | 44 | 329 | 1200 | 27882 | 0.03666<br>7 | 2.78E-<br>11 | 2.78E-<br>09 |
| ko00195 | Photosynthesis                           | Metabolism                     | Energy metabolism                           | 10 | 329 | 221  | 27882 | 0.04524<br>9 | 0.0003<br>18 | 0.0158<br>87 |
| ko00480 | Glutathione metabolism                   | Metabolism                     | Metabolism of other amino acids             | 12 | 329 | 374  | 27882 | 0.03208<br>6 | 0.0017<br>6  | 0.0586<br>73 |

|         |                                             |                                |                                             |    |     |      |       |              |              |              |
|---------|---------------------------------------------|--------------------------------|---------------------------------------------|----|-----|------|-------|--------------|--------------|--------------|
| ko00196 | Photosynthesis - antenna proteins           | Metabolism                     | Energy metabolism                           | 4  | 329 | 57   | 27882 | 0.07017<br>5 | 0.0045<br>99 | 0.1149<br>81 |
| ko00250 | Alanine, aspartate and glutamate metabolism | Metabolism                     | Amino acid metabolism                       | 6  | 329 | 177  | 27882 | 0.03389<br>8 | 0.0189<br>01 | 0.2331<br>64 |
| ko00270 | Cysteine and methionine metabolism          | Metabolism                     | Amino acid metabolism                       | 12 | 329 | 491  | 27882 | 0.02444      | 0.0144<br>16 | 0.2331<br>64 |
| ko00710 | Carbon fixation in photosynthetic organisms | Metabolism                     | Energy metabolism                           | 7  | 329 | 225  | 27882 | 0.03111<br>1 | 0.0178<br>6  | 0.2331<br>64 |
| ko00944 | Flavone and flavonol biosynthesis           | Metabolism                     | Biosynthesis of other secondary metabolites | 2  | 329 | 18   | 27882 | 0.11111<br>1 | 0.0187<br>49 | 0.2331<br>64 |
| ko04145 | Phagosome                                   | Cellular Processes             | Transport and catabolism                    | 9  | 329 | 342  | 27882 | 0.02631<br>6 | 0.0209<br>85 | 0.2331<br>64 |
| ko00591 | Linoleic acid metabolism                    | Metabolism                     | Lipid metabolism                            | 6  | 329 | 198  | 27882 | 0.03030<br>3 | 0.0305<br>65 | 0.3043<br>07 |
| ko00941 | Flavonoid biosynthesis                      | Metabolism                     | Biosynthesis of other secondary metabolites | 8  | 329 | 314  | 27882 | 0.02547<br>8 | 0.0337<br>1  | 0.3043<br>07 |
| ko04120 | Ubiquitin mediated proteolysis              | Genetic Information Processing | Folding, sorting and degradation            | 16 | 329 | 824  | 27882 | 0.01941<br>7 | 0.0365<br>17 | 0.3043<br>07 |
| ko00010 | Glycolysis / Gluconeogenesis                | Metabolism                     | Carbohydrate metabolism                     | 11 | 329 | 576  | 27882 | 0.01909<br>7 | 0.0813<br>25 | 0.6255<br>77 |
| ko00910 | Nitrogen metabolism                         | Metabolism                     | Energy metabolism                           | 4  | 329 | 153  | 27882 | 0.02614<br>4 | 0.1078<br>88 | 0.7706<br>31 |
| ko00051 | Fructose and mannose metabolism             | Metabolism                     | Carbohydrate metabolism                     | 5  | 329 | 249  | 27882 | 0.02008      | 0.1726<br>13 | 0.9143<br>35 |
| ko00190 | Oxidative phosphorylation                   | Metabolism                     | Energy metabolism                           | 9  | 329 | 531  | 27882 | 0.01694<br>9 | 0.1783<br>22 | 0.9143<br>35 |
| ko00592 | alpha-Linolenic acid metabolism             | Metabolism                     | Lipid metabolism                            | 6  | 329 | 309  | 27882 | 0.01941<br>7 | 0.1600<br>86 | 0.9143<br>35 |
| ko01230 | Biosynthesis of amino acids                 | Metabolism                     | Global and overview maps                    | 18 | 329 | 1205 | 27882 | 0.01493<br>8 | 0.1828<br>67 | 0.9143<br>35 |
| ko03050 | Proteasome                                  | Genetic Information Processing | Folding, sorting and degradation            | 5  | 329 | 253  | 27882 | 0.01976<br>3 | 0.1804<br>8  | 0.9143<br>35 |

|         |                                                |            |                       |   |     |     |       |              |              |              |
|---------|------------------------------------------------|------------|-----------------------|---|-----|-----|-------|--------------|--------------|--------------|
| ko00290 | Valine, leucine and isoleucine<br>biosynthesis | Metabolism | Amino acid metabolism | 3 | 329 | 129 | 27882 | 0.02325<br>6 | 0.1957<br>25 | 0.9320<br>26 |
|---------|------------------------------------------------|------------|-----------------------|---|-----|-----|-------|--------------|--------------|--------------|

---

**Table S4.** Level 2 gene ontology annotation of middlingly expressed genes in four floral buds.

| Term type              | Term type level 2      | GO Term                                                                               | Term Candidate<br>Gene Num | Rich<br>Ratio | P<br>value   |
|------------------------|------------------------|---------------------------------------------------------------------------------------|----------------------------|---------------|--------------|
| biological_<br>process | metabolic process      | organonitrogen compound metabolic process                                             | 500                        | 0.135<br>355  | 2.99<br>E-08 |
|                        | metabolic process      | small molecule metabolic process                                                      | 250                        | 0.148<br>633  | 2.04<br>E-07 |
|                        | cellular process       | organic acid metabolic process                                                        | 157                        | 0.149<br>952  | 3.01<br>E-05 |
|                        | cellular process       | oxoacid metabolic process                                                             | 156                        | 0.15          | 3.14<br>E-05 |
|                        | cellular process       | carboxylic acid metabolic process                                                     | 152                        | 0.148<br>148  | 7.49<br>E-05 |
|                        | biological regulation  | regulation of translational initiation                                                | 15                         | 0.319<br>149  | 0.00<br>0101 |
|                        | metabolic process      | organonitrogen compound biosynthetic process                                          | 249                        | 0.135<br>769  | 0.00<br>0184 |
|                        | cellular process       | nucleobase-containing small molecule metabolic process                                | 75                         | 0.165<br>929  | 0.00<br>0197 |
|                        | cell                   | intracellular                                                                         | 1177                       | 0.120<br>755  | 5.05<br>E-07 |
|                        | cell                   | cytoplasm                                                                             | 698                        | 0.127<br>071  | 1.25<br>E-06 |
| cellular_co<br>mponent | cell                   | intracellular part                                                                    | 1120                       | 0.120<br>872  | 1.44<br>E-06 |
|                        | cell                   | endomembrane system                                                                   | 164                        | 0.150<br>597  | 1.55<br>E-05 |
|                        | cell                   | cytosol                                                                               | 94                         | 0.165<br>202  | 3.69<br>E-05 |
|                        | cell                   | cell                                                                                  | 1275                       | 0.117<br>609  | 5.09<br>E-05 |
|                        | cell                   | cytoplasmic part                                                                      | 530                        | 0.126<br>221  | 0.00<br>0104 |
|                        | macromolecular complex | peptidase complex                                                                     | 26                         | 0.234<br>234  | 0.00<br>0145 |
|                        | cell                   | cell part                                                                             | 1253                       | 0.117<br>179  | 0.00<br>0162 |
|                        | binding                | translation initiation factor activity                                                | 41                         | 0.241<br>176  | 4.19<br>E-07 |
|                        | binding                | translation factor activity, RNA binding                                              | 52                         | 0.185<br>714  | 5.04<br>E-05 |
|                        | catalytic activity     | oxidoreductase activity, acting on the CH-OH group of donors, NAD or NADP as acceptor | 40                         | 0.198<br>02   | 8.55<br>E-05 |
| F<br>0                 | biological_<br>process | metabolic process                                                                     | 256                        | 0.152<br>2    | 1.04<br>E-07 |
|                        | biological_<br>process | biological regulation                                                                 | 16                         | 0.340<br>426  | 3.12<br>E-05 |

|                    |                        |                                                                                       |      |       |      |
|--------------------|------------------------|---------------------------------------------------------------------------------------|------|-------|------|
| cellular_component | cellular process       | organic acid metabolic process                                                        | 159  | 0.151 | 3.96 |
|                    |                        |                                                                                       |      | 862   | E-05 |
|                    | cellular process       | oxoacid metabolic process                                                             | 158  | 0.151 | 4.11 |
|                    |                        |                                                                                       |      | 923   | E-05 |
|                    | cell                   | intracellular                                                                         | 1203 | 0.123 | 2.74 |
|                    |                        |                                                                                       |      | 423   | E-08 |
|                    | cell                   | intracellular part                                                                    | 1141 | 0.123 | 2.62 |
|                    |                        |                                                                                       |      | 138   | E-07 |
|                    | cell                   | cell                                                                                  | 1312 | 0.121 | 4.57 |
|                    |                        |                                                                                       |      | 022   | E-07 |
|                    | cell                   | cytoplasm                                                                             | 707  | 0.128 | 1.08 |
|                    |                        |                                                                                       |      | 709   | E-06 |
|                    | cell                   | endomembrane system                                                                   | 172  | 0.157 | 1.12 |
|                    |                        |                                                                                       |      | 943   | E-06 |
|                    | cell                   | cell part                                                                             | 1290 | 0.120 | 1.88 |
|                    |                        |                                                                                       |      | 64    | E-06 |
|                    | cell                   | cytosol                                                                               | 98   | 0.172 | 7.51 |
|                    |                        |                                                                                       |      | 232   | E-06 |
|                    | cell                   | cytoplasmic part                                                                      | 544  | 0.129 | 1.88 |
|                    |                        |                                                                                       |      | 555   | E-05 |
| molecular_function | macromolecular complex | macromolecular complex                                                                | 403  | 0.132 | 4.99 |
|                    |                        |                                                                                       |      | 435   | E-05 |
|                    | macromolecular complex | protein complex                                                                       | 209  | 0.143 | 4.70 |
|                    |                        |                                                                                       |      | 939   | E-05 |
|                    | macromolecular complex | peptidase complex                                                                     | 27   | 0.243 | 6.83 |
|                    |                        |                                                                                       |      | 243   | E-05 |
|                    | cell                   | endoplasmic reticulum                                                                 | 78   | 0.171 | 7.31 |
|                    |                        |                                                                                       |      | 429   | E-05 |
|                    | binding                | translation initiation factor activity                                                | 40   | 0.235 | 1.27 |
|                    |                        |                                                                                       |      | 294   | E-06 |
| biological_process | catalytic activity     | oxidoreductase activity, acting on the CH-OH group of donors, NAD or NADP as acceptor | 42   | 0.207 | 1.93 |
|                    |                        |                                                                                       |      | 921   | E-05 |
|                    | binding                | coenzyme binding                                                                      | 126  | 0.150 | 4.86 |
|                    |                        |                                                                                       |      | 718   | E-05 |
|                    | catalytic activity     | oxidoreductase activity, acting on CH-OH group of donors                              | 50   | 0.185 | 8.38 |
|                    |                        |                                                                                       |      | 185   | E-05 |
|                    | metabolic process      | organonitrogen compound metabolic process                                             | 432  | 0.116 | 7.32 |
|                    |                        |                                                                                       |      | 946   | E-07 |
|                    | cellular process       | nucleobase-containing small molecule metabolic process                                | 75   | 0.165 | 1.69 |
|                    |                        |                                                                                       |      | 929   | E-06 |
|                    | cellular process       | cellular nitrogen compound biosynthetic process                                       | 300  | 0.120 | 5.67 |
|                    |                        |                                                                                       |      | 676   | E-06 |
|                    | metabolic process      | small molecule metabolic process                                                      | 213  | 0.126 | 8.28 |
|                    |                        |                                                                                       |      | 635   | E-06 |
|                    | cellular process       | ribose phosphate metabolic process                                                    | 49   | 0.176 | 2.12 |
|                    |                        |                                                                                       |      | 259   | E-05 |
| M                  | cellular process       | purine-containing compound metabolic process                                          | 46   | 0.179 | 2.28 |
|                    |                        |                                                                                       |      | 688   | E-05 |

|                        |                                                  |                                                                                          |      |              |              |
|------------------------|--------------------------------------------------|------------------------------------------------------------------------------------------|------|--------------|--------------|
| cellular_<br>component | metabolic process                                | organic cyclic compound biosynthetic process                                             | 214  | 0.124<br>854 | 2.02<br>E-05 |
|                        | cellular process                                 | pyruvate metabolic process                                                               | 19   | 0.267<br>606 | 2.77<br>E-05 |
|                        | cellular process                                 | nucleotide metabolic process                                                             | 57   | 0.163<br>793 | 4.26<br>E-05 |
|                        | cellular process                                 | nucleoside phosphate metabolic process                                                   | 57   | 0.163<br>324 | 4.62<br>E-05 |
|                        | cellular process                                 | heterocycle biosynthetic process                                                         | 200  | 0.124<br>069 | 5.73<br>E-05 |
|                        | cellular process                                 | purine ribonucleotide metabolic process                                                  | 39   | 0.182<br>243 | 6.76<br>E-05 |
|                        | cellular process                                 | purine nucleotide metabolic process                                                      | 39   | 0.179<br>724 | 9.24<br>E-05 |
|                        | cell                                             | cytoplasm                                                                                | 606  | 0.110<br>322 | 2.39<br>E-05 |
|                        | cell                                             | intracellular part                                                                       | 975  | 0.105<br>223 | 2.94<br>E-05 |
|                        | cell                                             | intracellular                                                                            | 1020 | 0.104<br>648 | 3.75<br>E-05 |
|                        | binding                                          | translation initiation factor activity                                                   | 35   | 0.205<br>882 | 5.44<br>E-06 |
|                        | binding                                          | protein heterodimerization activity                                                      | 24   | 0.230<br>769 | 2.23<br>E-05 |
|                        | binding                                          | translation factor activity, RNA binding                                                 | 46   | 0.164<br>286 | 9.83<br>E-05 |
|                        | catalytic activity                               | oxidoreductase activity, acting on the CH-OH group<br>of donors, NAD or NADP as acceptor | 36   | 0.178<br>218 | 0.00<br>0104 |
| biological_<br>process | cellular process                                 | cellular nitrogen compound biosynthetic process                                          | 284  | 0.114<br>24  | 1.89<br>E-05 |
|                        | metabolic process                                | organonitrogen compound metabolic process                                                | 404  | 0.109<br>367 | 1.44<br>E-05 |
|                        | metabolic process                                | small molecule metabolic process                                                         | 201  | 0.119<br>501 | 2.99<br>E-05 |
|                        | metabolic process                                | biosynthetic process                                                                     | 450  | 0.106<br>333 | 6.84<br>E-05 |
|                        | cellular component<br>organization or biogenesis | formation of translation preinitiation complex                                           | 13   | 0.276<br>596 | 0.00<br>0221 |
|                        | cellular process                                 | cytoplasmic translational initiation                                                     | 13   | 0.276<br>596 | 0.00<br>0221 |
|                        | cell                                             | cytoplasm                                                                                | 593  | 0.107<br>956 | 1.13<br>E-06 |
|                        | cell                                             | proteasome complex                                                                       | 22   | 0.239<br>13  | 2.42<br>E-05 |
|                        | cell                                             | intracellular                                                                            | 979  | 0.100<br>441 | 2.14<br>E-05 |
|                        | cell                                             | cell                                                                                     | 1082 | 0.099<br>806 | 9.12<br>E-06 |
|                        |                                                  |                                                                                          |      |              |              |
|                        |                                                  |                                                                                          |      |              |              |
| cellular_<br>component |                                                  |                                                                                          |      |              |              |
|                        |                                                  |                                                                                          |      |              |              |

|                        |                              |                                                    |      |       |      |
|------------------------|------------------------------|----------------------------------------------------|------|-------|------|
| molecular_<br>function | cell                         | cytoplasmic part                                   | 456  | 0.108 | 2.27 |
|                        |                              |                                                    |      | 597   | E-05 |
|                        | macromolecular complex       | peptidase complex                                  | 25   | 0.225 | 2.11 |
|                        |                              |                                                    |      | 225   | E-05 |
|                        | macromolecular complex       | endopeptidase complex                              | 22   | 0.239 | 2.42 |
|                        |                              |                                                    |      | 13    | E-05 |
|                        | cell                         | cell part                                          | 1061 | 0.099 | 5.19 |
|                        |                              |                                                    |      | 224   | E-05 |
|                        | cell                         | cytosol                                            | 80   | 0.140 | 8.93 |
|                        |                              |                                                    |      | 598   | E-05 |
|                        | cell                         | eukaryotic translation initiation factor 3 complex | 13   | 0.276 | 0.00 |
|                        |                              |                                                    |      | 596   | 0236 |
|                        | binding                      | translation initiation factor activity             | 35   | 0.205 | 2.08 |
|                        |                              |                                                    |      | 882   | E-06 |
|                        | structural molecule activity | structural molecule activity                       | 105  | 0.133 | 1.82 |
|                        |                              |                                                    |      | 08    | E-05 |
|                        | binding                      | protein heterodimerization activity                | 22   | 0.211 | 0.00 |
|                        |                              |                                                    |      | 538   | 0102 |
|                        | catalytic activity           | threonine-type endopeptidase activity              | 11   | 0.297 | 0.00 |
|                        |                              |                                                    |      | 297   | 0259 |

---

**Table S5.** KEGG enrichment analysis of middlingly expressed genes in four floral buds.

| Pathway ID | Pathway Name                                | Level 1                              | Level 2                              | Term<br>Candidate<br>Gene<br>Num | Total<br>Candidate<br>Gene<br>Num | Term<br>Gene<br>Num | Total<br>Gene<br>Num | Rich<br>Ratio | P value  |
|------------|---------------------------------------------|--------------------------------------|--------------------------------------|----------------------------------|-----------------------------------|---------------------|----------------------|---------------|----------|
| ko03050    | Proteasome                                  | Genetic Information Processing       | Folding, sorting and degradation     | 49                               | 2638                              | 253                 | 27882                | 0.193676      | 1.00E-06 |
| ko01200    | Carbon metabolism                           | Metabolism                           | Global and overview maps             | 137                              | 2638                              | 1018                | 27882                | 0.134578      | 1.50E-05 |
| ko01230    | Biosynthesis of amino acids                 | Metabolism                           | Global and overview maps             | 151                              | 2638                              | 1205                | 27882                | 0.125311      | 0.000203 |
| ko03010    | Ribosome                                    | Genetic Information Processing       | Translation                          | 146                              | 2638                              | 1200                | 27882                | 0.121667      | 0.000907 |
| ko00860    | Porphyrin and chlorophyll metabolism        | Metabolism                           | Metabolism of cofactors and vitamins | 33                               | 2638                              | 203                 | 27882                | 0.162562      | 0.001481 |
| ko00250    | Alanine, aspartate and glutamate metabolism | Metabolism                           | Amino acid metabolism                | 28                               | 2638                              | 177                 | 27882                | 0.158192      | 0.004771 |
| ko04075    | Plant hormone signal transduction           | Environmental Information Processing | Signal transduction                  | 168                              | 2638                              | 1472                | 27882                | 0.11413       | 0.005772 |
| ko00010    | Glycolysis / Gluconeogenesis                | Metabolism                           | Carbohydrate metabolism              | 72                               | 2638                              | 576                 | 27882                | 0.125         | 0.009017 |
| ko00620    | Pyruvate metabolism                         | Metabolism                           | Carbohydrate metabolism              | 45                               | 2638                              | 330                 | 27882                | 0.136364      | 0.008167 |
| ko04145    | Phagosome                                   | Cellular Processes                   | Transport and catabolism             | 46                               | 2638                              | 342                 | 27882                | 0.134503      | 0.009624 |
| ko04136    | Autophagy - other                           | Cellular Processes                   | Transport and catabolism             | 26                               | 2638                              | 173                 | 27882                | 0.150289      | 0.012198 |
| ko03060    | Protein export                              | Genetic Information Processing       | Folding, sorting and degradation     | 32                               | 2638                              | 226                 | 27882                | 0.141593      | 0.013854 |
| ko04146    | Peroxisome                                  | Cellular Processes                   | Transport and catabolism             | 53                               | 2638                              | 416                 | 27882                | 0.127404      | 0.016048 |
| ko00020    | Citrate cycle (TCA cycle)                   | Metabolism                           | Carbohydrate metabolism              | 26                               | 2638                              | 182                 | 27882                | 0.142857      | 0.022219 |
| ko00030    | Pentose phosphate pathway                   | Metabolism                           | Carbohydrate metabolism              | 35                               | 2638                              | 260                 | 27882                | 0.134615      | 0.021356 |
| ko00710    | Carbon fixation in photosynthetic organisms | Metabolism                           | Energy metabolism                    | 31                               | 2638                              | 225                 | 27882                | 0.137778      | 0.021665 |
| ko00280    | Valine, leucine and isoleucine degradation  | Metabolism                           | Amino acid metabolism                | 36                               | 2638                              | 271                 | 27882                | 0.132841      | 0.023771 |
| ko03015    | mRNA surveillance pathway                   | Genetic Information Processing       | Translation                          | 107                              | 2638                              | 945                 | 27882                | 0.113228      | 0.028908 |
| ko01212    | Fatty acid metabolism                       | Metabolism                           | Global and overview maps             | 37                               | 2638                              | 286                 | 27882                | 0.129371      | 0.031715 |
| ko04712    | Circadian rhythm - plant                    | Organismal Systems                   | Environmental adaptation             | 52                               | 2638                              | 425                 | 27882                | 0.122353      | 0.03313  |

|         |                                                 |                                      |                                      |     |      |      |       |          |          |
|---------|-------------------------------------------------|--------------------------------------|--------------------------------------|-----|------|------|-------|----------|----------|
| ko03050 | Proteasome                                      | Genetic Information Processing       | Folding, sorting and degradation     | 47  | 2608 | 253  | 27882 | 0.185771 | 3.99E-06 |
| ko01200 | Carbon metabolism                               | Metabolism                           | Global and overview maps             | 137 | 2608 | 1018 | 27882 | 0.134578 | 8.53E-06 |
| ko01230 | Biosynthesis of amino acids                     | Metabolism                           | Global and overview maps             | 150 | 2608 | 1205 | 27882 | 0.124481 | 0.000172 |
| ko00860 | Porphyrin and chlorophyll metabolism            | Metabolism                           | Metabolism of cofactors and vitamins | 35  | 2608 | 203  | 27882 | 0.172414 | 0.000293 |
| ko00280 | Valine, leucine and isoleucine degradation      | Metabolism                           | Amino acid metabolism                | 41  | 2608 | 271  | 27882 | 0.151292 | 0.001463 |
| ko04075 | Plant hormone signal transduction               | Environmental Information Processing | Signal transduction                  | 171 | 2608 | 1472 | 27882 | 0.116168 | 0.00166  |
| ko00071 | Fatty acid degradation                          | Metabolism                           | Lipid metabolism                     | 35  | 2608 | 228  | 27882 | 0.153509 | 0.002434 |
| ko00010 | Glycolysis / Gluconeogenesis                    | Metabolism                           | Carbohydrate metabolism              | 73  | 2608 | 576  | 27882 | 0.126736 | 0.00478  |
| ko00250 | Alanine, aspartate and glutamate metabolism     | Metabolism                           | Amino acid metabolism                | 28  | 2608 | 177  | 27882 | 0.158192 | 0.004078 |
| ko00620 | Pyruvate metabolism                             | Metabolism                           | Carbohydrate metabolism              | 46  | 2608 | 330  | 27882 | 0.139394 | 0.004109 |
| ko01212 | Fatty acid metabolism                           | Metabolism                           | Global and overview maps             | 41  | 2608 | 286  | 27882 | 0.143357 | 0.003967 |
| ko03010 | Ribosome                                        | Genetic Information Processing       | Translation                          | 139 | 2608 | 1200 | 27882 | 0.115833 | 0.004771 |
| ko01040 | Biosynthesis of unsaturated fatty acids         | Metabolism                           | Lipid metabolism                     | 21  | 2608 | 124  | 27882 | 0.169355 | 0.00542  |
| ko04145 | Phagosome                                       | Cellular Processes                   | Transport and catabolism             | 46  | 2608 | 342  | 27882 | 0.134503 | 0.007903 |
| ko04712 | Circadian rhythm - plant                        | Organismal Systems                   | Environmental adaptation             | 55  | 2608 | 425  | 27882 | 0.129412 | 0.008678 |
| ko00604 | Glycosphingolipid biosynthesis - ganglio series | Metabolism                           | Glycan biosynthesis and metabolism   | 19  | 2608 | 114  | 27882 | 0.166667 | 0.009361 |
| ko04136 | Autophagy - other                               | Cellular Processes                   | Transport and catabolism             | 26  | 2608 | 173  | 27882 | 0.150289 | 0.010632 |
| ko03015 | mRNA surveillance pathway                       | Genetic Information Processing       | Translation                          | 109 | 2608 | 945  | 27882 | 0.115344 | 0.012849 |
| ko04122 | Sulfur relay system                             | Genetic Information Processing       | Folding, sorting and degradation     | 9   | 2608 | 42   | 27882 | 0.214286 | 0.014069 |
| ko00630 | Glyoxylate and dicarboxylate metabolism         | Metabolism                           | Carbohydrate metabolism              | 37  | 2608 | 275  | 27882 | 0.134545 | 0.015773 |
| ko03050 | Proteasome                                      | Genetic Information Processing       | Folding, sorting and degradation     | 40  | 2285 | 253  | 27882 | 0.158103 | 4.52E-05 |
| ko00250 | Alanine, aspartate and glutamate metabolism     | Metabolism                           | Amino acid metabolism                | 28  | 2285 | 177  | 27882 | 0.158192 | 0.00058  |

|         |                                             |                                      |                                             |     |      |      |       |          |          |
|---------|---------------------------------------------|--------------------------------------|---------------------------------------------|-----|------|------|-------|----------|----------|
| ko03010 | Ribosome                                    | Genetic Information Processing       | Translation                                 | 131 | 2285 | 1200 | 27882 | 0.109167 | 0.000437 |
| ko01200 | Carbon metabolism                           | Metabolism                           | Global and overview maps                    | 112 | 2285 | 1018 | 27882 | 0.11002  | 0.000841 |
| ko00860 | Porphyrin and chlorophyll metabolism        | Metabolism                           | Metabolism of cofactors and vitamins        | 29  | 2285 | 203  | 27882 | 0.142857 | 0.002375 |
| ko04075 | Plant hormone signal transduction           | Environmental Information Processing | Signal transduction                         | 149 | 2285 | 1472 | 27882 | 0.101223 | 0.004021 |
| ko03015 | mRNA surveillance pathway                   | Genetic Information Processing       | Translation                                 | 99  | 2285 | 945  | 27882 | 0.104762 | 0.00686  |
| ko04122 | Sulfur relay system                         | Genetic Information Processing       | Folding, sorting and degradation            | 9   | 2285 | 42   | 27882 | 0.214286 | 0.006123 |
| ko00710 | Carbon fixation in photosynthetic organisms | Metabolism                           | Energy metabolism                           | 29  | 2285 | 225  | 27882 | 0.128889 | 0.010154 |
| ko00440 | Phosphonate and phosphinate metabolism      | Metabolism                           | Metabolism of other amino acids             | 7   | 2285 | 32   | 27882 | 0.21875  | 0.013369 |
| ko04136 | Autophagy - other                           | Cellular Processes                   | Transport and catabolism                    | 23  | 2285 | 173  | 27882 | 0.132948 | 0.014514 |
| ko04145 | Phagosome                                   | Cellular Processes                   | Transport and catabolism                    | 40  | 2285 | 342  | 27882 | 0.116959 | 0.014584 |
| ko01230 | Biosynthesis of amino acids                 | Metabolism                           | Global and overview maps                    | 119 | 2285 | 1205 | 27882 | 0.098755 | 0.018912 |
| ko00071 | Fatty acid degradation                      | Metabolism                           | Lipid metabolism                            | 28  | 2285 | 228  | 27882 | 0.122807 | 0.020651 |
| ko00190 | Oxidative phosphorylation                   | Metabolism                           | Energy metabolism                           | 57  | 2285 | 531  | 27882 | 0.107345 | 0.022094 |
| ko01040 | Biosynthesis of unsaturated fatty acids     | Metabolism                           | Lipid metabolism                            | 17  | 2285 | 124  | 27882 | 0.137097 | 0.024764 |
| ko00062 | Fatty acid elongation                       | Metabolism                           | Lipid metabolism                            | 15  | 2285 | 110  | 27882 | 0.136364 | 0.034909 |
| ko00010 | Glycolysis / Gluconeogenesis                | Metabolism                           | Carbohydrate metabolism                     | 59  | 2285 | 576  | 27882 | 0.102431 | 0.044808 |
| ko00943 | Isoflavonoid biosynthesis                   | Metabolism                           | Biosynthesis of other secondary metabolites | 16  | 2285 | 124  | 27882 | 0.129032 | 0.046617 |
| ko00770 | Pantothenate and CoA biosynthesis           | Metabolism                           | Metabolism of cofactors and vitamins        | 20  | 2285 | 165  | 27882 | 0.121212 | 0.050295 |
| ko03010 | Ribosome                                    | Genetic Information Processing       | Translation                                 | 135 | 2208 | 1200 | 27882 | 0.1125   | 2.03E-05 |
| ko03050 | Proteasome                                  | Genetic Information Processing       | Folding, sorting and degradation            | 39  | 2208 | 253  | 27882 | 0.15415  | 4.70E-05 |
| ko04145 | Phagosome                                   | Cellular Processes                   | Transport and catabolism                    | 46  | 2208 | 342  | 27882 | 0.134503 | 0.000294 |
| ko03015 | mRNA surveillance pathway                   | Genetic Information Processing       | Translation                                 | 103 | 2208 | 945  | 27882 | 0.108995 | 0.000586 |
| ko01200 | Carbon metabolism                           | Metabolism                           | Global and overview maps                    | 108 | 2208 | 1018 | 27882 | 0.10609  | 0.001118 |

|         |                                             |                                      |                                      |     |      |      |       |          |          |
|---------|---------------------------------------------|--------------------------------------|--------------------------------------|-----|------|------|-------|----------|----------|
| ko04075 | Plant hormone signal transduction           | Environmental Information Processing | Signal transduction                  | 149 | 2208 | 1472 | 27882 | 0.101223 | 0.001082 |
| ko00440 | Phosphonate and phosphinate metabolism      | Metabolism                           | Metabolism of other amino acids      | 8   | 2208 | 32   | 27882 | 0.25     | 0.002865 |
| ko00250 | Alanine, aspartate and glutamate metabolism | Metabolism                           | Amino acid metabolism                | 25  | 2208 | 177  | 27882 | 0.141243 | 0.003401 |
| ko01040 | Biosynthesis of unsaturated fatty acids     | Metabolism                           | Lipid metabolism                     | 19  | 2208 | 124  | 27882 | 0.153226 | 0.004072 |
| ko04122 | Sulfur relay system                         | Genetic Information Processing       | Folding, sorting and degradation     | 9   | 2208 | 42   | 27882 | 0.214286 | 0.004897 |
| ko01212 | Fatty acid metabolism                       | Metabolism                           | Global and overview maps             | 35  | 2208 | 286  | 27882 | 0.122378 | 0.006821 |
| ko04136 | Autophagy - other                           | Cellular Processes                   | Transport and catabolism             | 23  | 2208 | 173  | 27882 | 0.132948 | 0.009942 |
| ko00190 | Oxidative phosphorylation                   | Metabolism                           | Energy metabolism                    | 57  | 2208 | 531  | 27882 | 0.107345 | 0.011917 |
| ko00280 | Valine, leucine and isoleucine degradation  | Metabolism                           | Amino acid metabolism                | 32  | 2208 | 271  | 27882 | 0.118081 | 0.015244 |
| ko00860 | Porphyrin and chlorophyll metabolism        | Metabolism                           | Metabolism of cofactors and vitamins | 25  | 2208 | 203  | 27882 | 0.123153 | 0.018442 |
| ko00780 | Biotin metabolism                           | Metabolism                           | Metabolism of cofactors and vitamins | 11  | 2208 | 70   | 27882 | 0.157143 | 0.021172 |
| ko00061 | Fatty acid biosynthesis                     | Metabolism                           | Lipid metabolism                     | 22  | 2208 | 182  | 27882 | 0.120879 | 0.031023 |
| ko00630 | Glyoxylate and dicarboxylate metabolism     | Metabolism                           | Carbohydrate metabolism              | 31  | 2208 | 275  | 27882 | 0.112727 | 0.029729 |
| ko00710 | Carbon fixation in photosynthetic organisms | Metabolism                           | Energy metabolism                    | 26  | 2208 | 225  | 27882 | 0.115556 | 0.033578 |
| ko00071 | Fatty acid degradation                      | Metabolism                           | Lipid metabolism                     | 26  | 2208 | 228  | 27882 | 0.114035 | 0.03859  |

**Table S6.** Level 2 gene ontology annotation of the DEGs between M0 vs. F0, M1 vs. F1, and 7029 DEGs of the two compared groups in ontologies.

| Group     | Term type          | Term type level 2     | GO Term                                                                                                              | Term Candidate Gene Num | Rich Ratio | P value  |
|-----------|--------------------|-----------------------|----------------------------------------------------------------------------------------------------------------------|-------------------------|------------|----------|
| M0 vs. F0 | biological_process | cellular process      | photosynthetic electron transport in photosystem II                                                                  | 11                      | 0.34375    | 2.08E-05 |
|           |                    | response to stimulus  | response to toxic substance                                                                                          | 17                      | 0.236111   | 3.70E-05 |
|           |                    | cellular process      | photosynthetic electron transport chain                                                                              | 11                      | 0.275      | 0.000206 |
|           |                    | response to stimulus  | response to herbicide                                                                                                | 8                       | 0.333333   | 0.000363 |
|           |                    | cellular process      | malonyl-CoA metabolic process                                                                                        | 3                       | 1          | 0.000502 |
|           |                    | cellular process      | malonyl-CoA biosynthetic process                                                                                     | 3                       | 1          | 0.000502 |
|           |                    | cellular process      | toxin metabolic process                                                                                              | 7                       | 0.333333   | 0.000851 |
|           | cellular_component | cell                  | cytoplasmic part                                                                                                     | 430                     | 0.102405   | 1.56E-08 |
|           |                    | cell                  | cytoplasm                                                                                                            | 534                     | 0.097215   | 2.14E-07 |
|           |                    | cell                  | cytosol                                                                                                              | 77                      | 0.135325   | 6.21E-06 |
|           |                    | organelle part        | plastoglobule                                                                                                        | 9                       | 0.36       | 9.35E-05 |
|           |                    | cell junction         | cell-cell junction                                                                                                   | 21                      | 0.169355   | 0.000997 |
|           |                    | catalytic activity    | electron transporter, transferring electrons within the cyclic electron transport pathway of photosynthesis activity | 11                      | 0.423077   | 1.57E-06 |
|           |                    | catalytic activity    | peptidyl-prolyl cis-trans isomerase activity                                                                         | 19                      | 0.17757    | 0.000553 |
|           | molecular_function | catalytic activity    | dihydropolypyllysine-residue succinyltransferase activity                                                            | 3                       | 1          | 0.000469 |
|           |                    | catalytic activity    | electron transfer activity                                                                                           | 36                      | 0.138996   | 0.000486 |
|           |                    | catalytic activity    | oxidoreductase activity, acting on diphenols and related substances as donors, oxygen as acceptor                    | 12                      | 0.230769   | 0.000518 |
|           |                    | catalytic activity    | succinyltransferase activity                                                                                         | 3                       | 1          | 0.000469 |
|           |                    | catalytic activity    | S-succinyltransferase activity                                                                                       | 3                       | 1          | 0.000469 |
|           |                    | catalytic activity    | cis-trans isomerase activity                                                                                         | 19                      | 0.17757    | 0.000553 |
| M1 vs. F1 | biological_process | biological regulation | positive regulation of response to stimulus                                                                          | 10                      | 0.238095   | 0.002648 |
|           |                    | cellular process      | threonyl-tRNA aminoacylation                                                                                         | 3                       | 0.6        | 0.005728 |
|           |                    | cellular process      | aspartate family amino acid metabolic process                                                                        | 14                      | 0.184211   | 0.005395 |
|           | cellular_component | cell                  | cytosol                                                                                                              | 79                      | 0.13884    | 4.86E-05 |
|           |                    | cell                  | cytoplasm                                                                                                            | 547                     | 0.099581   | 0.000714 |
|           |                    | cell                  | cytoplasmic part                                                                                                     | 426                     | 0.101453   | 0.000911 |
|           |                    | cell                  | clathrin coat                                                                                                        | 9                       | 0.25       | 0.003576 |
|           |                    | cell                  | AP-type membrane coat adaptor complex                                                                                | 9                       | 0.230769   | 0.006317 |

|                    |                      |                                                                                                                      |     |          |          |
|--------------------|----------------------|----------------------------------------------------------------------------------------------------------------------|-----|----------|----------|
| molecular_function | cell                 | clathrin adaptor complex                                                                                             | 7   | 0.291667 | 0.003937 |
|                    | cell                 | dihydrolipoyl dehydrogenase complex                                                                                  | 3   | 0.6      | 0.006166 |
|                    | catalytic activity   | quercetin 3-O-glucosyltransferase activity                                                                           | 16  | 0.296296 | 6.90E-06 |
|                    | catalytic activity   | quercetin 7-O-glucosyltransferase activity                                                                           | 16  | 0.296296 | 6.90E-06 |
|                    | catalytic activity   | dihydrolipoyllysine-residue succinyltransferase activity                                                             | 3   | 1        | 0.000622 |
|                    | catalytic activity   | succinyltransferase activity                                                                                         | 3   | 1        | 0.000622 |
|                    | catalytic activity   | S-succinyltransferase activity                                                                                       | 3   | 1        | 0.000622 |
|                    | catalytic activity   | ubiquitin-ubiquitin ligase activity                                                                                  | 4   | 0.571429 | 0.001503 |
|                    | transporter activity | ammonium transmembrane transporter activity                                                                          | 5   | 0.416667 | 0.002146 |
|                    | binding              | mRNA binding                                                                                                         | 17  | 0.168317 | 0.005104 |
|                    | catalytic activity   | 6-phosphofructokinase activity                                                                                       | 5   | 0.357143 | 0.004694 |
|                    | catalytic activity   | threonine-tRNA ligase activity                                                                                       | 3   | 0.6      | 0.005451 |
| biological_process | cellular process     | protein-chromophore linkage                                                                                          | 23  | 0.277108 | 9.41E-05 |
|                    | response to stimulus | response to toxic substance                                                                                          | 19  | 0.263889 | 0.000724 |
|                    | cellular process     | photosynthetic electron transport in photosystem II                                                                  | 11  | 0.34375  | 0.000912 |
|                    | response to stimulus | response to chemical                                                                                                 | 108 | 0.161435 | 0.001007 |
|                    | cellular process     | malonyl-CoA metabolic process                                                                                        | 3   | 1        | 0.001778 |
|                    | cellular process     | malonyl-CoA biosynthetic process                                                                                     | 3   | 1        | 0.001778 |
|                    | cell                 | cytoplasm                                                                                                            | 750 | 0.136537 | 0.000136 |
|                    | cell                 | cytosol                                                                                                              | 103 | 0.181019 | 3.00E-05 |
|                    | cellular_component   | cell                                                                                                                 | 585 | 0.139319 | 0.000141 |
|                    | organelle part       | plastoglobule                                                                                                        | 10  | 0.4      | 0.000436 |
| molecular_function | organelle part       | post-mRNA release spliceosomal complex                                                                               | 6   | 0.5      | 0.001632 |
|                    | catalytic activity   | electron transporter, transferring electrons within the cyclic electron transport pathway of photosynthesis activity | 11  | 0.423077 | 8.76E-05 |
|                    | catalytic activity   | quercetin 3-O-glucosyltransferase activity                                                                           | 17  | 0.314815 | 0.000104 |
|                    | catalytic activity   | quercetin 7-O-glucosyltransferase activity                                                                           | 17  | 0.314815 | 0.000104 |
|                    | binding              | chlorophyll binding                                                                                                  | 21  | 0.2625   | 0.000306 |
|                    | catalytic activity   | electron transfer activity                                                                                           | 48  | 0.185328 | 0.001047 |
|                    | catalytic activity   | peptidyl-prolyl cis-trans isomerase activity                                                                         | 24  | 0.224299 | 0.001397 |
|                    | catalytic activity   | dihydrolipoyllysine-residue succinyltransferase activity                                                             | 3   | 1        | 0.001653 |
|                    | catalytic activity   | succinyltransferase activity                                                                                         | 3   | 1        | 0.001653 |
|                    | catalytic activity   | succinyltransferase activity                                                                                         | 3   | 1        | 0.001653 |
| all 7029 DEGs      |                      |                                                                                                                      |     |          |          |

|                    |                                |    |          |          |
|--------------------|--------------------------------|----|----------|----------|
| catalytic activity | S-succinyltransferase activity | 3  | 1        | 0.001653 |
| catalytic activity | cis-trans isomerase activity   | 24 | 0.224299 | 0.001397 |

---

**Table S7.** List of DEGs enriched in plant hormone synthesis and the signal transduction pathway.

| Gene ID      | Gene name | Hormone | Nr annotation                                                                                                                                                                           |
|--------------|-----------|---------|-----------------------------------------------------------------------------------------------------------------------------------------------------------------------------------------|
| MR3G014767.1 | PP2CA     | ABA     | XP_018810490.1//PREDICTED: protein phosphatase 2C 37-like [Juglans regia]<br>XP_018856710.1//PREDICTED: serine/threonine-protein kinase SAPK10-like isoform X2 [Juglans regia]          |
| MR5G022121.1 | SAPK10    | ABA     | [Juglans regia]                                                                                                                                                                         |
| MR6G000783.1 | SAPK7     | ABA     | XP_018811162.1//PREDICTED: serine/threonine-protein kinase SAPK7-like [Juglans regia]                                                                                                   |
| MR6G029272.1 | PP2C      | ABA     | XP_018846386.1//PREDICTED: probable protein phosphatase 2C 8 [Juglans regia]                                                                                                            |
| MR6G029273.1 | PP2C      | ABA     | XP_018846386.1//PREDICTED: probable protein phosphatase 2C 8 [Juglans regia]<br>XP_018817895.1//PREDICTED: ABSCISIC ACID-INSENSITIVE 5-like protein 7 [Juglans regia]                   |
| MR7G007481.1 | ABF4      | ABA     | [Juglans regia]                                                                                                                                                                         |
| MR7G011459.2 | SRK2E     | ABA     | XP_021285698.1//serine/threonine-protein kinase SRK2E isoform X1 [Herrania umbratica]                                                                                                   |
| MR7G014396.1 | PP2C      | ABA     | XP_018810781.1//PREDICTED: probable protein phosphatase 2C 51 [Juglans regia]                                                                                                           |
| MR1G009013.1 | SAUR      | Auxin   | XP_018853693.1//PREDICTED: auxin-responsive protein SAUR36-like [Juglans regia]<br>XP_011001484.1//PREDICTED: probable indole-3-acetic acid-amido synthetase GH3.1 [Populus euphratica] |
| MR1G014923.1 | GH3.1     | Auxin   | [Populus euphratica]                                                                                                                                                                    |
| MR2G004927.1 | AUX15A    | Auxin   | XP_018817449.1//PREDICTED: auxin-induced protein 15A [Juglans regia]<br>XP_018815703.1//PREDICTED: protein TRANSPORT INHIBITOR RESPONSE 1-like [Juglans regia]                          |
| MR2G006882.2 | TIR1-L    | Auxin   | [Juglans regia]                                                                                                                                                                         |
| MR2G006999.1 | SPL       | Auxin   | CAD90156.1//squamosa promoter binding like-protein [Betula pendula]                                                                                                                     |
| MR2G027556.1 | ARF6      | Auxin   | XP_018847680.1//PREDICTED: auxin response factor 6 isoform X1 [Juglans regia]<br>XP_018820113.1//PREDICTED: auxin-responsive protein IAA13-like isoform X2 [Juglans regia]              |
| MR3G001167.1 | IAA13     | Auxin   | [Juglans regia]                                                                                                                                                                         |
| MR3G011095.1 | ARF       | Auxin   | XP_018818379.1//PREDICTED: auxin response factor 18 [Juglans regia]                                                                                                                     |
| MR3G014514.1 | IAA4      | Auxin   | XP_018838419.1//PREDICTED: auxin-responsive protein IAA4-like [Juglans regia]                                                                                                           |
| MR3G014515.1 | IAA14     | Auxin   | XP_018818667.1//PREDICTED: auxin-responsive protein IAA14-like [Juglans regia]                                                                                                          |
| MR3G018668.1 | ARF18     | Auxin   | XP_018853662.1//PREDICTED: auxin response factor 18-like [Juglans regia]                                                                                                                |
| MR3G026193.1 | SAUR41    | Auxin   | XP_018839908.1//PREDICTED: auxin-responsive protein SAUR41-like [Juglans regia]<br>XP_012573044.1//PREDICTED: auxin-induced protein IAA6-like isoform X1 [Cicer arietinum]              |
| MR3G026487.1 | IAA6      | Auxin   | [Cicer arietinum]                                                                                                                                                                       |
| MR4G010547.2 | ARF9      | Auxin   | XP_018824358.1//PREDICTED: auxin response factor 9 [Juglans regia]                                                                                                                      |
| MR4G016064.1 | SAUR      | Auxin   | XP_008372027.1//PREDICTED: auxin-responsive protein SAUR71-like [Malus domestica]<br>XP_007042570.2//PREDICTED: probable indole-3-acetic acid-amido synthetase GH3.1 [Theobroma cacao]  |
| MR4G020436.1 | GH3.1     | Auxin   | [Theobroma cacao]                                                                                                                                                                       |
| MR4G021266.1 | SAUR      | Auxin   | XP_018848064.1//PREDICTED: auxin-responsive protein SAUR36-like [Juglans regia]<br>XP_018858742.1//PREDICTED: probable membrane-associated kinase regulator 2 [Juglans regia]           |
| MR4G025315.1 | MAKR2     | Auxin   | [Juglans regia]                                                                                                                                                                         |
| MR5G024618.1 | ARF19     | Auxin   | XP_018820293.1//PREDICTED: auxin response factor 19-like [Juglans regia]<br>XP_015874543.1//PREDICTED: indole-3-acetic acid-induced protein ARG7 [Ziziphus jujuba]                      |
| MR5G027067.1 | ARG7      | Auxin   | [Ziziphus jujuba]                                                                                                                                                                       |
| MR6G011287.1 | AUX22     | Auxin   | XP_018827349.1//PREDICTED: auxin-induced protein 22D-like isoform X2 [Juglans regia]<br>XP_018821933.1//PREDICTED: indole-3-acetic acid-amido synthetase GH3.6-like [Juglans regia]     |
| MR6G011335.1 | GH3.6     | Auxin   | [Juglans regia]                                                                                                                                                                         |
| MR6G022742.1 | bZIP53    | Auxin   | XP_018808498.1//PREDICTED: bZIP transcription factor 53 [Juglans regia]                                                                                                                 |
| MR7G007520.1 | ARF       | Auxin   | XP_018840018.1//PREDICTED: auxin response factor 2-like isoform X1 [Juglans regia]                                                                                                      |
| MR7G017780.1 | IAA32     | Auxin   | XP_021824179.1//auxin-responsive protein IAA32 [Prunus avium]                                                                                                                           |
| MR7G018915.1 | IAA16     | Auxin   | XP_015875440.1//PREDICTED: auxin-responsive protein IAA16 [Ziziphus jujuba]                                                                                                             |

|                     |         |       |                                                                                                        |
|---------------------|---------|-------|--------------------------------------------------------------------------------------------------------|
|                     |         |       | XP_018827784.1//PREDICTED: probable indole-3-acetic acid-amido synthetase GH3.1                        |
| MR7G022672.1        | IAA     | Auxin | [Juglans regia]                                                                                        |
| MR7TCONS_00006944.1 | SAUR21  | Auxin | MR7TCONS_00006944.1//Herrania umbratica auxin-responsive protein SAUR21-like (LOC110417626), mRNA      |
|                     |         |       | XP_018811497.1//PREDICTED: putative indole-3-acetic acid-amido synthetase GH3.9                        |
| MR8G002059.1        | GH3.9   | Auxin | [Juglans regia]                                                                                        |
| MR8G016437.1        | IAA33   | Auxin | XP_018820838.1//PREDICTED: auxin-responsive protein IAA33 [Juglans regia]                              |
|                     |         |       | XP_018843039.1//PREDICTED: indole-3-acetic acid-induced protein ARG7-like [Juglans regia]              |
| MR8G025878.1        | ARG7    | Auxin | XP_013682256.1//PREDICTED: somatic embryogenesis receptor kinase 2-like [Brassica napus]               |
| MR1G018614.1        | SERK2   | BR    | XP_018805853.1//PREDICTED: BES1/BZR1 homolog protein 4-like [Juglans regia]                            |
| MR2G000226.1        | BZR1    | BR    | XP_018853245.1//PREDICTED: BRI1 kinase inhibitor 1-like [Juglans regia]                                |
| MR3G009824.1        | BKI1    | BR    | XP_018823964.1//PREDICTED: transcription factor BIM1-like [Juglans regia]                              |
| MR5G011874.1        | BIM1    | BR    | XP_002522231.1//PREDICTED: shaggy-related protein kinase eta [Ricinus communis]                        |
| MR5G013073.1        | ASK7    | BR    | XP_018842160.1//PREDICTED: BRASSINOSTEROID INSENSITIVE 1-associated                                    |
|                     | BAK1/SE |       | receptor kinase 1-like [Juglans regia]                                                                 |
| MR7G008146.2        | RK3     | BR    | XP_018841053.1//PREDICTED: phytosulfokine receptor 1 [Juglans regia]                                   |
| MR7G009280.1        | PSKR1   | BR    | XP_018819177.1//PREDICTED: two-component response regulator ARR10-like [Juglans regia]                 |
| MR1G029229.1        | ARR     | CK    | XP_018848410.1//PREDICTED: two-component response regulator ARR9 [Juglans regia]                       |
| MR2G023469.1        | ARR     | CK    | XP_018827983.1//PREDICTED: cyclin-D3-3-like [Juglans regia]                                            |
| MR2G024054.1        | CYCD3-1 | CK    | XP_018811124.1//PREDICTED: cyclin-D3-3-like [Juglans regia]                                            |
| MR3G019062.1        | CYCD3-1 | CK    | XP_018831695.1//PREDICTED: two-component response regulator ARR5 [Juglans regia]                       |
| MR4G018351.1        | ARR     | CK    | XP_018825709.1//PREDICTED: two-component response regulator ARR1 isoform X1 [Juglans regia]            |
| MR5G017155.1        | ARR     | CK    | XP_018831439.1//PREDICTED: cyclin-D3-1-like [Juglans regia]                                            |
| MR7G022722.1        | CYCD3-1 | CK    | XP_018831439.1//PREDICTED: cyclin-D3-1-like [Juglans regia]                                            |
| MR7G022723.1        | CYCD3-1 | CK    | XP_018844398.1//PREDICTED: two-component response regulator ARR5-like [Juglans regia]                  |
| MR7G024824.1        | ARR     | CK    | XP_018831439.1//PREDICTED: cyclin-D3-1-like [Juglans regia]                                            |
| MR7G028512.1        | CYCD3-1 | CK    | XP_018850232.1//PREDICTED: two-component response regulator ARR12-like [Juglans regia]                 |
| MR8G012754.1        | ARR     | CK    | XP_018860221.1//PREDICTED: histidine-containing phosphotransfer protein 1-like [Juglans regia]         |
| MR8G019008.1        | AHP1    | CK    | XP_018846142.1//PREDICTED: histidine kinase CKI1-like [Juglans regia]                                  |
| MR8G026761.1        | CKI1    | CK    | XP_018850150.1//PREDICTED: ETHYLENE INSENSITIVE 3-like 1 protein [Juglans regia]                       |
| MR1G018593.1        | EIN3    | ET    | XP_018851486.1//PREDICTED: ethylene-insensitive protein 2-like isoform X1 [Juglans regia]              |
| MR2G016675.1        | EIN2    | ET    | XP_018810721.1//PREDICTED: ethylene receptor 2-like [Juglans regia]                                    |
| MR3G008397.1        | ETR     | ET    | XP_018824791.1//PREDICTED: probable ethylene response sensor 1 [Juglans regia]                         |
| MR7G007527.1        | ERS     | ET    | XP_018858626.1//PREDICTED: ETHYLENE INSENSITIVE 3-like 1 protein [Juglans regia]                       |
| MR8G004987.1        | EIN3    | ET    | XP_018822226.1//PREDICTED: EIN3-binding F-box protein 1-like [Juglans regia]                           |
| MR8G012695.1        | EBF1/2  | ET    | XP_018817575.1//PREDICTED: putative disease resistance RPP13-like protein 1 isoform X2 [Juglans regia] |
| MR1G002326.1        | RPPL1   | GA    | XP_018811278.1//PREDICTED: putative disease resistance RPP13-like protein 1 isoform X1 [Juglans regia] |
| MR1G022996.1        | RPPL1   | GA    | XP_018830884.1//PREDICTED: putative disease resistance RPP13-like protein 1 [Juglans regia]            |
| MR1G029366.2        | RPPL1   | GA    |                                                                                                        |

|              |           |       |                                                                                   |
|--------------|-----------|-------|-----------------------------------------------------------------------------------|
|              |           |       | XP_018852274.1//PREDICTED: chitin-inducible gibberellin-responsive protein 1-like |
| MR4G018381.1 | CIGR1     | GA    | [Juglans regia]                                                                   |
| MR6G010478.1 | SLN1      | GA    | XP_018841073.1//PREDICTED: DELLA protein SLN1-like [Juglans regia]                |
| MR6G021506.1 | GAI       | GA    | XP_018816848.1//PREDICTED: DELLA protein GAI-like [Juglans regia]                 |
| MR7G017861.1 | bHLH48    | GA    | XP_018858223.1//PREDICTED: transcription factor bHLH48-like [Juglans regia]       |
| MR7G028053.1 | GAIP-like | GA    | XP_018814727.1//PREDICTED: DELLA protein GAIP-like [Juglans regia]                |
| MR3G009918.1 | MYC2      | JA    | XP_018824308.1//PREDICTED: transcription factor MYC2-like [Juglans regia]         |
| MR3G014474.2 | TIFY 4B   | JA    | XP_018839402.1//PREDICTED: protein TIFY 4B-like isoform X1 [Juglans regia]        |
| MR5G024985.1 | TIFY 6B   | JA    | XP_018823646.1//PREDICTED: protein TIFY 6B isoform X1 [Juglans regia]             |
| MR6G007069.1 | bHLH3     | JA    | XP_018827271.1//PREDICTED: transcription factor bHLH3 [Juglans regia]             |
| MR6G022827.1 | TIFY10A   | JA    | XP_018814737.1//PREDICTED: protein TIFY 10A-like [Juglans regia]                  |
| MR6G022829.1 | TIFY 10A  | JA    | XP_018814737.1//PREDICTED: protein TIFY 10A-like [Juglans regia]                  |
| MR7G002983.1 | TIFY 10A  | JA    | XP_018859193.1//PREDICTED: protein TIFY 9-like [Juglans regia]                    |
| MR7G002984.2 | TIFY 10A  | JA    | XP_018859193.1//PREDICTED: protein TIFY 9-like [Juglans regia]                    |
| MR7G012609.1 | TIFY 10A  | JA    | XP_018859193.1//PREDICTED: protein TIFY 9-like [Juglans regia]                    |
| MR8G021808.1 | TIFY 10A  | JA    | XP_018845751.1//PREDICTED: protein TIFY 8-like isoform X2 [Juglans regia]         |
| MR2G026920.1 | PR1       | SA    | XP_018808966.1//PREDICTED: pathogenesis-related protein 1C-like [Juglans regia]   |
| MR4G022374.1 | PYL8-L    | ABA   | XP_018846392.1//PREDICTED: abscisic acid receptor PYL8-like [Juglans regia]       |
|              |           |       | XP_018829906.1//PREDICTED: protein TRANSPORT INHIBITOR RESPONSE 1-like            |
| MR4G029081.1 | TIR1-L    | Auxin | [Juglans regia]                                                                   |
|              |           |       | XP_018829906.1//PREDICTED: protein TRANSPORT INHIBITOR RESPONSE 1-like            |
| MR4G029089.1 | TIR1-L    | Auxin | [Juglans regia]                                                                   |
|              |           |       | XP_018829906.1//PREDICTED: protein TRANSPORT INHIBITOR RESPONSE 1-like            |
| MR4G029093.1 | TIR1-L    | Auxin | [Juglans regia]                                                                   |
|              |           |       | XP_015890760.1//PREDICTED: serine/threonine-protein kinase SAPK2 isoform X1       |
| MR0G006960.1 | SAPK2     | ABA   | [Ziziphus jujuba]                                                                 |
|              |           |       | XP_018850345.1//PREDICTED: two-component response regulator ARR12-like isoform X1 |
| MR0G018446.1 | ARR12     | CK    | [Juglans regia]                                                                   |
| MR0G024267.1 | IAA29     | Auxin | XP_018826739.1//PREDICTED: auxin-responsive protein IAA29-like [Juglans regia]    |

---

**Table S8.** List of hormone-related genes identified in the 7029 DEGs

| Gene ID             | Hormone         | Involved process            | Gene name  | Type          | log2(M0/F0) | log2(M1/F1) |
|---------------------|-----------------|-----------------------------|------------|---------------|-------------|-------------|
| MR6G029272.1        | Abscisic acid   | Hormone signal transduction | PP2C       | Female-biased | -9.471      | -6.5372     |
| MR6G029273.1        | Abscisic acid   | Hormone signal transduction | PP2C       | Female-biased | -4.1742     | -5.2316     |
| MR3G011095.1        | Auxin           | Hormone signal transduction | ARF        | Female-biased | -7.2393     | -13.697     |
| MR7G007520.1        | Auxin           | Hormone signal transduction | ARF        | Female-biased | -7.3132     | -7.9621     |
| MR4G010547.2        | Auxin           | Hormone signal transduction | ARF9       | Female-biased | -8.7051     | -9.5325     |
| MR1G027448.1        | Auxin           | Hormone biosynthesis        | YUC        | Female-biased | -7.8526     | -2.8105     |
| MR6G021603.1        | Auxin           | Hormone biosynthesis        | YUC        | Male-biased   | 1.3741      | 1.34733     |
| MR8G021802.1        | Auxin           | Hormone biosynthesis        | YUCCA      |               | -0.6731     | -1.3875     |
| MR8G025878.1        | Auxin           | Hormone response            | ARG7       | Female-biased | -8.7814     | -5.2316     |
| MR6G004324.1        | Auxin           | Hormone biosynthesis        | TDC        |               | -1.6422     | -0.7362     |
| MR1G018614.1        | Brassinosteroid | Hormone signal transduction | SERK2      | Male-biased   | 2.5924      | 2.21814     |
| MR2G000226.1        | Brassinosteroid | Hormone signal transduction | BZR1       |               | -1.0583     | -0.4134     |
| MR5G011874.1        | Brassinosteroid | Hormone signal transduction | BIM1       | Female-biased | -2.5267     | -2.0144     |
| MR5G011875.1        | Brassinosteroid | Hormone signal transduction | BIM1       | Male-biased   | 4.04855     | 7.58352     |
| MR5G013073.1        | Brassinosteroid | Hormone signal transduction | ASK7       | Male-biased   | 3.36837     | 3.13138     |
| MR7G008146.2        | Brassinosteroid | Hormone signal transduction | BAK1/SERK3 | Female-biased | -5.2789     | -4.3219     |
| MR3G026318.1        | Brassinosteroid | Hormone biosynthesis        | CYP90C1    | Female-biased | -2.3108     | -2.1396     |
| MR3G019062.1        | Cytokinin       | Hormone signal transduction | CYCD3-1    | Female-biased | -7.9965     | -5.7408     |
| MR0G027265.2        | Cytokinin       | Hormone biosynthesis        | LOG        | Female-biased | -6.3152     | -5.5112     |
| MR3G012354.1        | Cytokinin       | Hormone signal transduction | CRF5       | Female-biased | -1.5747     | -1.3338     |
| MR8G026761.1        | Cytokinin       | Hormone signal transduction | CKI1       | Female-biased | -1.0268     | -1.189      |
| MR8G019008.1        | Cytokinin       | Hormone signal transduction | AHP1       | Female-biased | -1.0486     | -1.2711     |
| MR0TCONS_00017483.1 | Ethylene        | Hormone biosynthesis        | ACO        | Male-biased   | 18.2093     | 18.2085     |
| MR3G008397.1        | Ethylene        | Hormone signal transduction | ETR        |               | -2.0674     | 6.31688     |
| MR7G012066.1        | Ethylene        | Hormone response            | ADH1       | Female-biased | -1.2797     | -3.4387     |
| MR1G003948.1        | Ethylene        | Hormone biosynthesis        | ETO1       | Female-biased | -8.4895     | -8.5941     |
| MR2G007010.1        | Ethylene        | Hormone signal transduction | ERF4       | Female-biased | -14.221     | -9.4565     |
| MR2G016358.1        | Ethylene        | Hormone biosynthesis        | ETO1       | Female-biased | -10.579     | -10.344     |
| MR4G016016.1        | Ethylene        | Hormone signal transduction | ERF5       | Female-biased | -3.0617     | -2.7395     |
| MR2G016675.1        | Ethylene        | Hormone signal transduction | EIN2       | Male-biased   | 5.05627     | 5.35994     |

|                     |                |                             |           |               |         |         |
|---------------------|----------------|-----------------------------|-----------|---------------|---------|---------|
| MR3G008350.2        | Ethylene       | Hormone biosynthesis        | ACO       | Female-biased | -1.1769 | -1.068  |
| MR3G008356.1        | Ethylene       | Hormone biosynthesis        | ACO       | Female-biased | -3.1296 | -4.5493 |
| MR3G008357.1        | Ethylene       | Hormone biosynthesis        | ACO       | Female-biased | -8.0572 | -8.2154 |
| MR8G021808.1        | Jasmonic acid  | Hormone response            | TIFY 10A  | Female-biased | -9.1291 | -10.756 |
| MR5G017092.1        | Jasmonic acid  | Hormone biosynthesis        | MFP2      | Female-biased | -2.8516 | -3.7161 |
| MR6G007069.1        | Jasmonic acid  | Hormone signal transduction | bHLH3     |               | -0.8699 | -1.0583 |
| MR6G022827.1        | Jasmonic acid  | Hormone response            | TIFY10A   |               | 0.97303 | 2.73698 |
| MR0G007890.1        | Jasmonic acid  | Hormone signal transduction | MYB108    | Male-biased   | 1.16324 | 1.98043 |
| MR0TCONS_00032219.1 | Salicylic acid | Hormone biosynthesis        | UGT       |               | 1.46425 | 0.3629  |
| MR7G015242.1        | Salicylic acid | Hormone biosynthesis        | UGT       | Female-biased | -1.3401 | -1.4132 |
| MR8G002372.1        | Salicylic acid | Hormone biosynthesis        | SAMT      |               | 1.70216 | 0.40129 |
| MR8G010075.1        | Salicylic acid | Hormone biosynthesis        | UGT       | Male-biased   | 1.27143 | 1.73038 |
| MR8G027413.1        | Salicylic acid | Hormone biosynthesis        | UGT       |               | -1.2715 | 0.70812 |
| MR1G005704.1        | Salicylic acid | Hormone biosynthesis        | UGT       | Female-biased | -1.2621 | -2.153  |
| MR2G009173.1        | Salicylic acid | Hormone biosynthesis        | UGT       | Female-biased | -9.4838 | -6.7737 |
| MR2G009177.1        | Salicylic acid | Hormone biosynthesis        | UGT       | Female-biased | -5.9632 | -5.7835 |
| MR2G025731.1        | Salicylic acid | Hormone biosynthesis        | UGT       | Female-biased | -6.8916 | -6.6193 |
| MR3G026042.1        | Salicylic acid | Hormone biosynthesis        | UGT       |               | -1.1643 | -0.9663 |
| MR4G020673.1        | Salicylic acid | Hormone biosynthesis        | UGT       | Male-biased   | 9.66069 | 8.26327 |
| MR5G011885.1        | Salicylic acid | Hormone biosynthesis        | UGT       |               | -1.5007 | -0.6195 |
| MR5G027230.1        | Salicylic acid | Hormone biosynthesis        | UGT       | Male-biased   | 5.33241 | 6.1863  |
| MR7G010685.1        | Salicylic acid | Hormone response            | PR1-like  | Female-biased | -5.5395 | -6.3663 |
| MR3G026572.1        | Abscisic acid  | Hormone signal transduction | WIN1      | Male-biased   | 2.11979 | 1.00137 |
| MR7G012917.1        | Abscisic acid  | Hormone signal transduction | WIN1      | Male-biased   | 1.54707 | 1.41088 |
| MR1G027085.1        | Abscisic acid  | Hormone biosynthesis        | NCED      |               | -1.757  | 2.73235 |
| MR0G027092.1        | Abscisic acid  | Hormone biosynthesis        | NCED      |               | -1.757  | 2.73235 |
| MR4G022374.1        | Abscisic acid  | Hormone receptor            | PYL8-L    | Female-biased | -1.4883 | -1.6179 |
| MR5G003275.1        | Abscisic acid  | Hormone biosynthesis        | ABA1/ZEP1 |               | -1.8828 | -0.733  |
| MR0G006960.1        | Abscisic acid  | Hormone signal transduction | SAPK2     |               | 0.1635  | 1.07846 |
| MR5G022121.1        | Abscisic acid  | Hormone signal transduction | SAPK10    | Female-biased | -4.2816 | -6.8864 |
| MR7G007481.1        | Abscisic acid  | Hormone signal transduction | ABF4      |               | -2.426  | 0.83586 |
| MR7G011459.2        | Abscisic acid  | Hormone signal transduction | SRK2E     | Female-biased | -1.3472 | -1.2869 |
| MR8G011177.1        | Abscisic acid  | Hormone biosynthesis        | NCED      | Male-biased   | 1.71017 | 2.32974 |

|                     |               |                             |        |               |         |         |
|---------------------|---------------|-----------------------------|--------|---------------|---------|---------|
| MR3G014767.1        | Abscisic acid | Hormone metabolism          | PP2CA  | Female-biased | -1.0772 | -1.0295 |
| MR4G024721.1        | Abscisic acid | Hormone response            | ASR2   | Male-biased   | 5.84906 | 2.78529 |
| MR6G019840.1        | Abscisic acid | Hormone biosynthesis        | ABA3   |               | -0.7602 | -1.8383 |
| MR7G014396.1        | Abscisic acid | Hormone signal transduction | PP2C51 |               | -1.0285 | 0.76367 |
| MR3G018668.1        | Auxin         | Hormone signal transduction | ARF18  | Female-biased | -1.0601 | -1.2453 |
| MR5G024618.1        | Auxin         | Hormone signal transduction | ARF19  |               | -0.0425 | 1.07621 |
| MR2G027556.1        | Auxin         | Hormone signal transduction | ARF6   |               | -0.1926 | -1.4381 |
| MR5G027067.1        | Auxin         | Hormone response            | ARG7   |               | 0.05367 | -1.4755 |
| MR7G012941.1        | Auxin         | Hormone signal transduction | AUX1   | Female-biased | -8.6144 | -3.3923 |
| MR7G028105.1        | Auxin         | Hormone signal transduction | AUX1   | Female-biased | -8.6144 | -3.3923 |
| MR2G004927.1        | Auxin         | Hormone response            | AUX15A |               | 4.66653 | -0.0857 |
| MR6G011287.1        | Auxin         | Hormone response            | AUX22D |               | 4.13945 | -0.4541 |
| MR6G022742.1        | Auxin         | Hormone signal transduction | bZIP53 |               | 0.93988 | 1.63194 |
| MR3G001277.1        | Auxin         | Hormone response            | CRY1   |               | 1.21193 | 0.14179 |
| MR1G014923.1        | Auxin         | Hormone signal transduction | GH3.1  | Male-biased   | 1.6289  | 2.07012 |
| MR4G020436.1        | Auxin         | Hormone signal transduction | GH3.1  | Male-biased   | 1.23024 | 1.61889 |
| MR7G022672.1        | Auxin         | Hormone signal transduction | GH3.1  |               | -0.51   | 1.12008 |
| MR6G011335.1        | Auxin         | Hormone signal transduction | GH3.6  | Female-biased | -1.5274 | -1.5018 |
| MR8G002059.1        | Auxin         | Hormone signal transduction | GH3.9  | Male-biased   | 7.64035 | 8.5394  |
| MR3G001167.1        | Auxin         | Hormone signal transduction | IAA13  | Female-biased | -3.5826 | -2.9732 |
| MR3G014515.1        | Auxin         | Hormone signal transduction | IAA14  | Male-biased   | 1.49823 | 1.40291 |
| MR0G024267.1        | Auxin         | Hormone signal transduction | IAA29  |               | -0.7131 | -1.5284 |
| MR7G018915.1        | Auxin         | Hormone signal transduction | IAA16  |               | 1.85383 | 0.20599 |
| MR7G017780.1        | Auxin         | Hormone signal transduction | IAA32  |               | -0.6464 | 1.12119 |
| MR8G016437.1        | Auxin         | Hormone signal transduction | IAA33  | Male-biased   | 3.21402 | 1.85207 |
| MR3G014514.1        | Auxin         | Hormone signal transduction | IAA4   |               | 0.59864 | -3.3042 |
| MR3G026487.1        | Auxin         | Hormone response            | IAA6   |               | -1.2876 | 1.36125 |
| MR4G025315.1        | Auxin         | Hormone signal transduction | MAKR2  | Female-biased | -1.5195 | -1.2605 |
| MR1G009013.1        | Auxin         | Hormone signal transduction | SAUR   | Female-biased | -4.7779 | -2.7188 |
| MR4G016064.1        | Auxin         | Hormone signal transduction | SAUR   |               | 1.05235 | 0.26303 |
| MR4G021266.1        | Auxin         | Hormone signal transduction | SAUR   | Female-biased | -1.3459 | -1.1642 |
| MR7TCONS_00006944.1 | Auxin         | Hormone signal transduction | SAUR21 |               | 4.42552 |         |
| MR3G026193.1        | Auxin         | Hormone signal transduction | SAUR41 |               | -0.4516 | -1.2633 |

|              |                 |                             |           |               |         |         |
|--------------|-----------------|-----------------------------|-----------|---------------|---------|---------|
| MR2G006882.2 | Auxin           | Hormone signal transduction | TIR1-L    |               | -1.1933 | -0.9051 |
| MR4G029081.1 | Auxin           | Hormone signal transduction | TIR1-L    |               | 0.03768 | 1.1505  |
| MR4G029089.1 | Auxin           | Hormone signal transduction | TIR1-L    |               | 0.03768 | 1.1505  |
| MR4G029093.1 | Auxin           | Hormone signal transduction | TIR1-L    |               | 0.03405 | 1.11793 |
| MR0G002592.1 | Auxin           | Hormone biosynthesis        | YUCCA     |               | -0.2176 | -1.6657 |
| MR3G009824.1 | Brassinosteroid | Hormone signal transduction | BKI1      |               | -0.3452 | -1.2274 |
| MR1G029229.1 | Cytokinin       | Hormone signal transduction | ARR       |               | -1.4144 | -0.2622 |
| MR0G018446.1 | Cytokinin       | Hormone signal transduction | ARR12     |               | -0.4344 | -1.3707 |
| MR2G005198.1 | Cytokinin       | Hormone biosynthesis        | CKX1      | Female-biased | -2.1184 | -3.7545 |
| MR2G024054.1 | Cytokinin       | Hormone signal transduction | CYCD3-1   | Female-biased | -1.5986 | -2.2838 |
| MR8G002759.1 | Cytokinin       | Hormone biosynthesis        | LOG       | Female-biased | -1.5709 | -2.927  |
| MR4G018351.1 | Cytokinin       | Hormone signal transduction | ARR       |               | -1.0445 | 0.53653 |
| MR5G017155.1 | Cytokinin       | Hormone signal transduction | ARR       |               | -1.0024 | -0.3559 |
| MR7G022722.1 | Cytokinin       | Hormone signal transduction | CYCD3-1   | Male-biased   | 9.23437 | 8.2527  |
| MR7G022723.1 | Cytokinin       | Hormone signal transduction | CYCD3-1   | Female-biased | -1.1435 | -2.807  |
| MR7G024824.1 | Cytokinin       | Hormone signal transduction | ARR       | Male-biased   | 6.14066 | 5.74429 |
| MR7G028512.1 | Cytokinin       | Hormone signal transduction | CYCD3-1   | Male-biased   | 2.38431 | 1.89896 |
| MR7G015191.1 | Cytokinin       | Hormone signal transduction | CRF4      | Female-biased | -1.2553 | -1.8152 |
| MR8G022212.1 | Cytokinin       | Hormone signal transduction | CRF2      | Female-biased | -1.0704 | -1.8954 |
| MR0G003179.1 | Cytokinin       | Hormone signal transduction | CRF5-LIKE | Female-biased | -1.5564 | -1.3338 |
| MR8G027691.1 | Cytokinin       | Hormone biosynthesis        | LOG       |               | -2.0339 | -0.8745 |
| MR1G003950.1 | Ethylene        | Hormone biosynthesis        | ETO1      | Female-biased | -1.9647 | -3.0776 |
| MR1G018593.1 | Ethylene        | Hormone signal transduction | EIN3      | Female-biased | -1.1486 | -1.1046 |
| MR3G009444.1 | Ethylene        | Hormone signal transduction | RTE1      | Female-biased | -1.0206 | -1.0027 |
| MR3G026169.1 | Ethylene        | Hormone signal transduction | RAP2-12   |               | -1.1834 | -0.0861 |
| MR3G026789.1 | Ethylene        | Hormone response            | ADH1      | Male-biased   | 1.04701 | 1.09747 |
| MR6G009324.1 | Ethylene        | Hormone biosynthesis        | ACO       | Male-biased   | 2.43294 | 2.80401 |
| MR6G029280.1 | Ethylene        | Hormone signal transduction | ERF4      |               | -1.7151 | 0.1293  |
| MR7G007527.1 | Ethylene        | Hormone response            | ERS       | Female-biased | -1.1656 | -1.0688 |
| MR7G012067.1 | Ethylene        | Hormone response            | ADH1      |               | 1.63141 | -0.102  |
| MR8G012695.1 | Ethylene        | Hormone signal transduction | EBF1/2    |               | -1.4529 | -0.0554 |
| MR8G026853.1 | Ethylene        | Hormone response            | ERF       |               | -1.7151 | 0.1293  |
| MR3G008378.1 | Ethylene        | Hormone biosynthesis        | ACO       |               | -0.4396 | -1.4025 |

|              |                |                             |               |               |         |         |
|--------------|----------------|-----------------------------|---------------|---------------|---------|---------|
| MR8G004987.1 | Ethylene       | Hormone signal transduction | EIN3          |               | -0.3139 | 2.05285 |
| MR2G005456.1 | Ethylene       | Hormone biosynthesis        | ACO           |               | -0.8253 | -1.2361 |
| MR3G008359.1 | Ethylene       | Hormone biosynthesis        | ACO           |               | -0.5659 | -1.1052 |
| MR7G004138.1 | Gibberellin    | Hormone signal transduction | ESR2          |               | 1.16306 | 0.4397  |
| MR6G021506.1 | Gibberellin    | Hormone signal transduction | GAI           | Male-biased   | 1.51504 | 1.12346 |
| MR1G002326.1 | Gibberellin    | Hormone response            | RPPL1         |               | -1.8261 | -0.4073 |
| MR1G022996.1 | Gibberellin    | Hormone response            | RPPL1         | Female-biased | -1.8642 | -1.17   |
| MR1G029366.2 | Gibberellin    | Hormone response            | RPPL1         | Female-biased | -1.7274 | -1.2982 |
| MR2G005641.1 | Gibberellin    | Hormone biosynthesis        | GA2ox2        | Female-biased | -1.1717 | -1.2116 |
| MR4G018381.1 | Gibberellin    | Hormone response            | CIGR1         |               | -1.4363 | 0.87884 |
| MR5G010169.1 | Gibberellin    | Hormone response            | GASA14        |               | 4.48588 |         |
| MR6G010478.1 | Gibberellin    | Hormone signal transduction | SLN1          |               | 1.29238 | 0.55386 |
| MR6G019831.1 | Gibberellin    | Hormone biosynthesis        | GA20ox        |               | 1.15402 | -1.4537 |
| MR7G017861.1 | Gibberellin    | Hormone signal transduction | bHLH48        |               | -1.1139 | -0.6303 |
| MR1G027577.1 | Gibberellin    | Hormone biosynthesis        | KAO           |               | -0.826  | -1.1782 |
| MR7G028053.1 | Gibberellin    | Hormone signal transduction | GAIP-like     |               | -0.0062 | -1.1663 |
| MR5G010168.1 | Gibberellin    | Hormone response            | <b>GASA4</b>  |               | 0.74582 | 1.23166 |
| MR6G013934.1 | Gibberellin    | Hormone response            | <b>GASA14</b> |               | -0.395  | -1.4872 |
| MR6G022829.1 | Jasmonic acid  | Hormone response            | TIFY 10A      |               | -2.2416 | 7.60924 |
| MR7G002983.1 | Jasmonic acid  | Hormone response            | TIFY 10A      | Female-biased | -9.231  | -6.905  |
| MR7G011529.1 | Jasmonic acid  | Hormone biosynthesis        | AOS           |               | -1.448  | 0.16378 |
| MR3G009918.1 | Jasmonic acid  | Hormone signal transduction | MYC2          |               | -1.1506 | -0.0368 |
| MR3G014474.2 | Jasmonic acid  | Hormone response            | TIFY 4B       | Male-biased   | 3.23893 | 3.59722 |
| MR5G021935.1 | Jasmonic acid  | Hormone signal transduction | MYB108        |               | -1.4256 | -0.1038 |
| MR5G024985.1 | Jasmonic acid  | Hormone response            | TIFY 6B       | Female-biased | -1.2017 | -1.2068 |
| MR6G021641.1 | Jasmonic acid  | Hormone biosynthesis        | AOC           | Male-biased   | 11.3976 | 11.7652 |
| MR7G002984.2 | Jasmonic acid  | Hormone response            | TIFY 10A      | Female-biased | -2.4903 | -1.2019 |
| MR7G012609.1 | Jasmonic acid  | Hormone response            | TIFY 10A      | Female-biased | -8.583  | -8.2747 |
| MR8G002373.1 | Salicylic acid | Hormone biosynthesis        | SAMT          | Male-biased   | 7.39831 | 10.1464 |
| MR8G010072.1 | Salicylic acid | Hormone biosynthesis        | UGT           | Female-biased | -1.3994 | -2.8599 |
| MR8G010076.1 | Salicylic acid | Hormone biosynthesis        | UGT           | Male-biased   | 2.52582 | 5.24179 |
| MR2G026920.1 | Salicylic acid | Hormone response            | PR1           |               | -0.0466 | 3.1083  |

**Table S9.** List of hormone-related genes specifically expressed in males and females.

| Gene ID             | F0     | F1     | M0    | M1    | Hormone          | Involved process            | Gene name | Specific expressed | log2(M0/F0) | log2(M1/F1) |
|---------------------|--------|--------|-------|-------|------------------|-----------------------------|-----------|--------------------|-------------|-------------|
| MR6G029272.1        | 6.91   | 5.95   | 0     | 0     |                  | Hormone signal transduction | PP2C      | Female             | -9.471      | -6.5372     |
| MR6G029273.1        | 4.24   | 2.93   | 0     | 0     | Absciscic acid   | transduction                | PP2C      | Female             | -4.1742     | -5.2316     |
| MR3G011095.1        | 73.05  | 55.63  | 0     | 0     | Auxin            | transduction                | ARF       | Female             | -7.2393     | -13.697     |
| MR7G007520.1        | 22.86  | 33.53  | 0     | 0     | Auxin            | transduction                | ARF       | Female             | -7.3132     | -7.9621     |
| MR4G010547.2        | 35.01  | 52.79  | 0     | 0     | Auxin            | transduction                | ARF9      | Female             | -8.7051     | -9.5325     |
| MR1G027448.1        | 3.33   | 1.00   | 0     | 0     | Auxin            | Hormone biosynthesis        | YUC       | Female             | -7.8526     | -2.8105     |
| MR3G026318.1        | 1.56   | 1.44   | 0     | 0     | Brassinostero id | Hormone biosynthesis        | CYP90C1   | Female             | -2.3108     | -2.1396     |
| MR3G019062.1        | 5.62   | 7.34   | 0     | 0     | Cytokinin        | Hormone signal transduction | CYCD3-1   | Female             | -7.9965     | -5.7408     |
| MR0G027265.2        | 6.59   | 6.69   | 0     | 0     | Cytokinin        | Hormone biosynthesis        | LOG       | Female             | -6.3152     | -5.5112     |
| MR1G003948.1        | 1.10   | 1.18   | 0     | 0     | Ethylene         | Hormone biosynthesis        | ETO1      | Female             | -8.4895     | -8.5941     |
| MR2G007010.1        | 357.13 | 259.87 | 0     | 0     | Ethylene         | Hormone signal transduction | ERF4      | Female             | -14.221     | -9.4565     |
| MR2G016358.1        | 6.19   | 5.23   | 0     | 0     | Ethylene         | Hormone biosynthesis        | ETO1      | Female             | -10.579     | -10.344     |
| MR3G008357.1        | 2.97   | 3.30   | 0     | 0     | Ethylene         | Hormone biosynthesis        | ACO       | Female             | -8.0572     | -8.2154     |
| MR8G021808.1        | 16.66  | 15.98  | 0     | 0     | Jasmonic acid    | Hormone response            | TIFY10A   | Female             | -9.1291     | -10.756     |
| MR2G009173.1        | 7.52   | 11.71  | 0     | 0     | Salicylic acid   | Hormone biosynthesis        | UGT       | Female             | -9.4838     | -6.7737     |
| MR2G009177.1        | 1.87   | 1.63   | 0     | 0     | Salicylic acid   | Hormone biosynthesis        | UGT       | Female             | -5.9632     | -5.7835     |
| MR2G025731.1        | 2.89   | 2.28   | 0     | 0     | Salicylic acid   | Hormone biosynthesis        | UGT       | Female             | -6.8916     | -6.6193     |
| MR7G010685.1        | 14.21  | 17.07  | 0     | 0     | Salicylic acid   | Hormone response            | PR1-like  | Female             | -5.5395     | -6.3663     |
| MR5G011875.1        | 0      | 0      | 3.24  | 1.98  | Brassinostero id | Hormone signal transduction | BIM1      | Male               | 4.04855     | 7.58352     |
| MR0TCONS_00017483.1 | 0      | 0      | 30.31 | 30.29 | Ethylene         | Hormone biosynthesis        | ACO       | Male               | 18.2093     | 18.2085     |
| MR2G016675.1        | 0      | 0      | 11.32 | 10.17 | Ethylene         | Hormone signal transduction | EIN2      | Male               | 5.05627     | 5.35994     |
| MR4G020673.1        | 0      | 0      | 6.75  | 2.60  | Salicylic acid   | Hormone biosynthesis        | UGT       | Male               | 9.66069     | 8.26327     |
| MR5G027230.1        | 0      | 0      | 2.26  | 2.08  | Salicylic acid   | Hormone biosynthesis        | UGT       | Male               | 5.33241     | 6.1863      |
| MR8G002059.1        | 0      | 0      | 1.33  | 2.54  | Auxin            | Hormone signal transduction | GH3.9     | Male               | 7.64035     | 8.5394      |
| MR7G022722.1        | 0      | 0      | 6.68  | 3.44  | Cytokinin        | Hormone signal transduction | CYCD3-1   | Male               | 9.23437     | 8.2527      |
| MR7G024824.1        | 0      | 0      | 3.21  | 3.31  | Cytokinin        | Hormone signal transduction | ARR       | Male               | 6.14066     | 5.74429     |
| MR6G009324.1        | 0      | 0      | 2.71  | 1.67  | Ethylene         | Hormone biosynthesis        | ACO       | Male               | 2.43294     | 2.80401     |
| MR6G021641.1        | 0      | 0      | 45.12 | 59.29 | Jasmonic acid    | Hormone biosynthesis        | AOC       | Male               | 11.3976     | 11.7652     |

**Table S10.** List of transcription factors identified in the 7029 DEGs

| Gene ID             | Family     | log2(M0/F0) | log2(M1/F1) | Type          |
|---------------------|------------|-------------|-------------|---------------|
| MR8G002609.1        | ABI3VP1    | -1.85153    | -3.25403    | Female-biased |
| MR8G002610.1        | ABI3VP1    | -1.38193    | -1.44051    | Female-biased |
| MR7G011421.1        | ABI3VP1    | 6.784478    | 6.631908    | Male-biased   |
| MR1TCONS_00049818.1 | ABI3VP1    | 2.043654    | 0.47063     |               |
| MR6G025263.1        | Alfin-like | -5.26195    | -10.1966    | Female-biased |
| MR7G011647.1        | Alfin-like | -3.00529    | -3.21342    | Female-biased |
| MR7G011644.1        | Alfin-like | -2.41654    | -3.08635    | Female-biased |
| MR2G028929.1        | Alfin-like | -2.28369    | -1.59667    | Female-biased |
| MR6G016510.1        | Alfin-like | 1.626387    | 0.290219    |               |
| MR8G022041.1        | AP2-EREBP  | -7.99849    | -9.65651    | Female-biased |
| MR2G007010.1        | AP2-EREBP  | -14.2213    | -9.4565     | Female-biased |
| MR0G006452.1        | AP2-EREBP  | -8.50078    | -8.64802    | Female-biased |
| MR0G003706.1        | AP2-EREBP  | -5.79265    | -5.70814    | Female-biased |
| MR1G017646.1        | AP2-EREBP  | -5.7735     | -4.40464    | Female-biased |
| MR7G010715.1        | AP2-EREBP  | -1.20645    | -2.86898    | Female-biased |
| MR4G016016.1        | AP2-EREBP  | -3.06168    | -2.73949    | Female-biased |
| MR8G022212.1        | AP2-EREBP  | -1.07036    | -1.89537    | Female-biased |
| MR7G015191.1        | AP2-EREBP  | -1.25528    | -1.81519    | Female-biased |
| MR8G004033.1        | AP2-EREBP  | -1.85512    | -1.69751    | Female-biased |
| MR8G016432.1        | AP2-EREBP  | -1.47117    | -1.58423    | Female-biased |
| MR6G019855.1        | AP2-EREBP  | -2.42212    | -1.56417    | Female-biased |
| MR3G026243.1        | AP2-EREBP  | -0.40715    | -1.49168    |               |
| MR3G012354.1        | AP2-EREBP  | -1.57469    | -1.33377    | Female-biased |
| MR0G003179.1        | AP2-EREBP  | -1.57469    | -1.33377    | Female-biased |
| MR6G011327.1        | AP2-EREBP  | -1.02542    | -1.24461    | Female-biased |
| MR7G013560.1        | AP2-EREBP  | -1.23729    | -1.14375    | Female-biased |
| MR3G026572.1        | AP2-EREBP  | 2.119789    | 1.001365    | Male-biased   |
| MR6G011303.1        | AP2-EREBP  | 1.45236     | 1.300009    | Male-biased   |
| MR6G022510.1        | AP2-EREBP  | 1.45236     | 1.300009    | Male-biased   |
| MR1TCONS_00000352.1 | AP2-EREBP  | -1.78163    | 1.410138    |               |
| MR7G012917.1        | AP2-EREBP  | 1.547074    | 1.41088     | Male-biased   |
| MR4G028420.1        | AP2-EREBP  | -0.875      | 1.512286    |               |
| MR8G002354.1        | AP2-EREBP  | 1.020806    | 2.108017    | Male-biased   |
| MR8G012748.1        | AP2-EREBP  | 1.539975    | 2.523333    | Male-biased   |
| MR5G020824.1        | AP2-EREBP  | -0.46613    | 2.645597    |               |
| MR3G017004.1        | AP2-EREBP  | -0.96864    | 2.958566    |               |
| MR0G007153.1        | AP2-EREBP  | 3.940433    | 4.132536    | Male-biased   |
| MR4G021147.1        | AP2-EREBP  | 0.247381    | 4.259619    |               |
| MR4G021148.1        | AP2-EREBP  | -1.73725    | -0.15486    |               |
| MR6G029280.1        | AP2-EREBP  | -1.71506    | 0.129297    |               |
| MR8G026853.1        | AP2-EREBP  | -1.71506    | 0.129297    |               |
| MR6G019672.2        | AP2-EREBP  | -1.6737     | -0.03261    |               |
| MR4G016017.1        | AP2-EREBP  | -1.59949    | -0.57003    |               |
| MR6G019607.1        | AP2-EREBP  | -1.39414    | -0.6713     |               |
| MR3G026169.1        | AP2-EREBP  | -1.18337    | -0.08615    |               |
| MR8G003355.1        | AP2-EREBP  | -1.01315    | -0.83199    |               |
| MR7G004138.1        | AP2-EREBP  | 1.163057    | 0.4397      |               |
| MR3G011095.1        | ARF        | -7.23927    | -13.6966    | Female-biased |

|                     |       |          |          |               |
|---------------------|-------|----------|----------|---------------|
| MR4G010547.2        | ARF   | -8.70508 | -9.5325  | Female-biased |
| MR7G007520.1        | ARF   | -7.31323 | -7.96211 | Female-biased |
| MR2G027556.1        | ARF   | -0.19262 | -1.43813 |               |
| MR3G018668.1        | ARF   | -1.06015 | -1.24527 | Female-biased |
| MR5G024618.1        | ARF   | -0.04247 | 1.076211 |               |
| MR4G010937.1        | ARR-B | -7.8639  | -10.8964 | Female-biased |
| MR8G012754.1        | ARR-B | -1.98753 | -1.6918  | Female-biased |
| MR0G018446.1        | ARR-B | -0.42555 | -1.37074 |               |
| MR5G017155.1        | ARR-B | -1.00243 | -0.35593 |               |
| MR2G000226.1        | BES1  | -1.05833 | -0.41339 |               |
| MR5G023951.1        | BET   | -0.80877 | -1.37107 |               |
| MR6G025606.1        | BET   | -1.30478 | -1.09809 | Female-biased |
| MR1G020885.1        | bHLH  | -7.51928 | -10.4511 | Female-biased |
| MR6G026964.1        | bHLH  | -4.53719 | -4.79464 | Female-biased |
| MR7G020473.2        | bHLH  | -4.28014 | -3.86179 | Female-biased |
| MR4G016077.1        | bHLH  | 3.420044 | -3.77364 |               |
| MR4G016082.1        | bHLH  | 3.420044 | -3.77364 |               |
| MR2G024394.1        | bHLH  | -3.27877 | -3.15063 | Female-biased |
| MR4G009030.1        | bHLH  | -2.52658 | -3.07265 | Female-biased |
| MR8TCONS_00067952.1 | bHLH  | -3.04209 | -2.83773 | Female-biased |
| MR4G026989.1        | bHLH  | -1.38959 | -2.18507 | Female-biased |
| MR5G013412.3        | bHLH  | -1.61887 | -2.16854 | Female-biased |
| MR7G000141.1        | bHLH  | -0.08694 | -2.11803 |               |
| MR5G011874.1        | bHLH  | -2.52672 | -2.01443 | Female-biased |
| MR8TCONS_00046257.1 | bHLH  | 0.343365 | -1.39784 |               |
| MR0G008506.1        | bHLH  | -1.05339 | -1.32361 | Female-biased |
| MR2G024128.1        | bHLH  | 0.528519 | -1.20542 |               |
| MR3TCONS_00023541.1 | bHLH  | 0.454939 | -1.16054 |               |
| MR7G017853.1        | bHLH  | -1.34199 | -1.07496 | Female-biased |
| MR7G011614.1        | bHLH  | -0.31229 | -1.06354 |               |
| MR6G007069.1        | bHLH  | -0.86988 | -1.05825 |               |
| MR0G006365.1        | bHLH  | 0.541709 | -1.00642 |               |
| MR4G027355.1        | bHLH  | -0.78755 | 1.144246 |               |
| MR0G004582.1        | bHLH  | -0.89038 | 1.289587 |               |
| MR5G010392.1        | bHLH  | 1.126448 | 1.949002 | Male-biased   |
| MR3G008418.1        | bHLH  | -0.61478 | 2.147814 |               |
| MR5G025391.1        | bHLH  | -0.43229 | 2.164366 |               |
| MR5G011875.1        | bHLH  | 4.04855  | 7.583524 | Male-biased   |
| MR5G004903.1        | bHLH  | 4.245559 | 7.881823 | Male-biased   |
| MR6G001563.1        | bHLH  | 8.662568 | 8.17448  | Male-biased   |
| MR8G020751.1        | bHLH  | 8.662568 | 8.17448  | Male-biased   |
| MR8G004382.1        | bHLH  | -3.30958 | -0.77409 |               |
| MR0G007712.1        | bHLH  | -1.83178 | -0.46116 |               |
| MR8G004392.1        | bHLH  | -1.29377 | -0.44012 |               |
| MR3G009918.1        | bHLH  | -1.15065 | -0.03676 |               |
| MR7G017861.1        | bHLH  | -1.11395 | -0.63029 |               |
| MR2G019409.1        | bHLH  | -1.02304 | -0.88356 |               |
| MR0G002577.1        | bHLH  | 3.708077 | -0.03248 |               |
| MR5G027234.1        | BSD   | -2.0332  | -2.22949 | Female-biased |
| MR6G022953.1        | BSD   | 2.985551 | 3.405452 | Male-biased   |

|                     |              |          |          |               |
|---------------------|--------------|----------|----------|---------------|
| MR5G024502.1        | BSD          | 2.696995 | 0.701965 |               |
| MR0G027044.1        | BSD          | 2.696995 | 0.701965 |               |
| MR1G015007.1        | bZIP         | -1.95842 | -2.0696  | Female-biased |
| MR7G012492.1        | bZIP         | -0.76276 | 1.354133 |               |
| MR1G009147.1        | bZIP         | 0.678651 | 1.623851 |               |
| MR6G022742.1        | bZIP         | 0.939883 | 1.631941 |               |
| MR8G020207.1        | bZIP         | -0.97954 | 2.351967 |               |
| MR1G007787.1        | bZIP         | 4.77322  | 4.647635 | Male-biased   |
| MR8G028135.1        | bZIP         | -1.38524 | -0.64738 |               |
| MR6G011275.1        | bZIP         | 1.690333 | 0.745053 |               |
| MR8G001953.1        | bZIP         | 3.392352 | 0.549983 |               |
| MR6G018079.1        | C2C2-CO-like | -8.17679 | -10.1009 | Female-biased |
| MR3G018958.1        | C2C2-CO-like | -11.4287 | -8.96822 | Female-biased |
| MR1G003361.1        | C2C2-CO-like | 0.036681 | 1.361655 |               |
| MR0G022997.1        | C2C2-CO-like | 1.413074 | 1.781265 | Male-biased   |
| MR8G027384.1        | C2C2-CO-like | 11.98149 | 11.90509 | Male-biased   |
| MR8G028280.1        | C2C2-CO-like | -1.03577 | -0.27221 |               |
| MR5G011870.1        | C2C2-Dof     | -6.81564 | -7.94453 | Female-biased |
| MR7G014897.1        | C2C2-Dof     |          | -6.78764 |               |
| MR3G009872.2        | C2C2-Dof     | -7.1337  | -6.12078 | Female-biased |
| MR5G022127.1        | C2C2-Dof     | -1.18097 | -1.81652 | Female-biased |
| MR7G016761.1        | C2C2-Dof     | -0.44849 | -1.43448 |               |
| MR2G021710.1        | C2C2-Dof     | -6.74898 | #NUM!    |               |
| MR6G010822.1        | C2C2-GATA    | -8.81252 | -8.47872 | Female-biased |
| MR8G003329.4        | C2C2-GATA    | -0.5853  | -1.54669 |               |
| MR4G001510.1        | C2C2-GATA    | -0.19898 | 1.520769 |               |
| MR3G018666.1        | C2C2-GATA    | 6.93141  | 8.539027 | Male-biased   |
| MR0G018656.1        | C2C2-GATA    | 6.93141  | 8.539027 | Male-biased   |
| MR7G007143.1        | C2C2-GATA    | 10.5785  | 11.4618  | Male-biased   |
| MR7G007144.1        | C2C2-GATA    | -1.57326 | -0.29709 |               |
| MR3G009449.2        | C2C2-GATA    | -1.46801 | -0.81531 |               |
| MR1G005677.1        | C2C2-YABBY   | 2.222573 | -4.50244 |               |
| MR1G005676.1        | C2C2-YABBY   | -9.37387 | -3.23821 | Female-biased |
| MR4G021270.1        | C2C2-YABBY   | 0.021283 | -1.07775 |               |
| MR2G002020.1        | C2H2         | -5.1245  | -5.5756  | Female-biased |
| MR7G011412.1        | C2H2         | -5.21421 | -4.11575 | Female-biased |
| MR0G008582.1        | C2H2         | -2.16517 | -2.24179 | Female-biased |
| MR6G013676.1        | C2H2         | -0.82261 | -1.59921 |               |
| MR0TCONS_00064383.1 | C2H2         | -0.23704 | -1.47525 |               |
| MR6G019724.1        | C2H2         | -1.33122 | -1.41996 | Female-biased |
| MR7G000378.1        | C2H2         | -0.51363 | -1.1949  |               |
| MR7G000383.1        | C2H2         | -0.51363 | -1.1949  |               |
| MR3G026299.1        | C2H2         | -0.0362  | -1.09431 |               |
| MR6G009098.1        | C2H2         | -0.41087 | -1.0717  |               |
| MR2G000513.1        | C2H2         | 1.359404 | 3.50234  | Male-biased   |
| MR7G001351.1        | C2H2         | -1.21315 | 0.174025 |               |
| MR4TCONS_00019216.1 | C2H2         | -1.03391 | -0.71573 |               |
| MR5G017611.1        | C2H2         | -1.01505 | -0.51375 |               |
| MR2G025885.1        | C3H          | -8.1073  | -8.34203 | Female-biased |
| MR6G019909.1        | C3H          | -8.1073  | -8.34203 | Female-biased |

|              |         |          |          |               |
|--------------|---------|----------|----------|---------------|
| MR1G014006.2 | C3H     | -5.89959 | -5.45397 | Female-biased |
| MR5G003404.2 | C3H     | -5.173   | -4.30782 | Female-biased |
| MR8G007629.3 | C3H     | -0.87872 | -1.60592 |               |
| MR1G008453.1 | C3H     | -1.20007 | -1.33837 | Female-biased |
| MR5G001015.1 | C3H     | 2.318869 | -1.2475  |               |
| MR7G007732.1 | C3H     | -0.74937 | -1.05784 |               |
| MR5G010200.1 | C3H     | 1.33161  | 1.085875 | Male-biased   |
| MR6G029282.1 | C3H     | -0.45107 | 1.165781 |               |
| MR4G021029.1 | C3H     | 1.384982 | 1.489071 | Male-biased   |
| MR1G007794.2 | C3H     | 1.844099 | 1.939494 | Male-biased   |
| MR1G017406.1 | C3H     | -1.90408 | -0.99476 |               |
| MR0G007920.1 | C3H     | -1.70241 | -0.97331 |               |
| MR1G021678.3 | C3H     | -1.63341 | -0.91876 |               |
| MR1G017680.1 | C3H     | -1.39075 | -0.73318 |               |
| MR3G012196.1 | C3H     | -1.07733 | -0.04131 |               |
| MR3G014865.1 | C3H     | -1.07733 | -0.04131 |               |
| MR3G012175.1 | C3H     | -1.07653 | -0.08154 |               |
| MR6G013360.1 | CAMTA   | -1.26577 | -0.84189 |               |
| MR8G014168.2 | CPP     | -0.47032 | -1.74021 |               |
| MR6G016114.2 | CPP     | -1.47233 | -1.14124 | Female-biased |
| MR0G023365.1 | CSD     | -0.4685  | -1.05741 |               |
| MR7G010688.2 | CSD     | -0.8202  | -1.03882 |               |
| MR2G021709.1 | E2F-DP  | -1.54117 | -1.01852 | Female-biased |
| MR8G027687.2 | E2F-DP  | 1.126094 | 0.284927 |               |
| MR1G018593.1 | EIL     | -1.14857 | -1.10458 | Female-biased |
| MR8G004987.1 | EIL     | -0.3139  | 2.052851 |               |
| MR7G000999.2 | FAR1    | -3.36617 | -2.20343 | Female-biased |
| MR8G002126.2 | FAR1    | -1.49519 | -1.3579  | Female-biased |
| MR6G019872.2 | FAR1    | -0.77964 | -1.07737 |               |
| MR1G018598.1 | FAR1    | -0.54842 | -1.0725  |               |
| MR5G017147.1 | FAR1    | -0.40329 | -1.04187 |               |
| MR6G010304.1 | FAR1    | -0.21825 | 1.528206 |               |
| MR1G023372.1 | FAR1    | 1.759519 | 1.858298 | Male-biased   |
| MR6G010302.1 | FAR1    | 1.816574 | -0.26978 |               |
| MR8G005830.2 | FHA     | -4.07811 | -3.95207 | Female-biased |
| MR0G008594.3 | FHA     | -2.60268 | -3.402   | Female-biased |
| MR8G002044.2 | FHA     | 1.247741 | 1.906657 | Male-biased   |
| MR5G003275.1 | FHA     | -1.88277 | -0.73296 |               |
| MR3G015153.1 | FHA     | -1.19393 | -0.98928 |               |
| MR5G010378.3 | FHA     | -1.11601 | -0.89543 |               |
| MR6G018105.1 | FHA     | 1.34144  | 0.495006 |               |
| MR4G026977.1 | G2-like | -1.70795 | -2.22892 | Female-biased |
| MR6G021459.1 | G2-like | -0.29305 | -1.76242 |               |
| MR1G006382.1 | G2-like | -1.46215 | -1.54047 | Female-biased |
| MR5G016215.1 | G2-like | -0.56207 | -1.32259 |               |
| MR3G026136.1 | G2-like | -0.24101 | -1.23208 |               |
| MR5G022401.1 | G2-like | -0.28262 | -1.18032 |               |
| MR5G016214.1 | G2-like | 1.580672 | 1.098846 | Male-biased   |
| MR6G021390.2 | G2-like | 6.604213 | 8.738729 | Male-biased   |
| MR1G029229.1 | G2-like | -1.41441 | -0.26218 |               |

|                     |         |          |          |               |
|---------------------|---------|----------|----------|---------------|
| MR1G022975.2        | G2-like | 1.165309 | 0.611891 |               |
| MR4G014241.1        | G2-like | 2.55105  | -11.1033 |               |
| MR6G021504.1        | GeBP    | -1.31507 | -1.36985 | Female-biased |
| MR6G010752.1        | GRAS    | -2.22396 | -2.73894 | Female-biased |
| MR5G017608.1        | GRAS    | -1.81065 | -1.77192 | Female-biased |
| MR0G027758.1        | GRAS    | -0.91852 | -1.52675 |               |
| MR0G027776.1        | GRAS    | -0.91852 | -1.52675 |               |
| MR2G023232.1        | GRAS    | -1.93178 | -1.50894 | Female-biased |
| MR8G007080.2        | GRAS    | -1.27184 | -1.17202 | Female-biased |
| MR7G028053.1        | GRAS    | -0.00617 | -1.16634 |               |
| MR4G021295.1        | GRAS    | -0.27981 | -1.06905 |               |
| MR4G018381.1        | GRAS    | -1.43633 | 0.878844 |               |
| MR7G027609.1        | GRAS    | -1.35167 | -0.45257 |               |
| MR2G024216.1        | GRAS    | 1.055204 | -0.23884 |               |
| MR1G005476.1        | GRAS    | 1.197386 | -1.11247 |               |
| MR6G010478.1        | GRAS    | 1.29238  | 0.553858 |               |
| MR6G021506.1        | GRAS    | 1.515037 | 1.123464 | Male-biased   |
| MR7G021983.1        | GRF     | -0.95824 | -1.81704 |               |
| MR4G021188.1        | GRF     | -2.49099 | -1.76062 | Female-biased |
| MR2G005670.1        | GRF     | -0.16217 | -1.7502  |               |
| MR6G018847.1        | GRF     | -0.75895 | -1.46888 |               |
| MR8G004272.1        | HB      | -1.1612  | -1.32566 | Female-biased |
| MR8G012738.1        | HB      | -1.29316 | -1.25553 | Female-biased |
| MR7G024235.1        | HB      | 1.638543 | -0.71307 |               |
| MR6TCONS_00015131.1 | HRT     |          | -7.89553 |               |
| MR1G027453.1        | HSF     | -0.18982 | -2.18553 |               |
| MR0G006901.1        | HSF     | -2.60802 | -2.13523 | Female-biased |
| MR6G016551.1        | HSF     | -1.30693 | -1.87181 | Female-biased |
| MR0G005153.1        | HSF     | 1.11624  | 2.756218 | Male-biased   |
| MR3G009468.1        | HSF     | -0.078   | 3.180277 |               |
| MR7G027933.1        | HSF     | -1.52891 |          |               |
| MR8G019532.1        | LIM     |          | -5.84666 |               |
| MR8G019487.1        | LIM     | -2.53035 | -3.07264 | Female-biased |
| MR1G017663.1        | LIM     | -1.36431 | -2.13001 | Female-biased |
| MR6G015557.1        | LOB     | -1.41076 | -4.34938 | Female-biased |
| MR2G016185.1        | LOB     | -3.14501 | -2.99114 | Female-biased |
| MR6G026951.1        | LOB     | 1.688554 | -2.19091 |               |
| MR1G023921.1        | LOB     | -0.12673 | -1.04671 |               |
| MR2G028940.1        | LOB     | 2.229122 | 2.108295 | Male-biased   |
| MR2G011937.1        | LOB     | 0.410933 | 2.569527 |               |
| MR7G001353.1        | LOB     | -1.16667 | 2.925592 |               |
| MR8G007624.1        | MADS    | -2.09504 | -2.23055 | Female-biased |
| MR6G019836.1        | MADS    | 0.07371  | -1.61132 |               |
| MR0G004520.1        | MADS    | -1.12733 | -1.40343 | Female-biased |
| MR7G008266.1        | MADS    | -0.65643 | -1.22568 |               |
| MR1G028353.2        | MADS    | 0.956644 | 1.286294 |               |
| MR2G024877.1        | MADS    | -1.03562 | 2.693258 |               |
| MR2G028804.3        | MADS    | 4.498093 | 3.687309 | Male-biased   |
| MR0G005926.1        | MADS    | 10.99077 | 11.55486 | Male-biased   |
| MR7G013040.1        | MADS    | -1.05235 | -0.37322 |               |

|                     |       |          |          |               |
|---------------------|-------|----------|----------|---------------|
| MR8G019281.1        | MADS  | 1.537994 | 1.178597 | Male-biased   |
| MR6G009344.1        | mTERF | -9.08681 | -8.90392 | Female-biased |
| MR7G021960.1        | mTERF | -1.11935 | -1.51166 | Female-biased |
| MR4G015437.1        | mTERF | -0.80804 | -1.44181 |               |
| MR8G006280.1        | mTERF | -0.74854 | -1.16045 |               |
| MR1G005382.1        | mTERF | 0.264536 | -1.12492 |               |
| MR2G002677.1        | mTERF | -0.65585 | -1.10964 |               |
| MR8G023496.1        | mTERF | -0.4138  | 1.051961 |               |
| MR5TCONS_00011163.1 | mTERF | -1.48875 | -3.76457 | Female-biased |
| MR4G006409.1        | mTERF | 1.133605 | 0.484122 |               |
| MR6G025618.1        | mTERF | 2.224694 | 0.893085 |               |
| MR4G023331.1        | MYB   | -6.12077 | -8.51967 | Female-biased |
| MR4G009025.1        | MYB   | -7.05628 | -8.20118 | Female-biased |
| MR3G001271.1        | MYB   | -2.09488 | -5.9862  | Female-biased |
| MR2G012875.1        | MYB   | -4.00775 | -4.70921 | Female-biased |
| MR1G002331.1        | MYB   | -6.11414 | -3.40067 | Female-biased |
| MR5G002495.2        | MYB   | -1.06134 | -2.95374 | Female-biased |
| MR2G023221.1        | MYB   | -2.53232 | -2.93501 | Female-biased |
| MR2G005739.1        | MYB   | 0.100929 | -2.83422 |               |
| MR2G000645.1        | MYB   | -3.13503 | -2.5825  | Female-biased |
| MR2G000192.1        | MYB   | -1.56439 | -2.04467 | Female-biased |
| MR1G029309.1        | MYB   | 0.14691  | -1.843   |               |
| MR2G016448.1        | MYB   | -0.70452 | -1.82621 |               |
| MR6G018838.1        | MYB   | 0.12705  | -1.68035 |               |
| MR2G000910.2        | MYB   | -1.12385 | -1.64385 | Female-biased |
| MR0G011028.3        | MYB   | -1.83136 | -1.6229  | Female-biased |
| MR5G025086.1        | MYB   | -0.94429 | -1.6092  |               |
| MR6G021516.3        | MYB   | 0.128226 | -1.60812 |               |
| MR6G018839.1        | MYB   | -0.17587 | -1.49344 |               |
| MR6TCONS_00015422.1 | MYB   | 0.703873 | -1.44692 |               |
| MR3G014811.1        | MYB   | -0.51523 | -1.41933 |               |
| MR1G027074.1        | MYB   | -0.49442 | -1.40329 |               |
| MR5G025027.1        | MYB   | -0.89639 | -1.3256  |               |
| MR3G026244.1        | MYB   | 0.626353 | -1.32466 |               |
| MR0G003835.1        | MYB   | -0.67035 | -1.32404 |               |
| MR5G003799.1        | MYB   | -0.40979 | -1.24668 |               |
| MR6TCONS_00014817.1 | MYB   | 0.119181 | -1.24575 |               |
| MR7G007545.1        | MYB   | -0.05968 | -1.24528 |               |
| MR6G027697.1        | MYB   | -0.6581  | -1.18333 |               |
| MR1G005480.1        | MYB   | -0.98118 | -1.16236 |               |
| MR6G016540.1        | MYB   | -0.2122  | -1.14325 |               |
| MR1TCONS_00013823.1 | MYB   | -0.92228 | -1.10045 |               |
| MR2G027101.3        | MYB   | -0.99332 | -1.07362 |               |
| MR3G011069.1        | MYB   | 0.045973 | -1.03963 |               |
| MR3G011076.1        | MYB   | 0.045973 | -1.03963 |               |
| MR2G024869.2        | MYB   | -0.43304 | -1.00646 |               |
| MR7G000808.1        | MYB   | -1.11446 | -1.00202 | Female-biased |
| MR7G013056.1        | MYB   | -0.45705 | 1.022744 |               |
| MR5G025085.1        | MYB   | -0.68849 | 1.08952  |               |
| MR2G006874.1        | MYB   | -0.89511 | 1.115388 |               |

|                     |            |          |          |               |
|---------------------|------------|----------|----------|---------------|
| MR8G007383.1        | MYB        | 1.203707 | 1.124883 | Male-biased   |
| MR3TCONS_00039020.1 | MYB        | -0.17365 | 1.170437 |               |
| MR7TCONS_00051920.1 | MYB        | -0.19193 | 1.197105 |               |
| MR8TCONS_00067993.1 | MYB        | -0.38162 | 1.255227 |               |
| MR3G014734.2        | MYB        | 1.283921 | 2.500156 | Male-biased   |
| MR6G004331.1        | MYB        | 1.955658 | 2.773777 | Male-biased   |
| MR0G006573.1        | MYB        | 1.172715 | 3.113033 | Male-biased   |
| MR1TCONS_00020658.1 | MYB        | 8.830645 | 6.819302 | Male-biased   |
| MR3G001142.1        | MYB        | -2.30394 | -0.97857 |               |
| MR1G014064.1        | MYB        | -1.86021 | -0.40091 |               |
| MR5G021935.1        | MYB        | -1.42563 | -0.10385 |               |
| MR1G019297.1        | MYB        | -1.3299  | -0.16994 |               |
| MR4G021334.1        | MYB        | -1.13664 | -0.6627  |               |
| MR7TCONS_00061960.1 | MYB        | -1.06554 | -0.37751 |               |
| MR8TCONS_00002049.1 | MYB        | -1.04001 | -0.42747 |               |
| MR7G022705.1        | MYB        | -1.01856 | 0.009964 |               |
| MR6G021487.1        | MYB        | 1.134898 | -0.49812 |               |
| MR0G007890.1        | MYB        | 1.163236 | 1.905003 | Male-biased   |
| MR1G020571.1        | MYB        | 3.246224 | 0.030861 |               |
| MR7G001983.1        | NAC        | -8.36097 | -6.46387 | Female-biased |
| MR8G028131.1        | NAC        | -7.17086 | -5.35971 | Female-biased |
| MR4G003861.1        | NAC        | -2.82577 | -3.35836 | Female-biased |
| MR4G021267.1        | NAC        | -1.95145 | -1.81652 | Female-biased |
| MR3G017020.2        | NAC        | -1.1783  | -1.06115 | Female-biased |
| MR0G006218.1        | NAC        | -1.01683 | 1.018694 |               |
| MR7G013515.1        | NAC        | 1.091916 | 1.078244 | Male-biased   |
| MR8G024965.1        | NAC        | -1.5734  | 1.388872 |               |
| MR7TCONS_00049269.1 | NAC        | -0.75795 | 1.638381 |               |
| MR4G021102.1        | NAC        | 0.144171 | 1.906867 |               |
| MR2G027638.1        | NAC        | 0.497503 | 2.004013 |               |
| MR2G027639.1        | NAC        | 9.813781 | 3.868021 | Male-biased   |
| MR6G010794.1        | NAC        | 9.68301  | 8.789061 | Male-biased   |
| MR7TCONS_00049466.1 | NAC        | 11.08518 | 10.27494 | Male-biased   |
| MR3G015792.1        | NAC        | -1.88176 | -0.80953 |               |
| MR7G013031.1        | NAC        | -1.88106 | -0.5313  |               |
| MR7G008137.1        | NAC        | 1.374302 | -0.58227 |               |
| MR0G007465.1        | NFYA       | -3.22629 | -3.80126 | Female-biased |
| MR1G027429.1        | NFYA       | 3.700775 | 4.31231  | Male-biased   |
| MR6TCONS_00015260.1 | NFYA       | 1.110074 | 0.37722  |               |
| MR2TCONS_00053201.1 | NFYA       | 1.133382 | 0.784611 |               |
| MR1G004770.1        | NFYA       | 1.374178 | 0.724366 |               |
| MR4G016280.1        | NF-YB      | -1.00803 | -0.21838 |               |
| MR1G019312.1        | OFP        | 0.33098  | -1.4505  |               |
| MR2G027683.1        | OFP        | -1.46566 | 1.40114  |               |
| MR6TCONS_00056704.1 | PBF-2-like | -0.89295 | -1.75383 |               |
| MR7G000798.1        | PBF-2-like | -0.6833  | -1.13872 |               |
| MR0G008511.1        | PLATZ      | -0.57647 | -1.20397 |               |
| MR4G023632.1        | PLATZ      | -0.10523 | 2.126219 |               |
| MR8G029140.1        | RWP-RK     | -5.15885 | -4.12747 | Female-biased |
| MR3G001101.1        | RWP-RK     | -3.22596 | -2.59418 | Female-biased |

|                     |              |          |          |               |
|---------------------|--------------|----------|----------|---------------|
| MR0G004808.1        | RWP-RK       | 0.169316 | -1.4768  |               |
| MR8G015360.1        | RWP-RK       | -0.88394 | -1.06601 |               |
| MR2G006999.1        | SBP          | -1.62787 | -1.50019 | Female-biased |
| MR5G021895.2        | SBP          | -1.59857 | -1.00064 | Female-biased |
| MR8G007406.1        | SBP          | 1.195964 | 1.074178 | Male-biased   |
| MR1G013974.1        | Sigma70-like | -0.74538 | -1.72627 |               |
| MR8G014224.1        | Sigma70-like | -0.34423 | -1.28674 |               |
| MR7G015183.3        | Sigma70-like | -1.84619 | 0.065646 |               |
| MR5G003816.1        | SWI/SNF      | -1.71197 | 0.834414 |               |
| MR5G024537.1        | TAZ          | -4.765   | -5.9094  | Female-biased |
| MR4G021037.1        | TAZ          | -1.55079 | -0.44955 |               |
| MR6TCONS_00004269.1 | TCP          | 1.567073 | -1.85264 |               |
| MR2G000403.1        | TCP          | -0.63615 | -1.22299 |               |
| MR7G011414.1        | TCP          | -0.30586 | -1.15976 |               |
| MR0G005919.1        | TCP          | -1.4997  | -1.15836 | Female-biased |
| MR0G005918.1        | TCP          | -1.0991  | -0.93656 |               |
| MR8G021808.1        | Tify         | -9.1291  | -10.7563 | Female-biased |
| MR7G012609.1        | Tify         | -8.58303 | -8.27472 | Female-biased |
| MR7G002983.1        | Tify         | -9.23098 | -6.90502 | Female-biased |
| MR3G014475.1        | Tify         | -8.10048 | -6.43062 | Female-biased |
| MR5G024985.1        | Tify         | -1.2017  | -1.20678 | Female-biased |
| MR7G002984.2        | Tify         | -2.49034 | -1.20189 | Female-biased |
| MR6G022827.1        | Tify         | 0.973033 | 2.736979 |               |
| MR3G014474.2        | Tify         | 3.238931 | 3.597219 | Male-biased   |
| MR6G022829.1        | Tify         | -2.24165 | 7.609239 |               |
| MR6G013367.1        | TIG          | 1.865275 | 1.894734 | Male-biased   |
| MR5G021904.1        | TIG          | 2.837571 | 2.861517 | Male-biased   |
| MR3G023980.1        | Trihelix     | -10.3626 | -10.7322 | Female-biased |
| MR7G000174.1        | Trihelix     | -0.25756 | -1.62714 |               |
| MR4G001657.1        | Trihelix     | -1.10361 | -1.61853 | Female-biased |
| MR6G010891.1        | Trihelix     | -1.32913 | -1.30636 | Female-biased |
| MR2G020369.1        | Trihelix     | -0.43995 | -1.20656 |               |
| MR1G015648.1        | Trihelix     | -0.25627 | -1.17452 |               |
| MR1TCONS_00011999.1 | Trihelix     | 0.239268 | -1.1087  |               |
| MR1TCONS_00012000.1 | Trihelix     | 0.239268 | -1.1087  |               |
| MR2G006754.1        | Trihelix     | -2.07404 | -1.05041 | Female-biased |
| MR5G021897.1        | Trihelix     | -0.84705 | -1.02881 |               |
| MR5G025093.1        | Trihelix     | -2.29559 | -0.90108 |               |
| MR7G005491.2        | Trihelix     | -1.64212 | -0.80735 |               |
| MR2G002673.2        | Trihelix     | 1.680352 | 0.294116 |               |
| MR4G018573.1        | TUB          | -8.57684 | -11.363  | Female-biased |
| MR3G023986.1        | TUB          | -2.68255 | -3.61068 | Female-biased |
| MR5G002508.1        | TUB          | 5.845237 | 4.878932 | Male-biased   |
| MR6G008503.1        | ULT          | -1.12093 | -1.00349 | Female-biased |
| MR2G018504.1        | VOZ          | -1.10918 | -1.19351 | Female-biased |
| MR8G004639.1        | WRKY         | -10.8075 | -12.994  | Female-biased |
| MR5G017510.1        | WRKY         | -12.2154 | -11.904  | Female-biased |
| MR6G022939.1        | WRKY         | -11.5413 | -9.05376 | Female-biased |
| MR8G028163.1        | WRKY         | -10.7269 | -9.01122 | Female-biased |
| MR3G026679.1        | WRKY         | -9.09225 | -8.42398 | Female-biased |

|                     |       |          |          |             |
|---------------------|-------|----------|----------|-------------|
| MR0TCONS_00009688.1 | WRKY  | -0.6629  | -1.06625 |             |
| MR7G015184.1        | WRKY  | -1.41053 | 1.309454 |             |
| MR2G016396.1        | WRKY  | -0.93533 | 1.775696 |             |
| MR3G012299.1        | WRKY  | 0.928839 | 2.45221  |             |
| MR2G016401.1        | WRKY  | 0.721859 | 3.097345 |             |
| MR4G025295.1        | WRKY  | 6.417628 | 6.963842 | Male-biased |
| MR6G011302.1        | WRKY  | 9.014792 | 7.439172 | Male-biased |
| MR8G012766.1        | WRKY  | -1.84204 | -0.93253 |             |
| MR4G022367.1        | WRKY  | -1.6215  | 0.529258 |             |
| MR3G019067.1        | WRKY  | -1.32689 | -0.54868 |             |
| MR2G028587.1        | WRKY  | -1.19888 | 0.547514 |             |
| MR3G011147.1        | WRKY  | -1.08094 | 0.353637 |             |
| MR1G008927.1        | WRKY  | -1.0493  | -0.10859 |             |
| MR6G022509.1        | WRKY  | 1.241645 | 0.269575 |             |
| MR7G000837.1        | zf-HD | 1.19878  | -1.30913 |             |
| MR7G023875.1        | zf-HD | 1.19878  | -1.30913 |             |
| MR6G013935.1        | zf-HD | 6.105447 | 5.347811 | Male-biased |

---

**Table S11.** List of transcription factor genes specifically expressed in males and females.

| Gene ID             | F0       | F1       | M0       | M1       | Family       | Specific<br>expressed | log2(M0/F0) | log2(M1/F1) |
|---------------------|----------|----------|----------|----------|--------------|-----------------------|-------------|-------------|
| MR7G011421.1        | 0        | 0        | 1.826667 | 4.44     | ABI3VP1      | male                  | 6.784478    | 6.631908    |
| MR5G011875.1        | 0        | 0        | 3.243333 | 1.976667 | bHLH         | male                  | 4.04855     | 7.583524    |
| MR6G001563.1        | 0        | 0        | 7.35     | 5.33     | bHLH         | male                  | 8.662568    | 8.17448     |
| MR8G020751.1        | 0        | 0        | 7.35     | 5.33     | bHLH         | male                  | 8.662568    | 8.17448     |
| MR1G007787.1        | 0        | 0        | 16.40667 | 15.97667 | bZIP         | male                  | 4.77322     | 4.647635    |
| MR8G027384.1        | 0        | 0        | 50.39333 | 48.64333 | C2C2-CO-like | male                  | 11.98149    | 11.90509    |
| MR3G018666.1        | 0        | 0        | 1.556667 | 4.78     | C2C2-GATA    | male                  | 6.93141     | 8.539027    |
| MR0G018656.1        | 0        | 0        | 1.556667 | 4.78     | C2C2-GATA    | male                  | 6.93141     | 8.539027    |
| MR7G007143.1        | 0        | 0        | 19.22667 | 36.12333 | C2C2-GATA    | male                  | 10.5785     | 11.4618     |
| MR6G021390.2        | 0        | 0        | 14.35667 | 16.01667 | G2-like      | male                  | 6.604213    | 8.738729    |
| MR0G005926.1        | 0        | 0        | 44.56667 | 67.31333 | MADS         | male                  | 10.99077    | 11.55486    |
| MR1TCONS_00020658.1 | 0        | 0        | 13.44    | 16.56    | MYB          | male                  | 8.830645    | 6.819302    |
| MR6G010794.1        | 0        | 0        | 12.09    | 23.83667 | NAC          | male                  | 9.68301     | 8.789061    |
| MR7TCONS_00049466.1 | 0        | 0        | 39.35667 | 22.87    | NAC          | male                  | 11.08518    | 10.27494    |
| MR1G027429.1        | 0        | 0        | 9.006667 | 12.10333 | NFYA         | male                  | 3.700775    | 4.31231     |
| MR4G025295.1        | 0        | 0        | 1.26     | 1.84     | WRKY         | male                  | 6.417628    | 6.963842    |
| MR6G011302.1        | 0        | 0        | 6.446667 | 2.203333 | WRKY         | male                  | 9.014792    | 7.439172    |
| MR6G013935.1        | 0        | 0        | 37.31667 | 22.05333 | zf-HD        | male                  | 6.105447    | 5.347811    |
| MR6G025263.1        | 10.09333 | 12.02667 | 0        | 0        | Alfin-like   | female                | -5.26195    | -10.1966    |
| MR8G022041.1        | 26.71    | 11.24667 | 0        | 0        | AP2-EREBP    | female                | -7.99849    | -9.65651    |
| MR2G007010.1        | 357.13   | 259.87   | 0        | 0        | AP2-EREBP    | female                | -14.2213    | -9.4565     |
| MR0G006452.1        | 4.96     | 5.456667 | 0        | 0        | AP2-EREBP    | female                | -8.50078    | -8.64802    |
| MR1G017646.1        | 11.86333 | 12.35667 | 0        | 0        | AP2-EREBP    | female                | -5.7735     | -4.40464    |
| MR3G011095.1        | 73.04667 | 55.63    | 0        | 0        | ARF          | female                | -7.23927    | -13.6966    |
| MR4G010547.2        | 35.00667 | 52.79333 | 0        | 0        | ARF          | female                | -8.70508    | -9.5325     |
| MR7G007520.1        | 22.86    | 33.53    | 0        | 0        | ARF          | female                | -7.31323    | -7.96211    |
| MR4G010937.1        | 17.37    | 25.75667 | 0        | 0        | ARR-B        | female                | -7.8639     | -10.8964    |
| MR1G020885.1        | 35.25    | 35.35    | 0        | 0        | bHLH         | female                | -7.51928    | -10.4511    |

|                     |          |          |   |   |              |        |          |          |
|---------------------|----------|----------|---|---|--------------|--------|----------|----------|
| MR6G026964.1        | 7.60     | 5.71     | 0 | 0 | bHLH         | female | -4.53719 | -4.79464 |
| MR7G020473.2        | 9.12     | 6.52     | 0 | 0 | bHLH         | female | -4.28014 | -3.86179 |
| MR2G024394.1        | 9.05     | 7.84     | 0 | 0 | bHLH         | female | -3.27877 | -3.15063 |
| MR4G009030.1        | 2.57     | 1.96     | 0 | 0 | bHLH         | female | -2.52658 | -3.07265 |
| MR8TCONS_00067952.1 | 4.46     | 3.53     | 0 | 0 | bHLH         | female | -3.04209 | -2.83773 |
| MR6G018079.1        | 9.806667 | 12.41667 | 0 | 0 | C2C2-CO-like | female | -8.17679 | -10.1009 |
| MR3G018958.1        | 25.43667 | 4.613333 | 0 | 0 | C2C2-CO-like | female | -11.4287 | -8.96822 |
| MR5G011870.1        | 39.05333 | 41.75    | 0 | 0 | C2C2-Dof     | female | -6.81564 | -7.94453 |
| MR3G009872.2        | 59.30333 | 59.01333 | 0 | 0 | C2C2-Dof     | female | -7.1337  | -6.12078 |
| MR6G010822.1        | 14.17333 | 11.12    | 0 | 0 | C2C2-GATA    | female | -8.81252 | -8.47872 |
| MR2G002020.1        | 35.21667 | 44.52667 | 0 | 0 | C2H2         | female | -5.1245  | -5.5756  |
| MR7G011412.1        | 20.77333 | 14.48667 | 0 | 0 | C2H2         | female | -5.21421 | -4.11575 |
| MR2G025885.1        | 2.763333 | 3.243333 | 0 | 0 | C3H          | female | -8.1073  | -8.34203 |
| MR6G019909.1        | 2.763333 | 3.243333 | 0 | 0 | C3H          | female | -8.1073  | -8.34203 |
| MR5G003404.2        | 9.55     | 9.326667 | 0 | 0 | C3H          | female | -5.173   | -4.30782 |
| MR6G009344.1        | 4.253333 | 3.743333 | 0 | 0 | mTERF        | female | -9.08681 | -8.90392 |
| MR4G023331.1        | 3.88     | 4.16     | 0 | 0 | MYB          | female | -6.12077 | -8.51967 |
| MR4G009025.1        | 1.35     | 2.42     | 0 | 0 | MYB          | female | -7.05628 | -8.20118 |
| MR7G001983.1        | 5.24     | 1.363333 | 0 | 0 | NAC          | female | -8.36097 | -6.46387 |
| MR8G028131.1        | 4.323333 | 3.006667 | 0 | 0 | NAC          | female | -7.17086 | -5.35971 |
| MR5G024537.1        | 11.91667 | 12.81667 | 0 | 0 | TAZ          | female | -4.765   | -5.9094  |
| MR8G021808.1        | 16.66    | 15.97667 | 0 | 0 | Tify         | female | -9.1291  | -10.7563 |
| MR3G014475.1        | 11.34    | 88.97    | 0 | 0 | Tify         | female | -8.10048 | -6.43062 |
| MR3G023980.1        | 11.90667 | 15.34333 | 0 | 0 | Trihelix     | female | -10.3626 | -10.7322 |
| MR8G004639.1        | 127.9633 | 109.3567 | 0 | 0 | WRKY         | female | -10.8075 | -12.994  |
| MR5G017510.1        | 61.07333 | 49.08333 | 0 | 0 | WRKY         | female | -12.2154 | -11.904  |
| MR6G022939.1        | 18.55    | 15.46667 | 0 | 0 | WRKY         | female | -11.5413 | -9.05376 |
| MR8G028163.1        | 65.93333 | 68.51667 | 0 | 0 | WRKY         | female | -10.7269 | -9.01122 |
| MR3G026679.1        | 121.7    | 140.6733 | 0 | 0 | WRKY         | female | -9.09225 | -8.42398 |

[illegible]

[illegible]

[illegible]

[illegible]

[illegible]

[illegible]

**Table S13.** List of genes in the light-green and dark-cyan networks.

| MElightgreen network edges |                     |          | MEdarkcyan network edges |                     |          |
|----------------------------|---------------------|----------|--------------------------|---------------------|----------|
| Source                     | Target              | Weight   | Source                   | Target              | Weight   |
| MR0TCONS_00017483.1        | MR6G019729.1        | 0.472695 | MR1G019545.1             | MR4G006774.1        | 0.530353 |
| MR0TCONS_00017483.1        | MR7G000813.2        | 0.467842 | MR1G019545.1             | MR7G011363.5        | 0.530615 |
| MR0TCONS_00017483.1        | MR5G009737.1        | 0.462667 | MR1G019545.1             | MR8G000678.2        | 0.533582 |
| MR0TCONS_00017483.1        | MR2G024219.1        | 0.478073 | MR1G019545.1             | MR7G014360.1        | 0.521973 |
| MR0TCONS_00017483.1        | MR6G018085.1        | 0.462152 | MR1G019545.1             | MR4G026972.1        | 0.535006 |
| MR0TCONS_00017483.1        | MR6G018093.1        | 0.490058 | MR1G019545.1             | MR8G012690.1        | 0.531392 |
| MR0TCONS_00017483.1        | MR2G024440.1        | 0.48157  | MR1G019545.1             | MR7G014376.1        | 0.535668 |
| MR0TCONS_00017483.1        | MR2G024131.1        | 0.474114 | MR1G019545.1             | MR8G000662.1        | 0.529448 |
| MR0TCONS_00017483.1        | MR5G011953.1        | 0.487234 | MR1G019545.1             | MR8G016813.1        | 0.523919 |
| MR0TCONS_00017483.1        | MR0TCONS_00026066.1 | 0.449195 | MR1G019545.1             | MR4G026702.1        | 0.52099  |
| MR0TCONS_00017483.1        | MR5G003464.1        | 0.474372 | MR1G019545.1             | MR4G009043.1        | 0.537901 |
| MR0TCONS_00017483.1        | MR6G018097.1        | 0.486165 | MR1G019545.1             | MR7TCONS_00020974.1 | 0.535619 |
| MR0TCONS_00017483.1        | MR6G025626.1        | 0.466192 | MR1G019545.1             | MR6G005848.1        | 0.527777 |
| MR0TCONS_00017483.1        | MR2G020373.1        | 0.444728 | MR1G019545.1             | MR4G014243.1        | 0.533526 |
| MR0TCONS_00017483.1        | MR2G022287.1        | 0.488992 | MR1G019545.1             | MR4G015995.1        | 0.536947 |
| MR0TCONS_00017483.1        | MR6G018074.1        | 0.48746  | MR1G019545.1             | MR4G008724.1        | 0.527548 |
| MR0TCONS_00017483.1        | MR5G011870.1        | 0.484514 | MR1G019545.1             | MR8G001590.1        | 0.523659 |
| MR0TCONS_00017483.1        | MR0TCONS_00023638.1 | 0.4729   | MR1G019545.1             | MR8G001596.1        | 0.527655 |
| MR0TCONS_00017483.1        | MR7G000148.1        | 0.466159 | MR1G019545.1             | MR4G016027.1        | 0.528404 |
| MR0TCONS_00017483.1        | MR0TCONS_00029296.1 | 0.474483 | MR1G019545.1             | MR5TCONS_00034061.1 | 0.531977 |
| MR0TCONS_00017483.1        | MR2TCONS_00005123.1 | 0.471948 | MR1G019545.1             | MR7G011670.2        | 0.524342 |
| MR0TCONS_00017483.1        | MR3G001179.1        | 0.490514 | MR1G019545.1             | MR4G023618.1        | 0.537393 |
| MR0TCONS_00017483.1        | MR3G001245.1        | 0.440777 | MR1G019545.1             | MR8G011203.1        | 0.527833 |
| MR0TCONS_00017483.1        | MR6G020073.2        | 0.487276 | MR1G019545.1             | MR7G007479.1        | 0.524569 |
| MR0TCONS_00017483.1        | MR5G003617.1        | 0.462246 | MR1G019545.1             | MR7G007524.1        | 0.533887 |
| MR0TCONS_00017483.1        | MR6G021647.1        | 0.465426 | MR1G019545.1             | MR0G025665.1        | 0.522876 |
| MR0TCONS_00017483.1        | MR5G009648.1        | 0.488198 | MR1G019545.1             | MR8G020746.1        | 0.525507 |
| MR0TCONS_00017483.1        | MR5G009689.1        | 0.489969 | MR1G019545.1             | MR8G020754.1        | 0.532128 |
| MR0TCONS_00017483.1        | MR1G014018.1        | 0.461549 | MR1G019545.1             | MR4G009044.1        | 0.535816 |
| MR0TCONS_00017483.1        | MR0TCONS_00018991.1 | 0.465868 | MR1G019545.1             | MR6G004352.1        | 0.523767 |
| MR0TCONS_00017483.1        | MR6TCONS_00003668.1 | 0.489351 | MR1G019545.1             | MR8G003125.1        | 0.529818 |
| MR0TCONS_00017483.1        | MR5G025810.1        | 0.444786 | MR1G019545.1             | MR8G003345.1        | 0.531511 |
| MR0TCONS_00017483.1        | MR5G012384.1        | 0.484915 | MR1G019545.1             | MR8G004551.1        | 0.526003 |
| MR0TCONS_00017483.1        | MR0TCONS_00035048.1 | 0.491539 | MR1G019545.1             | MR8G001577.1        | 0.536081 |
| MR0TCONS_00017483.1        | MR0TCONS_00037396.1 | 0.486234 | MR1G019545.1             | MR6G003889.1        | 0.520869 |
| MR0TCONS_00017483.1        | MR6G019866.1        | 0.481042 | MR1G019545.1             | MR7G016713.1        | 0.522065 |
| MR0TCONS_00017483.1        | MR6G019911.1        | 0.488566 | MR1G019545.1             | MR8G010076.1        | 0.531217 |
| MR0TCONS_00017483.1        | MR6G021435.1        | 0.494329 | MR1G019545.1             | MR2G000623.1        | 0.528358 |
| MR0TCONS_00017483.1        | MR3G002725.1        | 0.488576 | MR1G019545.1             | MR2G006160.1        | 0.524486 |
| MR0TCONS_00017483.1        | MR3G006431.1        | 0.467835 | MR1G019545.1             | MR2G009995.1        | 0.533892 |
| MR0TCONS_00017483.1        | MR6G016528.1        | 0.465699 | MR1G019545.1             | MR2G011703.1        | 0.521744 |
| MR0TCONS_00017483.1        | MR8G012637.1        | 0.453043 | MR1G019545.1             | MR2G011723.1        | 0.521744 |
| MR0TCONS_00017483.1        | MR6G025929.3        | 0.475683 | MR1G019545.1             | MR8G019130.1        | 0.522096 |
| MR0TCONS_00017483.1        | MR5G025036.1        | 0.47007  | MR1G019545.1             | MR8G019531.1        | 0.532421 |

|                     |                     |          |              |              |          |
|---------------------|---------------------|----------|--------------|--------------|----------|
| MR0TCONS_00017483.1 | MR2G024060.1        | 0.468873 | MR1G019545.1 | MR6G010863.1 | 0.52806  |
| MR0TCONS_00017483.1 | MR2G024087.2        | 0.463476 | MR1G019545.1 | MR6G013295.1 | 0.523673 |
| MR0TCONS_00017483.1 | MR5G015914.1        | 0.461509 | MR1G019545.1 | MR6G013325.1 | 0.533876 |
| MR0TCONS_00017483.1 | MR5G017115.1        | 0.482252 | MR1G019545.1 | MR4G021010.1 | 0.537064 |
| MR0TCONS_00017483.1 | MR5G017134.1        | 0.483385 | MR1G019545.1 | MR4G021019.1 | 0.532904 |
| MR0TCONS_00017483.1 | MR5G017201.1        | 0.45717  | MR1G019545.1 | MR2G005420.4 | 0.529413 |
| MR0TCONS_00017483.1 | MR8G020616.1        | 0.47464  | MR1G019545.1 | MR7G022721.1 | 0.526542 |
| MR0TCONS_00017483.1 | MR5G003222.1        | 0.461414 | MR1G019545.1 | MR2G006162.1 | 0.522268 |
| MR0TCONS_00017483.1 | MR5G003457.1        | 0.461668 | MR1G019545.1 | MR3G021766.1 | 0.521165 |
| MR0TCONS_00017483.1 | MR6G025594.1        | 0.485874 | MR1G019545.1 | MR2G022146.2 | 0.531827 |
| MR0TCONS_00017483.1 | MR1G003952.1        | 0.4635   | MR1G019545.1 | MR8G002765.1 | 0.537251 |
| MR0TCONS_00017483.1 | MR8G012696.1        | 0.472083 | MR1G019545.1 | MR8G002789.1 | 0.524698 |
| MR0TCONS_00017483.1 | MR8G015530.1        | 0.44582  | MR1G019545.1 | MR4G016473.3 | 0.537799 |
| MR0TCONS_00017483.1 | MR1G012147.1        | 0.453971 | MR1G019545.1 | MR4G021008.1 | 0.529365 |
| MR0TCONS_00017483.1 | MR3G014724.1        | 0.478088 | MR1G019545.1 | MR1G028360.1 | 0.530692 |
| MR0TCONS_00017483.1 | MR8G018185.1        | 0.485219 | MR1G019545.1 | MR7G022720.1 | 0.531906 |
| MR0TCONS_00017483.1 | MR8G019278.2        | 0.442798 | MR1G019545.1 | MR5G024989.2 | 0.530019 |
| MR0TCONS_00017483.1 | MR8G019517.1        | 0.443497 | MR1G019545.1 | MR4G023611.1 | 0.531846 |
| MR0TCONS_00017483.1 | MR8G019525.2        | 0.463006 | MR1G019545.1 | MR0G014428.1 | 0.521333 |
| MR0TCONS_00017483.1 | MR5G017299.1        | 0.478958 | MR1G019545.1 | MR8G022070.1 | 0.520206 |
| MR0TCONS_00017483.1 | MR7G007720.1        | 0.483596 | MR1G019545.1 | MR2G024066.1 | 0.526811 |
| MR0TCONS_00017483.1 | MR5G017371.1        | 0.456278 | MR1G019545.1 | MR5G024525.1 | 0.52037  |
| MR0TCONS_00017483.1 | MR1G003946.1        | 0.4635   | MR1G019545.1 | MR4G016475.1 | 0.526399 |
| MR0TCONS_00017483.1 | MR7G016767.2        | 0.479855 | MR1G019545.1 | MR8G006636.1 | 0.526668 |
| MR0TCONS_00017483.1 | MR1G008473.1        | 0.484447 | MR1G019545.1 | MR8G007621.1 | 0.524177 |
| MR0TCONS_00017483.1 | MR1G008913.1        | 0.448723 | MR1G019545.1 | MR5G017247.1 | 0.522975 |
| MR0TCONS_00017483.1 | MR7G024256.1        | 0.47191  | MR1G019545.1 | MR5G018745.1 | 0.527478 |
| MR0TCONS_00017483.1 | MR7G028038.2        | 0.462208 | MR1G019545.1 | MR0G024306.1 | 0.532135 |
| MR0TCONS_00017483.1 | MR7G000150.1        | 0.484082 | MR1G019545.1 | MR8G028462.1 | 0.528279 |
| MR0TCONS_00017483.1 | MR1G019332.1        | 0.483024 | MR1G019545.1 | MR7G024817.1 | 0.528395 |
| MR0TCONS_00017483.1 | MR7G000834.1        | 0.477033 | MR1G019545.1 | MR5G010171.1 | 0.529574 |
| MR0TCONS_00017483.1 | MR7G004995.1        | 0.47243  | MR1G019545.1 | MR8G022192.1 | 0.536927 |
| MR0TCONS_00017483.1 | MR8G020258.1        | 0.489902 | MR1G019545.1 | MR3G011044.1 | 0.528279 |
| MR0TCONS_00017483.1 | MR8G010060.1        | 0.466389 | MR1G019545.1 | MR8G027828.1 | 0.523591 |
| MR0TCONS_00017483.1 | MR2G007010.1        | 0.454479 | MR1G019545.1 | MR6G022644.1 | 0.536699 |
| MR0TCONS_00017483.1 | MR8G010083.1        | 0.483132 | MR1G019545.1 | MR6G025256.1 | 0.534017 |
| MR0TCONS_00017483.1 | MR8G011210.1        | 0.474825 | MR1G019545.1 | MR5G010481.1 | 0.520254 |
| MR0TCONS_00017483.1 | MR6G016522.1        | 0.482652 | MR1G019545.1 | MR2G027161.1 | 0.524456 |
| MR0TCONS_00017483.1 | MR0TCONS_00017544.1 | 0.474151 | MR1G019545.1 | MR0G013397.1 | 0.526775 |
| MR0TCONS_00017483.1 | MR0TCONS_00018067.1 | 0.459493 | MR1G019545.1 | MR0G008817.1 | 0.536209 |
| MR0TCONS_00017483.1 | MR4G026749.1        | 0.453288 | MR1G019545.1 | MR0G005900.1 | 0.527376 |
| MR0TCONS_00017483.1 | MR4G027358.3        | 0.44441  | MR1G019545.1 | MR3G012293.1 | 0.532055 |
| MR0TCONS_00017483.1 | MR8G018182.3        | 0.44333  | MR1G019545.1 | MR6G023576.1 | 0.535173 |
| MR0TCONS_00017483.1 | MR8G018183.1        | 0.485711 | MR1G019545.1 | MR0G005287.1 | 0.532593 |
| MR0TCONS_00017483.1 | MR4TCONS_00016369.1 | 0.452956 | MR1G019545.1 | MR3G014742.1 | 0.529744 |
| MR0TCONS_00017483.1 | MR7G006051.1        | 0.443093 | MR1G019545.1 | MR4G021196.1 | 0.533183 |
| MR0TCONS_00017483.1 | MR0TCONS_00037684.1 | 0.474883 | MR1G019545.1 | MR3G007323.2 | 0.534421 |
| MR0TCONS_00017483.1 | MR0TCONS_00052571.1 | 0.466838 | MR1G019545.1 | MR0G007649.1 | 0.525951 |
| MR0TCONS_00017483.1 | MR1G003944.1        | 0.488007 | MR1G019545.1 | MR0G007648.1 | 0.525951 |
| MR0TCONS_00017483.1 | MR7G008145.3        | 0.444381 | MR1G019545.1 | MR0G007264.1 | 0.538374 |

|                     |                     |          |              |                     |          |
|---------------------|---------------------|----------|--------------|---------------------|----------|
| MR0TCONS_00017483.1 | MR8G020751.1        | 0.445314 | MR1G019545.1 | MR0G002914.1        | 0.522428 |
| MR0TCONS_00017483.1 | MR8G020766.1        | 0.454808 | MR1G019545.1 | MR0G007880.1        | 0.532747 |
| MR0TCONS_00017483.1 | MR3G011063.1        | 0.492797 | MR2G024066.1 | MR2G027161.1        | 0.520497 |
| MR0TCONS_00017483.1 | MR3G014650.1        | 0.466436 | MR2G024066.1 | MR3G007323.2        | 0.525727 |
| MR0TCONS_00017483.1 | MR8G022503.2        | 0.469232 | MR2G024066.1 | MR8G012690.1        | 0.52246  |
| MR0TCONS_00017483.1 | MR1G014145.1        | 0.441061 | MR2G024066.1 | MR8G022192.1        | 0.529221 |
| MR0TCONS_00017483.1 | MR1G015692.1        | 0.463819 | MR2G024066.1 | MR5G018745.1        | 0.523794 |
| MR0TCONS_00017483.1 | MR1G015702.1        | 0.474997 | MR2G024066.1 | MR0G005900.1        | 0.520407 |
| MR0TCONS_00017483.1 | MR4TCONS_00017612.1 | 0.451866 | MR2G024066.1 | MR8G020754.1        | 0.527961 |
| MR0TCONS_00017483.1 | MR1G020884.1        | 0.486851 | MR2G024066.1 | MR0G024306.1        | 0.523726 |
| MR0TCONS_00017483.1 | MR1G022529.1        | 0.483721 | MR2G024066.1 | MR8G019531.1        | 0.525198 |
| MR0TCONS_00017483.1 | MR1G027855.1        | 0.47009  | MR2G024066.1 | MR5G024989.2        | 0.525191 |
| MR0TCONS_00017483.1 | MR6G008503.1        | 0.441617 | MR2G024066.1 | MR0G005287.1        | 0.528321 |
| MR0TCONS_00017483.1 | MR5G020302.1        | 0.475735 | MR2G024066.1 | MR5TCONS_00034061.1 | 0.524546 |
| MR0TCONS_00017483.1 | MR5G020321.1        | 0.484915 | MR2G024066.1 | MR6G004352.1        | 0.520849 |
| MR0TCONS_00017483.1 | MR5G021736.1        | 0.470478 | MR2G024066.1 | MR4G014243.1        | 0.528402 |
| MR0TCONS_00017483.1 | MR5G021745.1        | 0.445437 | MR2G024066.1 | MR4G006774.1        | 0.521642 |
| MR0TCONS_00017483.1 | MR5G024537.1        | 0.476263 | MR2G024066.1 | MR0G008817.1        | 0.530871 |
| MR0TCONS_00017483.1 | MR5G025035.1        | 0.494069 | MR2G024066.1 | MR4G015995.1        | 0.529578 |
| MR0TCONS_00017483.1 | MR6G000259.1        | 0.444918 | MR2G024066.1 | MR6G025256.1        | 0.529309 |
| MR0TCONS_00017483.1 | MR6G000783.1        | 0.480504 | MR2G024066.1 | MR3G012293.1        | 0.523335 |
| MR0TCONS_00017483.1 | MR1G020792.1        | 0.474273 | MR2G024066.1 | MR3G014742.1        | 0.520521 |
| MR0TCONS_00017483.1 | MR8G001629.2        | 0.464934 | MR2G024066.1 | MR6G022644.1        | 0.528839 |
| MR0TCONS_00017483.1 | MR2G006757.1        | 0.444574 | MR2G024066.1 | MR6G023576.1        | 0.527567 |
| MR0TCONS_00017483.1 | MR6G007202.1        | 0.472187 | MR2G024066.1 | MR6G010863.1        | 0.52253  |
| MR0TCONS_00017483.1 | MR0G005280.1        | 0.450192 | MR2G024066.1 | MR4G009043.1        | 0.530856 |
| MR0TCONS_00017483.1 | MR6G010888.2        | 0.474599 | MR2G024066.1 | MR4G009044.1        | 0.527478 |
| MR0TCONS_00017483.1 | MR2G014105.1        | 0.473622 | MR2G024066.1 | MR0G007648.1        | 0.521378 |
| MR0TCONS_00017483.1 | MR2G016358.1        | 0.441022 | MR2G024066.1 | MR0G007880.1        | 0.522761 |
| MR0TCONS_00017483.1 | MR2G020031.1        | 0.474745 | MR2G024066.1 | MR7G014376.1        | 0.53037  |
| MR0TCONS_00017483.1 | MR8G021808.1        | 0.462043 | MR2G024066.1 | MR8G011203.1        | 0.522299 |
| MR0TCONS_00017483.1 | MR1TCONS_00041911.1 | 0.477757 | MR2G024066.1 | MR4G016027.1        | 0.52231  |
| MR0TCONS_00017483.1 | MR4G028396.1        | 0.450406 | MR2G024066.1 | MR4G016473.3        | 0.531383 |
| MR0TCONS_00017483.1 | MR4TCONS_00007092.1 | 0.467096 | MR2G024066.1 | MR7G022720.1        | 0.523979 |
| MR0TCONS_00017483.1 | MR0G001497.1        | 0.463496 | MR2G024066.1 | MR7G022721.1        | 0.521616 |
| MR0TCONS_00017483.1 | MR0G003728.1        | 0.484166 | MR2G024066.1 | MR7G024817.1        | 0.521012 |
| MR0TCONS_00017483.1 | MR5G000697.1        | 0.459128 | MR2G024066.1 | MR7TCONS_00020974.1 | 0.526691 |
| MR0TCONS_00017483.1 | MR5G001859.1        | 0.487491 | MR2G024066.1 | MR8G000662.1        | 0.522348 |
| MR0TCONS_00017483.1 | MR7TCONS_00068913.1 | 0.461654 | MR2G024066.1 | MR6G005848.1        | 0.522243 |
| MR0TCONS_00017483.1 | MR0G005933.1        | 0.494561 | MR2G024066.1 | MR0G007264.1        | 0.531009 |
| MR0TCONS_00017483.1 | MR7G010648.1        | 0.442516 | MR2G024066.1 | MR4G021008.1        | 0.521088 |
| MR0TCONS_00017483.1 | MR7G010680.1        | 0.471934 | MR2G024066.1 | MR8G002765.1        | 0.531468 |
| MR0TCONS_00017483.1 | MR7G012054.1        | 0.453014 | MR2G024066.1 | MR7G011670.2        | 0.520616 |
| MR0TCONS_00017483.1 | MR7G022891.1        | 0.473788 | MR2G024066.1 | MR7G011363.5        | 0.524822 |
| MR0TCONS_00017483.1 | MR1G029232.1        | 0.460258 | MR2G024066.1 | MR5G010171.1        | 0.526775 |
| MR0TCONS_00017483.1 | MR8G027384.1        | 0.482076 | MR2G024066.1 | MR4G021019.1        | 0.523793 |
| MR0TCONS_00017483.1 | MR0G001496.1        | 0.490771 | MR2G024066.1 | MR6G013325.1        | 0.525004 |
| MR0TCONS_00017483.1 | MR1TCONS_00065258.1 | 0.466849 | MR2G024066.1 | MR0G007649.1        | 0.521378 |
| MR0TCONS_00017483.1 | MR6G001563.1        | 0.445314 | MR2G024066.1 | MR8G003345.1        | 0.522888 |
| MR0TCONS_00017483.1 | MR1G017405.1        | 0.449327 | MR2G024066.1 | MR4G016475.1        | 0.521403 |

|                     |                     |          |              |              |          |
|---------------------|---------------------|----------|--------------|--------------|----------|
| MR0TCONS_00017483.1 | MR0G004687.1        | 0.475754 | MR2G024066.1 | MR4G021010.1 | 0.531153 |
| MR0TCONS_00017483.1 | MR3G015834.1        | 0.451201 | MR2G024066.1 | MR4G023618.1 | 0.529901 |
| MR0TCONS_00017483.1 | MR4G021335.1        | 0.475047 | MR2G024066.1 | MR7G007479.1 | 0.520864 |
| MR0TCONS_00017483.1 | MR2G011234.3        | 0.477498 | MR2G024066.1 | MR8G006636.1 | 0.521804 |
| MR0TCONS_00017483.1 | MR4G024734.1        | 0.454284 | MR2G024066.1 | MR8G004551.1 | 0.521361 |
| MR0TCONS_00017483.1 | MR4G025266.1        | 0.443041 | MR2G024066.1 | MR7G007524.1 | 0.526827 |
| MR0TCONS_00017483.1 | MR4G025779.1        | 0.492714 | MR2G024066.1 | MR4G023611.1 | 0.523027 |
| MR0TCONS_00017483.1 | MR4G023328.1        | 0.484709 | MR2G024066.1 | MR8G001577.1 | 0.530571 |
| MR0TCONS_00017483.1 | MR1TCONS_00047494.1 | 0.467581 | MR2G024066.1 | MR8G003125.1 | 0.520559 |
| MR0TCONS_00017483.1 | MR1TCONS_00056373.1 | 0.457865 | MR2G024066.1 | MR8G001596.1 | 0.521705 |
| MR0TCONS_00017483.1 | MR1TCONS_00025928.1 | 0.463062 | MR2G024066.1 | MR4G026972.1 | 0.527714 |
| MR0TCONS_00017483.1 | MR0G027022.1        | 0.443096 | MR2G024066.1 | MR8G000678.2 | 0.524837 |
| MR0TCONS_00017483.1 | MR6G003925.1        | 0.468884 | MR2G024066.1 | MR4G021196.1 | 0.528696 |
| MR0TCONS_00017483.1 | MR6G006799.1        | 0.447178 | MR3G015757.1 | MR0G007424.1 | 0.525208 |
| MR0TCONS_00017483.1 | MR2G006156.1        | 0.455038 | MR3G015757.1 | MR6G007208.1 | 0.534927 |
| MR0TCONS_00017483.1 | MR3G026361.1        | 0.442768 | MR3G015757.1 | MR6G011265.1 | 0.520559 |
| MR0TCONS_00017483.1 | MR3G026562.1        | 0.468428 | MR3G015757.1 | MR6G015490.1 | 0.520719 |
| MR0TCONS_00017483.1 | MR0G006220.1        | 0.486098 | MR3G015757.1 | MR7G002562.1 | 0.537489 |
| MR0TCONS_00017483.1 | MR0G006609.1        | 0.471814 | MR3G015757.1 | MR6G005851.1 | 0.525129 |
| MR0TCONS_00017483.1 | MR1G028362.1        | 0.475992 | MR3G015757.1 | MR8G007621.1 | 0.540371 |
| MR0TCONS_00017483.1 | MR0G007114.1        | 0.480664 | MR3G015757.1 | MR0G007917.1 | 0.536056 |
| MR0TCONS_00017483.1 | MR1G029339.2        | 0.454724 | MR3G015757.1 | MR6G013325.1 | 0.536961 |
| MR0TCONS_00017483.1 | MR7G015326.1        | 0.460303 | MR3G015757.1 | MR0G013397.1 | 0.539903 |
| MR0TCONS_00017483.1 | MR0G022769.1        | 0.47378  | MR3G015757.1 | MR6G003659.1 | 0.52626  |
| MR0TCONS_00017483.1 | MR0G025657.1        | 0.490262 | MR3G015757.1 | MR6G023576.1 | 0.528902 |
| MR0TCONS_00017483.1 | MR3G014762.1        | 0.476613 | MR3G015757.1 | MR7G016713.1 | 0.540803 |
| MR0TCONS_00017483.1 | MR0G003971.1        | 0.459394 | MR3G015757.1 | MR7G014911.1 | 0.528414 |
| MR0TCONS_00017483.1 | MR3G015801.1        | 0.442965 | MR3G015757.1 | MR8G002087.1 | 0.526543 |
| MR0TCONS_00017483.1 | MR7TCONS_00002942.1 | 0.448832 | MR3G015757.1 | MR6G021640.1 | 0.52372  |
| MR0TCONS_00017483.1 | MR4G021077.5        | 0.493715 | MR3G015757.1 | MR4G021019.1 | 0.537563 |
| MR0TCONS_00017483.1 | MR4G022364.1        | 0.453277 | MR3G015757.1 | MR7G017822.1 | 0.525331 |
| MR0TCONS_00017483.1 | MR4G023063.1        | 0.480552 | MR3G015757.1 | MR7G022720.1 | 0.524608 |
| MR0TCONS_00017483.1 | MR4G023099.1        | 0.488117 | MR3G015757.1 | MR4G026972.1 | 0.530651 |
| MR0TCONS_00017483.1 | MR4G007287.2        | 0.48881  | MR3G015757.1 | MR3G021766.1 | 0.537608 |
| MR0TCONS_00017483.1 | MR0G007601.1        | 0.474967 | MR3G015757.1 | MR6G022644.1 | 0.531854 |
| MR0TCONS_00017483.1 | MR0G008632.2        | 0.490067 | MR3G015757.1 | MR4G028681.1 | 0.539336 |
| MR0TCONS_00017483.1 | MR4G007135.1        | 0.482432 | MR3G015757.1 | MR8G000679.2 | 0.52192  |
| MR0TCONS_00017483.1 | MR4G021049.1        | 0.443955 | MR3G015757.1 | MR8G001578.1 | 0.524193 |
| MR0TCONS_00017483.1 | MR2G001814.1        | 0.445857 | MR3G015757.1 | MR0G007264.1 | 0.530232 |
| MR0TCONS_00017483.1 | MR7G028821.1        | 0.480141 | MR3G015757.1 | MR8G002789.1 | 0.522778 |
| MR0TCONS_00017483.1 | MR4G018534.1        | 0.457298 | MR3G015757.1 | MR8G003125.1 | 0.540688 |
| MR0TCONS_00017483.1 | MR3TCONS_00012160.1 | 0.469943 | MR3G015757.1 | MR8G003357.1 | 0.522194 |
| MR0TCONS_00017483.1 | MR4G021219.4        | 0.450921 | MR3G015757.1 | MR4G021134.1 | 0.520525 |
| MR0TCONS_00017483.1 | MR4G021076.1        | 0.49464  | MR3G015757.1 | MR4G021195.1 | 0.522508 |
| MR0TCONS_00017483.1 | MR3G026615.1        | 0.480007 | MR3G015757.1 | MR4G001417.1 | 0.525443 |
| MR0TCONS_00017483.1 | MR4G009026.1        | 0.490048 | MR3G015757.1 | MR4G006774.1 | 0.527886 |
| MR0TCONS_00017483.1 | MR4G001427.1        | 0.480718 | MR3G015757.1 | MR4G023616.1 | 0.524015 |
| MR0TCONS_00017483.1 | MR4G002293.2        | 0.469186 | MR3G015757.1 | MR8G012676.1 | 0.53375  |
| MR0TCONS_00017483.1 | MR4G012554.1        | 0.452883 | MR3G015757.1 | MR8G012690.1 | 0.539385 |
| MR0TCONS_00017483.1 | MR4G016029.1        | 0.469926 | MR3G015757.1 | MR8G012742.1 | 0.523338 |

|                     |                     |          |              |                     |          |
|---------------------|---------------------|----------|--------------|---------------------|----------|
| MR0TCONS_00017483.1 | MR1TCONS_00020658.1 | 0.454865 | MR3G015757.1 | MR3G023792.1        | 0.522512 |
| MR1TCONS_00020658.1 | MR4G023099.1        | 0.462815 | MR3G015757.1 | MR4G008743.1        | 0.52002  |
| MR1TCONS_00020658.1 | MR5G020321.1        | 0.456762 | MR3G015757.1 | MR8G000678.2        | 0.537645 |
| MR1TCONS_00020658.1 | MR6G021435.1        | 0.456179 | MR3G015757.1 | MR7G007526.1        | 0.527777 |
| MR1TCONS_00020658.1 | MR6G018097.1        | 0.448233 | MR3G015757.1 | MR4G021021.3        | 0.522491 |
| MR1TCONS_00020658.1 | MR5G012384.1        | 0.456762 | MR3G015757.1 | MR5TCONS_00034061.1 | 0.526133 |
| MR1TCONS_00020658.1 | MR3G011063.1        | 0.46673  | MR3G015757.1 | MR8G012788.1        | 0.524723 |
| MR1TCONS_00020658.1 | MR7G024256.1        | 0.441777 | MR3G015757.1 | MR5G002859.1        | 0.523754 |
| MR1TCONS_00020658.1 | MR6G018074.1        | 0.45237  | MR3G015757.1 | MR4G023618.1        | 0.529348 |
| MR1TCONS_00020658.1 | MR4G021076.1        | 0.457026 | MR3G015757.1 | MR8G011209.1        | 0.522636 |
| MR1TCONS_00020658.1 | MR8G010083.1        | 0.459438 | MR3G015757.1 | MR8G011218.1        | 0.524262 |
| MR1TCONS_00020658.1 | MR8G020258.1        | 0.454109 | MR3G015757.1 | MR5G003500.1        | 0.534043 |
| MR1TCONS_00020658.1 | MR7G000150.1        | 0.451301 | MR3G015757.1 | MR4G015995.1        | 0.527538 |
| MR1TCONS_00020658.1 | MR6G018093.1        | 0.450264 | MR3G015757.1 | MR4G016473.3        | 0.521519 |
| MR1TCONS_00020658.1 | MR5G009648.1        | 0.461591 | MR3G015757.1 | MR8G019130.1        | 0.540813 |
| MR1TCONS_00020658.1 | MR5G009689.1        | 0.458412 | MR3G015757.1 | MR8G019531.1        | 0.527964 |
| MR1TCONS_00020658.1 | MR3G014762.1        | 0.442344 | MR3G015757.1 | MR5G003521.1        | 0.522211 |
| MR1TCONS_00020658.1 | MR4G009026.1        | 0.452212 | MR3G015757.1 | MR0G006455.1        | 0.520713 |
| MR1TCONS_00020658.1 | MR0G003728.1        | 0.453523 | MR3G015757.1 | MR8G024955.1        | 0.529208 |
| MR1TCONS_00020658.1 | MR4G007287.2        | 0.452989 | MR3G015757.1 | MR5G024481.1        | 0.524004 |
| MR1TCONS_00020658.1 | MR6G021647.1        | 0.440131 | MR3G015757.1 | MR5G010483.1        | 0.525811 |
| MR1TCONS_00020658.1 | MR6G025626.1        | 0.451642 | MR3G015757.1 | MR4G009044.1        | 0.534496 |
| MR1TCONS_00020658.1 | MR4G021077.5        | 0.464331 | MR3G015757.1 | MR5G024525.1        | 0.533539 |
| MR1TCONS_00020658.1 | MR5G011870.1        | 0.445363 | MR3G015757.1 | MR4G009043.1        | 0.526608 |
| MR2G007010.1        | MR5G012384.1        | 0.46137  | MR3G015757.1 | MR4G009608.1        | 0.52814  |
| MR2G007010.1        | MR5G009689.1        | 0.450924 | MR3G015757.1 | MR5G017247.1        | 0.54013  |
| MR2G007010.1        | MR5G009648.1        | 0.469187 | MR3G015757.1 | MR0G002914.1        | 0.541657 |
| MR2G007010.1        | MR7G024256.1        | 0.463148 | MR3G015757.1 | MR8G022192.1        | 0.52995  |
| MR2G007010.1        | MR3G011063.1        | 0.452488 | MR3G015757.1 | MR0G005135.1        | 0.533756 |
| MR2G007010.1        | MR8G019525.2        | 0.453391 | MR3G015757.1 | MR8G028457.1        | 0.525204 |
| MR2G007010.1        | MR4G023099.1        | 0.469444 | MR3G015757.1 | MR8G028462.1        | 0.539068 |
| MR2G007010.1        | MR6G018074.1        | 0.443449 | MR3G015757.1 | MR8G020746.1        | 0.540459 |
| MR2G007010.1        | MR6G021435.1        | 0.457088 | MR4G023618.1 | MR0G005287.1        | 0.536648 |
| MR2G007010.1        | MR5G020321.1        | 0.46137  | MR4G023618.1 | MR0G005900.1        | 0.528832 |
| MR2G007010.1        | MR6G016522.1        | 0.456606 | MR4G023618.1 | MR6G015490.1        | 0.525688 |
| MR2G007010.1        | MR4G009026.1        | 0.46924  | MR4G023618.1 | MR0G002914.1        | 0.538662 |
| MR2G007010.1        | MR4G021077.5        | 0.442062 | MR4G023618.1 | MR0G007917.1        | 0.536884 |
| MR2G007010.1        | MR0G022769.1        | 0.462418 | MR4G023618.1 | MR0G007264.1        | 0.541689 |
| MR2G007010.1        | MR4G007287.2        | 0.440452 | MR4G023618.1 | MR7G012077.1        | 0.521167 |
| MR2G007010.1        | MR3G001179.1        | 0.442676 | MR4G023618.1 | MR0G008817.1        | 0.538129 |
| MR2G007010.1        | MR4G021076.1        | 0.457068 | MR4G023618.1 | MR0G007880.1        | 0.53538  |
| MR2G007010.1        | MR0G001496.1        | 0.441845 | MR4G023618.1 | MR5G017247.1        | 0.539776 |
| MR2G016358.1        | MR4G023099.1        | 0.463687 | MR4G023618.1 | MR0G005135.1        | 0.536703 |
| MR2G016358.1        | MR5G009648.1        | 0.468392 | MR4G023618.1 | MR0G013397.1        | 0.540172 |
| MR2G016358.1        | MR8G019525.2        | 0.461023 | MR4G023618.1 | MR0G014428.1        | 0.524719 |
| MR2G016358.1        | MR4G009026.1        | 0.453128 | MR4G023618.1 | MR0G007648.1        | 0.522779 |
| MR2G016358.1        | MR8G015530.1        | 0.446214 | MR4G023618.1 | MR0G007649.1        | 0.522779 |
| MR2G016358.1        | MR5G009689.1        | 0.446725 | MR4G023618.1 | MR5G018745.1        | 0.53275  |
| MR2G016358.1        | MR5G012384.1        | 0.466637 | MR4G023618.1 | MR7G014360.1        | 0.520059 |
| MR2G016358.1        | MR6G021435.1        | 0.443454 | MR4G023618.1 | MR7G011549.1        | 0.52175  |

|              |              |          |              |                     |          |
|--------------|--------------|----------|--------------|---------------------|----------|
| MR2G016358.1 | MR6G016522.1 | 0.449165 | MR4G023618.1 | MR6G021640.1        | 0.523699 |
| MR2G016358.1 | MR7G024256.1 | 0.471182 | MR4G023618.1 | MR6G022644.1        | 0.540918 |
| MR2G016358.1 | MR6G021647.1 | 0.445545 | MR4G023618.1 | MR6G023576.1        | 0.539527 |
| MR2G016358.1 | MR4G021076.1 | 0.44365  | MR4G023618.1 | MR6G029291.1        | 0.526958 |
| MR2G016358.1 | MR5G020321.1 | 0.466637 | MR4G023618.1 | MR8G028462.1        | 0.540405 |
| MR2G016358.1 | MR8G018182.3 | 0.456402 | MR4G023618.1 | MR5G024481.1        | 0.521609 |
| MR2G016358.1 | MR0G022769.1 | 0.456784 | MR4G023618.1 | MR7G014376.1        | 0.538485 |
| MR4G021188.1 | MR6G018093.1 | 0.446038 | MR4G023618.1 | MR7G011363.5        | 0.535905 |
| MR4G021188.1 | MR5G009689.1 | 0.441113 | MR4G023618.1 | MR4G026757.1        | 0.538457 |
| MR4G021188.1 | MR0G001496.1 | 0.440897 | MR4G023618.1 | MR4G026972.1        | 0.539464 |
| MR4G021188.1 | MR5G011870.1 | 0.441155 | MR4G023618.1 | MR4G028681.1        | 0.537249 |
| MR5G011870.1 | MR6G010888.2 | 0.474159 | MR4G023618.1 | MR6G025256.1        | 0.537286 |
| MR5G011870.1 | MR6G018093.1 | 0.485572 | MR4G023618.1 | MR7G014900.1        | 0.523061 |
| MR5G011870.1 | MR6G025626.1 | 0.448659 | MR4G023618.1 | MR7G014911.1        | 0.532423 |
| MR5G011870.1 | MR7G016767.2 | 0.468082 | MR4G023618.1 | MR7G002562.1        | 0.536821 |
| MR5G011870.1 | MR6G016522.1 | 0.451126 | MR4G023618.1 | MR7G007524.1        | 0.537829 |
| MR5G011870.1 | MR8G012637.1 | 0.445799 | MR4G023618.1 | MR7G007526.1        | 0.538279 |
| MR5G011870.1 | MR8G010060.1 | 0.447292 | MR4G023618.1 | MR8G002765.1        | 0.538948 |
| MR5G011870.1 | MR6G007202.1 | 0.454813 | MR4G023618.1 | MR8G002789.1        | 0.53707  |
| MR5G011870.1 | MR8G011210.1 | 0.442677 | MR4G023618.1 | MR8G003125.1        | 0.538397 |
| MR5G011870.1 | MR6G000783.1 | 0.461006 | MR4G023618.1 | MR8G003345.1        | 0.536287 |
| MR5G011870.1 | MR6G003925.1 | 0.457201 | MR4G023618.1 | MR8G004551.1        | 0.52313  |
| MR5G011870.1 | MR8G010083.1 | 0.477826 | MR4G023618.1 | MR8G012690.1        | 0.53916  |
| MR5G011870.1 | MR0G007601.1 | 0.470532 | MR4G023618.1 | MR5G024525.1        | 0.540083 |
| MR5G011870.1 | MR6G025929.3 | 0.463053 | MR4G023618.1 | MR8G006636.1        | 0.524108 |
| MR5G011870.1 | MR6G016528.1 | 0.450016 | MR4G023618.1 | MR8G007621.1        | 0.539944 |
| MR5G011870.1 | MR6G006799.1 | 0.440989 | MR4G023618.1 | MR8G010076.1        | 0.541359 |
| MR5G011870.1 | MR6G018085.1 | 0.452907 | MR4G023618.1 | MR8G011180.1        | 0.529939 |
| MR5G011870.1 | MR0G001497.1 | 0.452843 | MR4G023618.1 | MR8G011203.1        | 0.526653 |
| MR5G011870.1 | MR6G018097.1 | 0.477099 | MR4G023618.1 | MR8G011209.1        | 0.525145 |
| MR5G011870.1 | MR6G018074.1 | 0.469332 | MR4G023618.1 | MR8G012676.1        | 0.536155 |
| MR5G011870.1 | MR8G018185.1 | 0.454848 | MR4G023618.1 | MR5G003500.1        | 0.535108 |
| MR5G011870.1 | MR5G025036.1 | 0.443103 | MR4G023618.1 | MR5G003521.1        | 0.533076 |
| MR5G011870.1 | MR6G021435.1 | 0.485718 | MR4G023618.1 | MR7G022721.1        | 0.524097 |
| MR5G011870.1 | MR6G021647.1 | 0.443507 | MR4G023618.1 | MR7G000279.1        | 0.52188  |
| MR5G011870.1 | MR6G025594.1 | 0.470822 | MR4G023618.1 | MR0G024306.1        | 0.534525 |
| MR5G011870.1 | MR5G011953.1 | 0.459249 | MR4G023618.1 | MR5G010171.1        | 0.529645 |
| MR5G011870.1 | MR7G022891.1 | 0.452977 | MR4G023618.1 | MR6G013343.1        | 0.52334  |
| MR5G011870.1 | MR7G024256.1 | 0.460165 | MR4G023618.1 | MR8G012742.1        | 0.523347 |
| MR5G011870.1 | MR7G028821.1 | 0.444347 | MR4G023618.1 | MR7G023875.1        | 0.523745 |
| MR5G011870.1 | MR5G017371.1 | 0.459842 | MR4G023618.1 | MR7G024245.1        | 0.527061 |
| MR5G011870.1 | MR5G020302.1 | 0.471225 | MR4G023618.1 | MR7G000837.1        | 0.523745 |
| MR5G011870.1 | MR5G020321.1 | 0.475774 | MR4G023618.1 | MR5G024527.1        | 0.52386  |
| MR5G011870.1 | MR8G018183.1 | 0.47118  | MR4G023618.1 | MR7G016713.1        | 0.539706 |
| MR5G011870.1 | MR5G025035.1 | 0.46739  | MR4G023618.1 | MR7G016747.1        | 0.524078 |
| MR5G011870.1 | MR6G019911.1 | 0.46737  | MR4G023618.1 | MR5TCONS_00034061.1 | 0.541615 |
| MR5G011870.1 | MR6G020073.2 | 0.452649 | MR4G023618.1 | MR8G001578.1        | 0.521908 |
| MR5G011870.1 | MR0G006220.1 | 0.461164 | MR4G023618.1 | MR7G022720.1        | 0.540862 |
| MR5G011870.1 | MR0G006609.1 | 0.454723 | MR4G023618.1 | MR8G001596.1        | 0.527766 |
| MR5G011870.1 | MR8G020258.1 | 0.486505 | MR4G023618.1 | MR8G022192.1        | 0.541173 |

|              |                     |          |              |                     |          |
|--------------|---------------------|----------|--------------|---------------------|----------|
| MR5G011870.1 | MR8G020616.1        | 0.462751 | MR4G023618.1 | MR8G000662.1        | 0.53138  |
| MR5G011870.1 | MR8G020766.1        | 0.451809 | MR4G023618.1 | MR8G019531.1        | 0.538285 |
| MR5G011870.1 | MR8G021808.1        | 0.459    | MR4G023618.1 | MR8G000678.2        | 0.540336 |
| MR5G011870.1 | MR8G022503.2        | 0.462493 | MR4G023618.1 | MR8G001590.1        | 0.520116 |
| MR5G011870.1 | MR8G027384.1        | 0.453907 | MR4G023618.1 | MR8G020746.1        | 0.540128 |
| MR5G011870.1 | MR0G001496.1        | 0.471098 | MR4G023618.1 | MR7G024817.1        | 0.534508 |
| MR5G011870.1 | MR5G021736.1        | 0.464697 | MR4G023618.1 | MR6G013295.1        | 0.526428 |
| MR5G011870.1 | MR8G012696.1        | 0.457895 | MR4G023618.1 | MR6G013325.1        | 0.540984 |
| MR5G011870.1 | MR7G008145.3        | 0.449895 | MR4G023618.1 | MR7TCONS_00020974.1 | 0.537245 |
| MR5G011870.1 | MR7G010680.1        | 0.446847 | MR4G023618.1 | MR8G020754.1        | 0.536334 |
| MR5G011870.1 | MR7G012054.1        | 0.443211 | MR4G023618.1 | MR6G010863.1        | 0.526997 |
| MR5G011870.1 | MR7G015326.1        | 0.443009 | MR4G023618.1 | MR6G011265.1        | 0.529657 |
| MR5G011870.1 | MR0G007114.1        | 0.470496 | MR4G023618.1 | MR5G024989.2        | 0.534661 |
| MR5G011870.1 | MR7G000150.1        | 0.477969 | MR4G023618.1 | MR8G001577.1        | 0.538664 |
| MR5G011870.1 | MR0G008632.2        | 0.464974 | MR4G023618.1 | MR6G010787.1        | 0.525732 |
| MR5G011870.1 | MR6TCONS_00003668.1 | 0.462046 | MR4G023618.1 | MR6G009339.2        | 0.533501 |
| MR5G011870.1 | MR7G000148.1        | 0.45052  | MR4G023618.1 | MR8G019130.1        | 0.539712 |
| MR5G011870.1 | MR5G024537.1        | 0.473517 | MR4G023618.1 | MR8G016813.1        | 0.536452 |
| MR5G011870.1 | MR7G000813.2        | 0.457432 | MR4G023618.1 | MR6G007208.1        | 0.538197 |
| MR5G011870.1 | MR0G027022.1        | 0.457528 | MR4G023618.1 | MR8G012788.1        | 0.539081 |
| MR5G011870.1 | MR6G019866.1        | 0.454134 | MR4G023618.1 | MR6G005848.1        | 0.526664 |
| MR5G011870.1 | MR7G016748.1        | 0.446865 | MR6G011265.1 | MR8G000678.2        | 0.53772  |
| MR5G011870.1 | MR0G004687.1        | 0.459993 | MR6G011265.1 | MR8G002087.1        | 0.520617 |
| MR5G011870.1 | MR0G005280.1        | 0.458037 | MR6G011265.1 | MR8G007621.1        | 0.540719 |
| MR5G011870.1 | MR0G005933.1        | 0.467711 | MR6G011265.1 | MR8G024955.1        | 0.523499 |
| MR5G011870.1 | MR5G017115.1        | 0.455922 | MR6G011265.1 | MR0G002914.1        | 0.54173  |
| MR5G011870.1 | MR5G017134.1        | 0.453161 | MR6G011265.1 | MR8G028462.1        | 0.539114 |
| MR5G011870.1 | MR5G012384.1        | 0.475774 | MR6G011265.1 | MR8G022192.1        | 0.530247 |
| MR5G011870.1 | MR5G015914.1        | 0.449914 | MR6G011265.1 | MR6G022644.1        | 0.532105 |
| MR5G011870.1 | MR7G000834.1        | 0.466713 | MR6G011265.1 | MR6G023576.1        | 0.529569 |
| MR5G011870.1 | MR0G003728.1        | 0.471378 | MR6G011265.1 | MR8G020746.1        | 0.540604 |
| MR5G011870.1 | MR5G017299.1        | 0.465889 | MR6G011265.1 | MR8G012788.1        | 0.526658 |
| MR5G011870.1 | MR0G025657.1        | 0.466968 | MR6G011265.1 | MR6G013325.1        | 0.537226 |
| MR5G011870.1 | MR7G004995.1        | 0.458969 | MR6G011265.1 | MR8G003125.1        | 0.54081  |
| MR5G011870.1 | MR0G022769.1        | 0.440819 | MR6G011265.1 | MR8G019531.1        | 0.52822  |
| MR5G011870.1 | MR7G007720.1        | 0.46368  | MR6G011265.1 | MR8G002789.1        | 0.523641 |
| MR5G024537.1 | MR6G018097.1        | 0.470451 | MR6G011265.1 | MR0G005135.1        | 0.534216 |
| MR5G024537.1 | MR6G018093.1        | 0.478522 | MR6G011265.1 | MR8G012676.1        | 0.533276 |
| MR5G024537.1 | MR8G010083.1        | 0.475887 | MR6G011265.1 | MR8G012690.1        | 0.539222 |
| MR5G024537.1 | MR0G025657.1        | 0.452024 | MR6G011265.1 | MR7G002562.1        | 0.537778 |
| MR5G024537.1 | MR6G018074.1        | 0.460634 | MR6G011265.1 | MR8G019130.1        | 0.541088 |
| MR5G024537.1 | MR0G007601.1        | 0.443294 | MR6G011265.1 | MR0G007917.1        | 0.536047 |
| MR5G024537.1 | MR6G019911.1        | 0.457689 | MR6G011265.1 | MR7G007524.1        | 0.520885 |
| MR5G024537.1 | MR6G021435.1        | 0.47794  | MR6G011265.1 | MR7G007526.1        | 0.529906 |
| MR5G024537.1 | MR0G003728.1        | 0.467275 | MR6G011265.1 | MR0G007264.1        | 0.530338 |
| MR5G024537.1 | MR7G024256.1        | 0.459904 | MR6G011265.1 | MR7G022720.1        | 0.524105 |
| MR5G024537.1 | MR8G018183.1        | 0.456511 | MR6G011265.1 | MR0G013397.1        | 0.540394 |
| MR5G024537.1 | MR6G025594.1        | 0.451637 | MR6G011265.1 | MR7G014911.1        | 0.528715 |
| MR5G024537.1 | MR5G025035.1        | 0.448882 | MR6G011265.1 | MR7G016713.1        | 0.541077 |
| MR5G024537.1 | MR6G010888.2        | 0.444409 | MR6G021640.1 | MR8G020746.1        | 0.53803  |

|              |              |          |              |              |          |
|--------------|--------------|----------|--------------|--------------|----------|
| MR5G024537.1 | MR0G001496.1 | 0.461903 | MR6G021640.1 | MR8G012788.1 | 0.524295 |
| MR5G024537.1 | MR7G000150.1 | 0.474312 | MR6G021640.1 | MR8G019531.1 | 0.522729 |
| MR5G024537.1 | MR8G020258.1 | 0.482588 | MR6G021640.1 | MR8G019130.1 | 0.538959 |
| MR6G000783.1 | MR8G020258.1 | 0.472397 | MR6G021640.1 | MR8G012690.1 | 0.535902 |
| MR6G000783.1 | MR7G024256.1 | 0.454401 | MR6G021640.1 | MR8G012676.1 | 0.533942 |
| MR6G000783.1 | MR6G016522.1 | 0.448749 | MR6G021640.1 | MR8G028462.1 | 0.536035 |
| MR6G000783.1 | MR6G018074.1 | 0.459446 | MR6G021640.1 | MR0G002914.1 | 0.539876 |
| MR6G000783.1 | MR8G018183.1 | 0.455668 | MR6G021640.1 | MR0G013397.1 | 0.537214 |
| MR6G000783.1 | MR6G021435.1 | 0.476382 | MR6G021640.1 | MR8G022192.1 | 0.524452 |
| MR6G000783.1 | MR0G008632.2 | 0.443926 | MR6G021640.1 | MR8G024955.1 | 0.522277 |
| MR6G000783.1 | MR8G010083.1 | 0.472043 | MR6G021640.1 | MR0G007264.1 | 0.52456  |
| MR6G000783.1 | MR6G018093.1 | 0.47111  | MR6G021640.1 | MR7G002562.1 | 0.53773  |
| MR6G000783.1 | MR6G025594.1 | 0.450455 | MR6G021640.1 | MR7G007526.1 | 0.525444 |
| MR6G000783.1 | MR6G025626.1 | 0.448924 | MR6G021640.1 | MR7G016713.1 | 0.538953 |
| MR6G000783.1 | MR7G000150.1 | 0.465051 | MR6G021640.1 | MR6G022644.1 | 0.526621 |
| MR6G000783.1 | MR6G018097.1 | 0.465056 | MR6G021640.1 | MR6G023576.1 | 0.523472 |
| MR6G000783.1 | MR8G018185.1 | 0.442295 | MR6G021640.1 | MR0G007917.1 | 0.536525 |
| MR6G000783.1 | MR0G003728.1 | 0.466568 | MR6G021640.1 | MR8G007621.1 | 0.538128 |
| MR6G000783.1 | MR6G021647.1 | 0.444706 | MR6G021640.1 | MR7G014911.1 | 0.530681 |
| MR6G000783.1 | MR6G019911.1 | 0.45073  | MR6G021640.1 | MR0G005135.1 | 0.534636 |
| MR6G000783.1 | MR0G001496.1 | 0.46584  | MR6G021640.1 | MR8G011180.1 | 0.521396 |
| MR6G001563.1 | MR6G020073.2 | 0.450618 | MR6G021640.1 | MR8G003125.1 | 0.537629 |
| MR6G001563.1 | MR0G001496.1 | 0.448847 | MR6G021640.1 | MR8G000678.2 | 0.533645 |
| MR6G008503.1 | MR0G001496.1 | 0.452374 | MR7G000837.1 | MR0G007264.1 | 0.524313 |
| MR6G008503.1 | MR6G019911.1 | 0.440289 | MR7G000837.1 | MR8G003125.1 | 0.523283 |
| MR6G018085.1 | MR7G000150.1 | 0.455636 | MR7G000837.1 | MR8G002765.1 | 0.520098 |
| MR6G018085.1 | MR7G024256.1 | 0.458712 | MR7G000837.1 | MR8G012690.1 | 0.523035 |
| MR6G018085.1 | MR0G025657.1 | 0.452779 | MR7G000837.1 | MR8G022192.1 | 0.523307 |
| MR6G018085.1 | MR6G021647.1 | 0.450705 | MR7G000837.1 | MR8G000678.2 | 0.524446 |
| MR6G018085.1 | MR8G010083.1 | 0.455147 | MR7G000837.1 | MR8G019531.1 | 0.521985 |
| MR6G018085.1 | MR6G021435.1 | 0.466698 | MR7G007524.1 | MR8G000678.2 | 0.536501 |
| MR6G018085.1 | MR0G003728.1 | 0.451408 | MR7G007524.1 | MR8G001577.1 | 0.534468 |
| MR6G018085.1 | MR6G019911.1 | 0.471219 | MR7G007524.1 | MR8G000662.1 | 0.529195 |
| MR6G018085.1 | MR6G018093.1 | 0.458608 | MR7G007524.1 | MR8G022192.1 | 0.537547 |
| MR6G018085.1 | MR0G001496.1 | 0.459988 | MR7G007524.1 | MR8G020746.1 | 0.532929 |
| MR6G018085.1 | MR8G020258.1 | 0.460943 | MR7G007524.1 | MR8G001596.1 | 0.525999 |
| MR6G018085.1 | MR6G018097.1 | 0.456111 | MR7G007524.1 | MR8G002765.1 | 0.535122 |
| MR7G010680.1 | MR0G025657.1 | 0.461538 | MR7G007524.1 | MR8G016813.1 | 0.533655 |
| MR7G010680.1 | MR0G003728.1 | 0.448826 | MR7G007524.1 | MR8G019130.1 | 0.532336 |
| MR7G010680.1 | MR8G010083.1 | 0.442579 | MR7G007524.1 | MR8G019531.1 | 0.533347 |
| MR7G010680.1 | MR8G018183.1 | 0.441572 | MR7G007524.1 | MR8G006636.1 | 0.52306  |
| MR7G010680.1 | MR8G020258.1 | 0.459933 | MR7G007524.1 | MR8G020754.1 | 0.532877 |
| MR7G010680.1 | MR0G001496.1 | 0.479472 | MR7G007524.1 | MR7G007526.1 | 0.532863 |
| MR7G010680.1 | MR7G024256.1 | 0.455577 | MR7G007524.1 | MR8G012788.1 | 0.532665 |
| MR7G015326.1 | MR0G007601.1 | 0.446785 | MR7G007524.1 | MR8G002789.1 | 0.531893 |
| MR7G015326.1 | MR0G003728.1 | 0.456158 | MR7G007524.1 | MR8G003125.1 | 0.534156 |
| MR7G015326.1 | MR0G005933.1 | 0.443643 | MR7G007524.1 | MR8G003345.1 | 0.5328   |
| MR7G015326.1 | MR8G018183.1 | 0.451581 | MR7G007524.1 | MR8G004551.1 | 0.522253 |
| MR7G015326.1 | MR8G020258.1 | 0.45787  | MR7G007524.1 | MR8G007621.1 | 0.532814 |
| MR7G015326.1 | MR0G007114.1 | 0.447258 | MR7G007524.1 | MR7G024817.1 | 0.532404 |

|              |              |          |              |                     |          |
|--------------|--------------|----------|--------------|---------------------|----------|
| MR7G024824.1 | MR0G025657.1 | 0.448245 | MR7G007524.1 | MR7TCONS_00020974.1 | 0.534238 |
| MR8G020751.1 | MR0G001496.1 | 0.448847 | MR7G007524.1 | MR0G024306.1        | 0.532831 |
| MR8G021808.1 | MR0G001496.1 | 0.449382 | MR7G007524.1 | MR8G012676.1        | 0.527399 |
| MR8G021808.1 | MR8G022503.2 | 0.448402 | MR7G007524.1 | MR0G002914.1        | 0.531184 |
| MR8G021808.1 | MR0G007601.1 | 0.460024 | MR7G007524.1 | MR7G011363.5        | 0.533178 |
| MR8G021808.1 | MR0G003728.1 | 0.455608 | MR7G007524.1 | MR8G012690.1        | 0.534565 |
| MR8G021808.1 | MR0G007114.1 | 0.448266 | MR7G007524.1 | MR0G007648.1        | 0.521997 |
| MR8G027384.1 | MR0G001496.1 | 0.466679 | MR7G007524.1 | MR0G007649.1        | 0.521997 |
| MR8G027384.1 | MR0G022769.1 | 0.440792 | MR7G007524.1 | MR0G005135.1        | 0.528117 |
| MR8G027384.1 | MR0G025657.1 | 0.481543 | MR7G007524.1 | MR0G008817.1        | 0.534037 |
| MR8G027384.1 | MR0G003728.1 | 0.446691 | MR7G007524.1 | MR0G013397.1        | 0.533432 |
| MR8G027384.1 | MR0G005933.1 | 0.45634  | MR7G007524.1 | MR0G014428.1        | 0.520921 |
|              |              |          | MR7G007524.1 | MR8G028462.1        | 0.533497 |
|              |              |          | MR7G007524.1 | MR0G007880.1        | 0.533984 |
|              |              |          | MR7G007524.1 | MR0G005900.1        | 0.527209 |
|              |              |          | MR7G007524.1 | MR0G007264.1        | 0.538765 |
|              |              |          | MR7G007524.1 | MR7G016747.1        | 0.520138 |
|              |              |          | MR7G007524.1 | MR0G007917.1        | 0.528177 |
|              |              |          | MR7G007524.1 | MR0G005287.1        | 0.533071 |
|              |              |          | MR7G007524.1 | MR8G010076.1        | 0.537752 |
|              |              |          | MR7G007524.1 | MR8G011180.1        | 0.520369 |
|              |              |          | MR7G007524.1 | MR8G011203.1        | 0.525241 |
|              |              |          | MR7G007524.1 | MR7G016713.1        | 0.532324 |
|              |              |          | MR7G007524.1 | MR7G022720.1        | 0.534779 |
|              |              |          | MR7G007524.1 | MR7G014911.1        | 0.523144 |
|              |              |          | MR7G007524.1 | MR7G022721.1        | 0.523135 |
|              |              |          | MR7G007524.1 | MR7G014376.1        | 0.534451 |
|              |              |          | MR7G023875.1 | MR8G000678.2        | 0.524446 |
|              |              |          | MR7G023875.1 | MR8G019531.1        | 0.521985 |
|              |              |          | MR7G023875.1 | MR8G012690.1        | 0.523035 |
|              |              |          | MR7G023875.1 | MR8G002765.1        | 0.520098 |
|              |              |          | MR7G023875.1 | MR8G003125.1        | 0.523283 |
|              |              |          | MR7G023875.1 | MR8G022192.1        | 0.523307 |
|              |              |          | MR7G023875.1 | MR0G007264.1        | 0.524313 |
|              |              |          | MR8G001578.1 | MR8G003125.1        | 0.536478 |
|              |              |          | MR8G001578.1 | MR8G028462.1        | 0.534865 |
|              |              |          | MR8G001578.1 | MR8G012690.1        | 0.534664 |
|              |              |          | MR8G001578.1 | MR8G007621.1        | 0.537178 |
|              |              |          | MR8G001578.1 | MR0G002914.1        | 0.539009 |
|              |              |          | MR8G001578.1 | MR0G005135.1        | 0.53445  |
|              |              |          | MR8G001578.1 | MR8G012676.1        | 0.533492 |
|              |              |          | MR8G001578.1 | MR8G024955.1        | 0.52013  |
|              |              |          | MR8G001578.1 | MR0G007264.1        | 0.522738 |
|              |              |          | MR8G001578.1 | MR8G011180.1        | 0.521821 |
|              |              |          | MR8G001578.1 | MR0G007917.1        | 0.536206 |
|              |              |          | MR8G001578.1 | MR0G013397.1        | 0.536152 |
|              |              |          | MR8G001578.1 | MR8G020746.1        | 0.537023 |
|              |              |          | MR8G001578.1 | MR8G022192.1        | 0.522691 |
|              |              |          | MR8G001578.1 | MR8G012788.1        | 0.523719 |
|              |              |          | MR8G001578.1 | MR8G019130.1        | 0.538093 |

|              |              |          |
|--------------|--------------|----------|
| MR8G001578.1 | MR8G019531.1 | 0.521154 |
| MR8G010076.1 | MR8G016813.1 | 0.526733 |
| MR8G010076.1 | MR8G019130.1 | 0.530289 |
| MR8G010076.1 | MR8G012690.1 | 0.53721  |
| MR8G010076.1 | MR8G012788.1 | 0.522893 |
| MR8G010076.1 | MR0G007264.1 | 0.541778 |
| MR8G010076.1 | MR0G007880.1 | 0.529744 |
| MR8G010076.1 | MR0G008817.1 | 0.537016 |
| MR8G010076.1 | MR0G013397.1 | 0.534407 |
| MR8G010076.1 | MR0G024306.1 | 0.52582  |
| MR8G010076.1 | MR8G019531.1 | 0.537166 |
| MR8G010076.1 | MR8G020746.1 | 0.533029 |
| MR8G010076.1 | MR8G020754.1 | 0.531865 |
| MR8G010076.1 | MR8G022192.1 | 0.541091 |
| MR8G010076.1 | MR8G028462.1 | 0.535022 |
| MR8G010076.1 | MR0G002914.1 | 0.530204 |
| MR8G010076.1 | MR0G005287.1 | 0.532358 |

---

**Table S14.** Annotation of genes in light-green module

| Gene ID             | Nr annotation                                                                                                                                                                                                                                                                                                        |
|---------------------|----------------------------------------------------------------------------------------------------------------------------------------------------------------------------------------------------------------------------------------------------------------------------------------------------------------------|
| MR0TCONS_00017483.1 | MR0TCONS_00017483.1//1Carya illinoensis 1-aminocyclopropane-1-carboxylate oxidase homolog 4-like (LOC122314425), mRNA                                                                                                                                                                                                |
| MR5G011870.1        | XP_018856839.1//PREDICTED: dof zinc finger protein DOF5.4-like [Juglans regia]                                                                                                                                                                                                                                       |
| MR1TCONS_00020658.1 | PREDICTED: Juglans regia transcription repressor MYB5-like (LOC108982488), mRNA                                                                                                                                                                                                                                      |
| MR6G000783.1        | XP_018811162.1//PREDICTED: serine/threonine-protein kinase SAPK7-like [Juglans regia];XP_022157841.1//serine/threonine-protein kinase SRK2H-like [Momordica charantia]                                                                                                                                               |
| MR2G007010.1        | XP_018810380.1//PREDICTED: ethylene-responsive transcription factor 4-like [Juglans regia]                                                                                                                                                                                                                           |
| MR5G024537.1        | XP_018809309.1//PREDICTED: BTB/POZ and TAZ domain-containing protein 4-like isoform X2 [Juglans regia];XP_018809308.1//PREDICTED: BTB/POZ and TAZ domain-containing protein 4-like isoform X1 [Juglans regia];XP_018809310.1//PREDICTED: BTB/POZ and TAZ domain-containing protein 4-like isoform X3 [Juglans regia] |
| MR2G016358.1        | XP_018826227.1//PREDICTED: ethylene-overproduction protein 1 [Juglans regia]                                                                                                                                                                                                                                         |
| MR6G018085.1        | XP_018834937.1//PREDICTED: nascent polypeptide-associated complex subunit beta-like [Juglans regia];XP_018834144.1//PREDICTED: LOW QUALITY PROTEIN: auxin response factor 8-like [Juglans regia]                                                                                                                     |
| MR0G001496.1        | ABW06959.1//isopentenyl pyrophosphate isomerase [Corylus avellana];XP_016488563.1//PREDICTED: isopentenyl-diphosphate Delta-isomerase I [Nicotiana tabacum];XP_009608528.1//PREDICTED: isopentenyl-diphosphate Delta-isomerase I [Nicotiana tomentosiformis]                                                         |
| MR0G003728.1        | XP_018835416.1//PREDICTED: uncharacterized protein LOC109002223 [Juglans regia];XP_017183988.1//PREDICTED: 30S ribosomal protein S18-like [Malus domestica]                                                                                                                                                          |
| MR7G024256.1        | XP_018815083.1//PREDICTED: phosphatidylinositol 3-kinase, root isoform isoform X3 [Juglans regia]                                                                                                                                                                                                                    |
| MR7G010680.1        | XP_018852422.1//PREDICTED: cytosolic sulfotransferase 5-like [Juglans regia];XP_021824417.1//cytosolic sulfotransferase 12-like [Prunus avium]                                                                                                                                                                       |
| MR6G021435.1        | XP_022009881.1//ras-related protein RHN1-like [Helianthus annuus];XP_002272169.1//PREDICTED: ras-related protein Rab5 [Vitis vinifera]                                                                                                                                                                               |
| MR8G020258.1        | XP_004495676.1//PREDICTED: syntaxin-41 isoform X1 [Cicer arietinum];XP_018848003.1//PREDICTED: syntaxin-41-like [Juglans regia]                                                                                                                                                                                      |
| MR7G015326.1        | EOY23226.1//Alpha/beta-Hydrolases superfamily protein isoform 1 [Theobroma cacao];XP_018859358.1//PREDICTED: uncharacterized protein At3g49055 [Juglans regia]                                                                                                                                                       |
| MR6G018093.1        | XP_018825951.1//PREDICTED: 40S ribosomal protein S21-2-like [Juglans regia]                                                                                                                                                                                                                                          |
| MR8G010083.1        | CBI28434.3//unnamed protein product, partial [Vitis vinifera];XP_022154866.1//transcription initiation factor TFIID subunit 15b [Momordica charantia]                                                                                                                                                                |
| MR8G021808.1        | XP_018845751.1//PREDICTED: protein TIFY 8-like isoform X2 [Juglans regia]                                                                                                                                                                                                                                            |
| MR8G027384.1        | XP_018833641.1//PREDICTED: zinc finger protein CONSTANS-LIKE 4-like [Juglans regia]                                                                                                                                                                                                                                  |
| MR0G025657.1        | OMO84962.1//hypothetical protein CCACVL1_10519 [Corchorus capsularis];XP_018809182.1//PREDICTED: protein trichome birefringence-like 35 [Juglans regia]                                                                                                                                                              |
| MR6G018097.1        | XP_018834942.1//PREDICTED: probable metal-nicotianamine transporter YSL7 [Juglans regia]                                                                                                                                                                                                                             |
| MR6G018074.1        | XP_018834139.1//PREDICTED: ribosomal RNA-processing protein 7 homolog A [Juglans regia]                                                                                                                                                                                                                              |
| MR6G021647.1        | XP_018834113.1//PREDICTED: protein CROWDED NUCLEI 1-like [Juglans regia]                                                                                                                                                                                                                                             |
| MR6G019911.1        | XP_018844883.1//PREDICTED: non-specific phospholipase C1-like [Juglans regia]                                                                                                                                                                                                                                        |
| MR7G000150.1        | XP_004136918.1//PREDICTED: DUF21 domain-containing protein At2g14520-like [Cucumis sativus]                                                                                                                                                                                                                          |
| MR8G018183.1        | XP_016480921.1//PREDICTED: FACT complex subunit SPT16-like [Nicotiana tabacum];XP_018816427.1//PREDICTED: FACT complex subunit SPT16-like [Juglans regia]                                                                                                                                                            |

|              |                                                                                                                                                                                                               |
|--------------|---------------------------------------------------------------------------------------------------------------------------------------------------------------------------------------------------------------|
| MR5G009689.1 | XP_018825404.1//PREDICTED: protein ASPARTIC PROTEASE IN GUARD CELL 1-like [Juglans regia]                                                                                                                     |
| MR5G012384.1 | XP_018844074.1//PREDICTED: chaperone protein dnaJ 20, chloroplastic-like [Juglans regia]                                                                                                                      |
| MR6G016522.1 | XP_018844750.1//PREDICTED: WD repeat-containing protein VIP3 [Juglans regia]                                                                                                                                  |
| MR5G020321.1 | XP_018844074.1//PREDICTED: chaperone protein dnaJ 20, chloroplastic-like [Juglans regia]                                                                                                                      |
| MR0G022769.1 | XP_018818044.1//PREDICTED: pentatricopeptide repeat-containing protein At5g48730, chloroplastic [Juglans regia]                                                                                               |
| MR0G007601.1 | XP_018809559.1//PREDICTED: ER membrane protein complex subunit 3-like [Juglans regia]                                                                                                                         |
| MR6G025626.1 | CBI40053.3//unnamed protein product, partial [Vitis vinifera];XP_018849247.1//PREDICTED: ribulose-phosphate 3-epimerase, cytoplasmic isoform [Juglans regia]                                                  |
| MR5G009648.1 | XP_018813119.1//PREDICTED: uncharacterized protein LOC108985314 [Juglans regia]                                                                                                                               |
| MR6G025594.1 | XP_018814333.1//PREDICTED: probable carboxylesterase 11 [Juglans regia]                                                                                                                                       |
| MR0G005933.1 | XP_018857760.1//PREDICTED: phosphoglycerate mutase-like protein 4 [Juglans regia]                                                                                                                             |
| MR0G007114.1 | XP_018832001.1//PREDICTED: Golgi apparatus membrane protein-like protein ECHIDNA isoform X1 [Juglans regia]                                                                                                   |
| MR4G023099.1 | XP_018849388.1//PREDICTED: dol-P-Man:Man(6)GlcNAc(2)-PP-Dol alpha-1,2-mannosyltransferase [Juglans regia]                                                                                                     |
| MR4G021076.1 | XP_018811726.1//PREDICTED: elongation factor Tu, chloroplastic [Juglans regia]                                                                                                                                |
| MR4G009026.1 | XP_018835191.1//PREDICTED: uncharacterized protein LOC109002062 [Juglans regia];XP_006476326.1//PREDICTED: WD repeat-containing protein YMR102C-like [Citrus sinensis]                                        |
| MR4G021188.1 | XP_018847281.1//PREDICTED: growth-regulating factor 7-like [Juglans regia]                                                                                                                                    |
| MR6G020073.2 | KHN31394.1//Histone H3.3 [Glycine soja];KOM39698.1//hypothetical protein LR48_Vigan03g308000 [Vigna angularis]                                                                                                |
| MR8G018185.1 | XP_018816525.1//PREDICTED: ATP-citrate synthase alpha chain protein 3 [Juglans regia]                                                                                                                         |
| MR8G019525.2 | XP_018831555.1//PREDICTED: protease Do-like 9 [Juglans regia]                                                                                                                                                 |
| MR3G011063.1 | XP_018846745.1//PREDICTED: bifunctional fucokinase/fucose pyrophosphorylase isoform X1 [Juglans regia];XP_018846747.1//PREDICTED: bifunctional fucokinase/fucose pyrophosphorylase isoform X3 [Juglans regia] |
| MR8G022503.2 | XP_009418690.1//PREDICTED: probable protein phosphatase 2C 60 isoform X1 [Musa acuminata subsp. malaccensis];XP_021604217.1//probable protein phosphatase 2C 46 [Manihot esculenta]                           |
| MR6G008503.1 | XP_018808737.1//PREDICTED: protein ULTRAPETALA 1-like [Juglans regia]                                                                                                                                         |
| MR5G025035.1 | XP_018806781.1//PREDICTED: ERAD-associated E3 ubiquitin-protein ligase component HRD3A [Juglans regia]                                                                                                        |
| MR6G010888.2 | XP_018827742.1//PREDICTED: protein starmaker isoform X1 [Juglans regia]                                                                                                                                       |
| MR6G001563.1 | XP_018851434.1//PREDICTED: transcription factor bHLH106-like isoform X3 [Juglans regia]                                                                                                                       |
| MR4G021077.5 | XP_018850913.1//PREDICTED: choline transporter-like protein 2 [Juglans regia];XP_021288033.1//choline transporter protein 1 [Herrania umbratica]                                                              |
| MR4G007287.2 | OMO79913.1//Ribosomal protein L11 [Cochorus capsularis]                                                                                                                                                       |
| MR0G008632.2 | OVA12420.1//SecY/SEC61-alpha family [Macleaya cordata]                                                                                                                                                        |
| MR7G000813.2 | XP_018857020.1//PREDICTED: peptidyl-prolyl cis-trans isomerase CYP23 [Juglans regia];XP_012478677.1//PREDICTED: peptidyl-prolyl cis-trans isomerase CYP23 isoform X2 [Gossypium raimondii]                    |
| MR5G011953.1 | XP_018822108.1//PREDICTED: KH domain-containing protein HEN4-like [Juglans regia]                                                                                                                             |

|              |                                                                                                                                                                                                                                                                                                                                                                                     |
|--------------|-------------------------------------------------------------------------------------------------------------------------------------------------------------------------------------------------------------------------------------------------------------------------------------------------------------------------------------------------------------------------------------|
| MR7G000148.1 | XP_018847079.1//PREDICTED: LL-diaminopimelate aminotransferase, chloroplastic-like [Juglans regia]                                                                                                                                                                                                                                                                                  |
| MR3G001179.1 | XP_018820114.1//PREDICTED: oxidation resistance protein 1-like [Juglans regia];XP_020411452.1//TLD domain-containing protein 2 isoform X2 [Prunus persica]                                                                                                                                                                                                                          |
| MR6G019866.1 | XP_018830700.1//PREDICTED: probable transcriptional regulator SLK2 isoform X2 [Juglans regia]                                                                                                                                                                                                                                                                                       |
| MR6G016528.1 | XP_018844863.1//PREDICTED: mitogen-activated protein kinase kinase 2 [Juglans regia]                                                                                                                                                                                                                                                                                                |
| MR8G012637.1 | XP_002528798.1//PREDICTED: ATP synthase subunit delta', mitochondrial [Ricinus communis]                                                                                                                                                                                                                                                                                            |
| MR6G025929.3 | CAN75406.1//hypothetical protein VITISV_010510, partial [Vitis vinifera];XP_018837505.1//PREDICTED: ras-related protein Rab7-like [Juglans regia]                                                                                                                                                                                                                                   |
| MR5G025036.1 | XP_018806781.1//PREDICTED: ERAD-associated E3 ubiquitin-protein ligase component HRD3A [Juglans regia]                                                                                                                                                                                                                                                                              |
| MR5G015914.1 | XP_002511419.1//PREDICTED: serine/threonine-protein kinase HT1 [Ricinus communis];XP_012481903.1//PREDICTED: serine/threonine-protein kinase HT1 [Gossypium raimondii];XP_017191584.1//PREDICTED: serine/threonine-protein kinase STY8-like [Malus domestica]                                                                                                                       |
| MR5G017115.1 | XP_018811557.1//PREDICTED: probable bifunctional TENA-E protein [Juglans regia]                                                                                                                                                                                                                                                                                                     |
| MR5G017134.1 | XP_018809451.1//PREDICTED: acetate/butyrate--CoA ligase AAE7, peroxisomal [Juglans regia]                                                                                                                                                                                                                                                                                           |
| MR8G020616.1 | XP_018812868.1//PREDICTED: uncharacterized protein LOC108985139 [Juglans regia]                                                                                                                                                                                                                                                                                                     |
| MR8G012696.1 | XP_018822229.1//PREDICTED: protein WVD2-like 6 isoform X2 [Juglans regia]                                                                                                                                                                                                                                                                                                           |
| MR8G015530.1 | XP_018829633.1//PREDICTED: proteasome subunit alpha type-7 [Juglans regia]                                                                                                                                                                                                                                                                                                          |
| MR5G017299.1 | XP_016507994.1//PREDICTED: probable serine/threonine-protein phosphatase 2A regulatory subunit B" subunit TON2 [Nicotiana tabacum];XP_021607790.1//probable serine/threonine-protein phosphatase 2A regulatory subunit B" subunit TON2 [Manihot esculenta];XP_021679543.1//probable serine/threonine-protein phosphatase 2A regulatory subunit B" subunit TON2 [Hevea brasiliensis] |
| MR7G007720.1 | XP_018855654.1//PREDICTED: survival of motor neuron-related-splicing factor 30 isoform X1 [Juglans regia];XP_018855766.1//PREDICTED: survival of motor neuron-related-splicing factor 30 isoform X3 [Juglans regia]                                                                                                                                                                 |
| MR5G017371.1 | XP_018838973.1//PREDICTED: uncharacterized protein LOC109004757 [Juglans regia]                                                                                                                                                                                                                                                                                                     |
| MR7G016767.2 | AFY26894.1//RNA-binding protein with multiple splicing [Morella rubra]                                                                                                                                                                                                                                                                                                              |
| MR7G000834.1 | XP_010044743.1//PREDICTED: 60S ribosomal protein L34 [Eucalyptus grandis]                                                                                                                                                                                                                                                                                                           |
| MR7G004995.1 | XP_018857675.1//PREDICTED: PITH domain-containing protein At3g04780-like, partial [Juglans regia];XP_012089246.1//PITH domain-containing protein At3g04780 [Jatropha curcas];GAV90642.1//PITH domain-containing protein [Cephalotus follicularis]                                                                                                                                   |
| MR8G010060.1 | XP_018828531.1//PREDICTED: exocyst complex component EXO70B1-like [Juglans regia]                                                                                                                                                                                                                                                                                                   |
| MR8G011210.1 | XP_021659332.1//V-type proton ATPase 16 kDa proteolipid subunit [Hevea brasiliensis];KJB17312.1//hypothetical protein B456_003G010900 [Gossypium raimondii]                                                                                                                                                                                                                         |
| MR8G018182.3 | XP_018816462.1//PREDICTED: protein transport protein Sec24-like At3g07100 [Juglans regia];XP_018857395.1//PREDICTED: protein transport protein Sec24-like At3g07100 [Juglans regia]                                                                                                                                                                                                 |
| MR7G008145.3 | XP_018851016.1//PREDICTED: protein TIC 40, chloroplastic-like [Juglans regia]                                                                                                                                                                                                                                                                                                       |
| MR8G020751.1 | XP_018851434.1//PREDICTED: transcription factor bHLH106-like isoform X3 [Juglans regia]                                                                                                                                                                                                                                                                                             |
| MR8G020766.1 | XP_018812759.1//PREDICTED: uncharacterized protein LOC108985063 isoform X1 [Juglans regia];XP_018812757.1//PREDICTED: pentatricopeptide repeat-containing protein At5g18475 isoform X1 [Juglans regia]                                                                                                                                                                              |
| MR5G020302.1 | XP_018844084.1//PREDICTED: uncharacterized protein LOC109008446 isoform X2 [Juglans regia]                                                                                                                                                                                                                                                                                          |

|                     |                                                                                                                                                                                               |
|---------------------|-----------------------------------------------------------------------------------------------------------------------------------------------------------------------------------------------|
| MR5G021736.1        | XP_018849298.1//PREDICTED: E3 ubiquitin-protein ligase RING1-like [Juglans regia]                                                                                                             |
| MR6G007202.1        | XP_018846418.1//PREDICTED: acid phosphatase 1-like [Juglans regia]                                                                                                                            |
| MR0G005280.1        | XP_018809258.1//PREDICTED: uncharacterized protein LOC108982363 [Juglans regia];XP_018848469.1//PREDICTED: fatty acid hydroperoxide lyase, chloroplastic [Juglans regia]                      |
| MR0G001497.1        | XP_019176544.1//PREDICTED: putative 4-hydroxy-4-methyl-2-oxoglutarate aldolase 2 [Ipomoea nil]                                                                                                |
| MR7G012054.1        | XP_018849558.1//PREDICTED: V-type proton ATPase subunit H-like [Juglans regia];XP_021816170.1//V-type proton ATPase subunit H [Prunus avium]                                                  |
| MR7G022891.1        | XP_018823837.1//PREDICTED: eukaryotic translation initiation factor 4B3 [Juglans regia]                                                                                                       |
| MR0G004687.1        | XP_018820232.1//PREDICTED: very-long-chain 3-oxoacyl-CoA reductase 1 [Juglans regia]                                                                                                          |
| MR0G027022.1        | XP_018807444.1//PREDICTED: pectin acetyltransferase 12-like isoform X1 [Juglans regia]                                                                                                        |
| MR6G003925.1        | XP_021602735.1//60S ribosomal protein L8 [Manihot esculenta]                                                                                                                                  |
| MR6G006799.1        | XP_018827274.1//PREDICTED: uncharacterized protein LOC108996014 [Juglans regia]                                                                                                               |
| MR0G006220.1        | XP_018831272.1//PREDICTED: uncharacterized protein LOC108998955 [Juglans regia]                                                                                                               |
| MR0G006609.1        | XP_018834277.1//PREDICTED: nuclear cap-binding protein subunit 2-like [Juglans regia]                                                                                                         |
| MR3G014762.1        | XP_021654626.1//ARF guanine-nucleotide exchange factor GNOM [Hevea brasiliensis];XP_012067704.1//ARF guanine-nucleotide exchange factor GNOM [Jatropha curcas]                                |
| MR7G028821.1        | XP_011045964.1//PREDICTED: beta-galactosidase-like isoform X1 [Populus euphratica];XP_018820458.1//PREDICTED: beta-galactosidase-like isoform X1 [Juglans regia]                              |
| MR6G019729.1        | XP_018840105.1//PREDICTED: leucine-rich repeat receptor-like protein kinase TDR isoform X1 [Juglans regia]                                                                                    |
| MR5G009737.1        | XP_018821067.1//PREDICTED: probable U3 small nucleolar RNA-associated protein 11 isoform X1 [Juglans regia]                                                                                   |
| MR2G024219.1        | XP_018819392.1//PREDICTED: ethanolamine-phosphate cytidylyltransferase [Juglans regia]                                                                                                        |
| MR2G024440.1        | XP_018857901.1//PREDICTED: alpha-galactosidase 1-like [Juglans regia];XP_018837465.1//PREDICTED: uncharacterized protein At5g48480-like [Juglans regia]                                       |
| MR2G024131.1        | XP_018814977.1//PREDICTED: methyltransferase-like protein 5 isoform X1 [Juglans regia]                                                                                                        |
| MR0TCONS_00026066.1 | XP_018834652.1//PREDICTED: putative disease resistance protein At3g14460 isoform X1 [Juglans regia];MR0TCONS_00026066.1//1                                                                    |
| MR5G003464.1        | XP_018815792.1//PREDICTED: MACPF domain-containing protein At4g24290-like [Juglans regia]                                                                                                     |
| MR2G020373.1        | AFK43072.1//unknown [Lotus japonicus]                                                                                                                                                         |
| MR2G022287.1        | XP_018847693.1//PREDICTED: F-box protein SKIP19-like [Juglans regia]                                                                                                                          |
| MR0TCONS_00023638.1 | XP_018835437.1//PREDICTED: putative disease resistance protein At3g14460 isoform X1 [Juglans regia];MR0TCONS_00023638.1//1                                                                    |
| MR0TCONS_00029296.1 | XP_018824162.1//PREDICTED: TMV resistance protein N-like isoform X2 [Juglans regia];MR0TCONS_00029296.1//1;XP_018826968.1//PREDICTED: TMV resistance protein N-like [Juglans regia]           |
| MR2TCONS_00005123.1 | MR2TCONS_00005123.1//1;XP_018839624.1//PREDICTED: probable calcium-binding protein CML49 [Juglans regia]                                                                                      |
| MR3G001245.1        | XP_018820939.1//PREDICTED: 60S ribosomal protein L14-1 [Juglans regia]                                                                                                                        |
| MR5G003617.1        | XP_018822624.1//PREDICTED: uncharacterized protein LOC108992488 [Juglans regia]                                                                                                               |
| MR1G014018.1        | XP_018817532.1//PREDICTED: ubiquitin carboxyl-terminal hydrolase 24 isoform X2 [Juglans regia];XP_018817528.1//PREDICTED: ubiquitin carboxyl-terminal hydrolase 24 isoform X1 [Juglans regia] |
| MR5G025810.1        | XP_002264828.1//PREDICTED: proteasome subunit beta type-5 [Vitis vinifera]                                                                                                                    |
| MR3G002725.1        | XP_021828543.1//putative F-box protein At3g16210 [Prunus avium]                                                                                                                               |

|                     |                                                                                                                                                                                                                                                                                         |
|---------------------|-----------------------------------------------------------------------------------------------------------------------------------------------------------------------------------------------------------------------------------------------------------------------------------------|
| MR3G006431.1        | P83304.1//RecName: Full=Mannose/glucose-specific lectin                                                                                                                                                                                                                                 |
| MR2G024060.1        | XP_018828037.1//PREDICTED: chaperone protein dnaJ 11, chloroplastic-like [Juglans regia]                                                                                                                                                                                                |
| MR2G024087.2        | XP_018850930.1//PREDICTED: peptidyl-tRNA hydrolase 2, mitochondrial-like [Juglans regia]                                                                                                                                                                                                |
| MR5G017201.1        | XP_018825743.1//PREDICTED: multiple organellar RNA editing factor 3, mitochondrial-like [Juglans regia]                                                                                                                                                                                 |
| MR5G003222.1        | XP_007051874.1//PREDICTED: phosphomannomutase [Theobroma cacao]                                                                                                                                                                                                                         |
| MR5G003457.1        | XP_018831435.1//PREDICTED: uncharacterized protein LOC108999088 [Juglans regia]                                                                                                                                                                                                         |
| MR1G003952.1        | XP_018828488.1//PREDICTED: uncharacterized protein At5g39865-like isoform X2 [Juglans regia]                                                                                                                                                                                            |
| MR1G012147.1        | XP_018850034.1//PREDICTED: 60S ribosomal protein L22-3-like [Juglans regia]                                                                                                                                                                                                             |
| MR3G014724.1        | XP_010108756.1//AP3-complex subunit beta-A [Morus notabilis];XP_018814465.1//PREDICTED: AP3-complex subunit beta-A [Juglans regia]                                                                                                                                                      |
| MR8G019278.2        | XP_018837044.1//PREDICTED: probable cytosolic oligopeptidase A [Juglans regia];XP_018850785.1//PREDICTED: probable cytosolic oligopeptidase A [Juglans regia]                                                                                                                           |
| MR8G019517.1        | XP_021294583.1//glycine--tRNA ligase, mitochondrial 1 [Herrania umbratica];XP_018829229.1//PREDICTED: glycine--tRNA ligase, mitochondrial 1-like [Juglans regia]                                                                                                                        |
| MR1G003946.1        | XP_018828488.1//PREDICTED: uncharacterized protein At5g39865-like isoform X2 [Juglans regia]                                                                                                                                                                                            |
| MR1G008473.1        | XP_018818443.1//PREDICTED: cytochrome P450 734A5-like isoform X1 [Juglans regia]                                                                                                                                                                                                        |
| MR7G028038.2        | XP_021593499.1//putative receptor-like protein kinase At4g00960 [Manihot esculenta];XP_018837849.1//PREDICTED: putative receptor-like protein kinase At4g00960 [Juglans regia];XP_015895441.1//PREDICTED: putative receptor-like protein kinase At4g00960 [Ziziphus jujuba]             |
| MR1G019332.1        | XP_018847023.1//PREDICTED: zinc finger CCCH domain-containing protein 19-like [Juglans regia];AAX33674.1//plus agglutinin, partial [Chlamydomonas incerta];XP_015892420.1//PREDICTED: zinc finger CCCH domain-containing protein 19 [Ziziphus jujuba]                                   |
| MR4G026749.1        | XP_021685894.1//DDR GK domain-containing protein 1-like [Hevea brasiliensis];XP_018824029.1//PREDICTED: DDR GK domain-containing protein 1 [Juglans regia]                                                                                                                              |
| MR4G027358.3        | XP_018823765.1//PREDICTED: uncharacterized protein LOC108993338 [Juglans regia]                                                                                                                                                                                                         |
| MR4TCONS_00016369.1 | XP_018840086.1//PREDICTED: protein DEHYDRATION-INDUCED 19 homolog 6-like [Juglans regia];MR4TCONS_00016369.1//1                                                                                                                                                                         |
| MR7G006051.1        | XP_018815515.1//PREDICTED: spermidine synthase 1-like [Juglans regia]                                                                                                                                                                                                                   |
| MR0TCONS_00037684.1 | XP_018825583.1//PREDICTED: condensin-2 complex subunit H2 isoform X1 [Juglans regia];MR0TCONS_00037684.1//1                                                                                                                                                                             |
| MR1G003944.1        | XP_018819183.1//PREDICTED: ubiquitin-activating enzyme E1 1-like [Juglans regia]                                                                                                                                                                                                        |
| MR3G014650.1        | XP_018831984.1//PREDICTED: actin-depolymerizing factor 2-like [Juglans regia];XP_018814417.1//PREDICTED: pentatricopeptide repeat-containing protein At2g39620 [Juglans regia]                                                                                                          |
| MR1G014145.1        | XP_018819535.1//PREDICTED: WD repeat-containing protein 20-like [Juglans regia]                                                                                                                                                                                                         |
| MR1G015692.1        | XP_018860033.1//PREDICTED: ankyrin repeat-containing protein ITN1-like isoform X1 [Juglans regia];XP_018812140.1//PREDICTED: uncharacterized protein LOC108984585 isoform X1 [Juglans regia];XP_018807238.1//PREDICTED: uncharacterized protein LOC108980690 isoform X1 [Juglans regia] |
| MR1G015702.1        | XP_018851787.1//PREDICTED: uncharacterized protein LOC109013963 [Juglans regia];XP_018846052.1//PREDICTED: uncharacterized protein LOC109009862 [Juglans regia]                                                                                                                         |
| MR4TCONS_00017612.1 | XP_021821504.1//5'-adenylylsulfate reductase 3, chloroplastic-like [Prunus avium];MR4TCONS_00017612.1//1;XP_018811788.1//PREDICTED: dihydrolipoyllysine-residue succinyltransferase component of 2-oxoglutarate dehydrogenase complex 2, mitochondrial-like [Juglans regia]             |
| MR1G020884.1        | XP_006433549.1//hypothetical protein CICLE_v10003144mg [Citrus clementina]                                                                                                                                                                                                              |
| MR1G022529.1        | XP_018818952.1//PREDICTED: probable glucuronoxylan glucuronosyltransferase IRX7 [Juglans regia]                                                                                                                                                                                         |

|                     |                                                                                                                                                                                                                                                                                                     |
|---------------------|-----------------------------------------------------------------------------------------------------------------------------------------------------------------------------------------------------------------------------------------------------------------------------------------------------|
| MR1G027855.1        | ONI29973.1//hypothetical protein PRUPE_1G225000 [Prunus persica];XP_018808222.1//PREDICTED: ranBP2-type zinc finger protein At1g67325-like isoform X2 [Juglans regia]                                                                                                                               |
| MR5G021745.1        | XP_018808387.1//PREDICTED: uncharacterized protein LOC108981612 [Juglans regia]                                                                                                                                                                                                                     |
| MR6G000259.1        | XP_018856599.1//PREDICTED: derlin-1 [Juglans regia];XP_021668993.1//profilin-2 [Hevea brasiliensis]                                                                                                                                                                                                 |
| MR1G020792.1        | XP_018844177.1//PREDICTED: non-functional NADPH-dependent codeinone reductase 2-like isoform X1 [Juglans regia]                                                                                                                                                                                     |
| MR8G001629.2        | XP_018808099.1//PREDICTED: uncharacterized protein LOC108981407 [Juglans regia]                                                                                                                                                                                                                     |
| MR2G006757.1        | XP_018825879.1//PREDICTED: selT-like protein [Juglans regia]                                                                                                                                                                                                                                        |
| MR2G014105.1        | XP_018830864.1//PREDICTED: uncharacterized protein LOC108998669 [Juglans regia]                                                                                                                                                                                                                     |
| MR2G020031.1        | KRG95050.1//hypothetical protein GLYMA_19G126700 [Glycine max];XP_018857670.1//PREDICTED: psbP domain-containing protein 6, chloroplastic [Juglans regia]                                                                                                                                           |
| MR1TCONS_00041911.1 | MR1TCONS_00041911.1//1;XP_009371499.1//PREDICTED: nudC domain-containing protein 2-like [Pyrus x bretschneideri]                                                                                                                                                                                    |
| MR4G028396.1        | XP_021814380.1//long chain base biosynthesis protein 2a [Prunus avium];XP_018832123.1//PREDICTED: long chain base biosynthesis protein 2a [Juglans regia]                                                                                                                                           |
| MR5G000697.1        | XP_018846416.1//PREDICTED: uncharacterized protein LOC109010150 [Juglans regia];XP_018846407.1//PREDICTED: uncharacterized protein LOC109010143 [Juglans regia]                                                                                                                                     |
| MR5G001859.1        | XP_008460096.1//PREDICTED: 50S ribosomal protein L3, chloroplastic [Cucumis melo]                                                                                                                                                                                                                   |
| MR7G010648.1        | XP_018849622.1//PREDICTED: uncharacterized protein LOC109012442 [Juglans regia];XP_018849623.1//PREDICTED: histone acetyltransferase of the MYST family 1-like isoform X1 [Juglans regia];XP_018849624.1//PREDICTED: histone acetyltransferase of the MYST family 2-like isoform X2 [Juglans regia] |
| MR1G029232.1        | XP_018828598.1//PREDICTED: probable phyto kinase 3, chloroplastic [Juglans regia];XP_007205802.2//probable phyto kinase 3, chloroplastic [Prunus persica]                                                                                                                                           |
| MR1TCONS_00065258.1 | MR1TCONS_00065258.1//1;XP_018812980.1//PREDICTED: copper transporter 1-like [Juglans regia]                                                                                                                                                                                                         |
| MR1G017405.1        | XP_018839745.1//PREDICTED: RNA-binding protein 8A-like [Juglans regia]                                                                                                                                                                                                                              |
| MR3G015834.1        | XP_021285398.1//protein LIKE COV 1-like [Herrania umbratica];XP_018826705.1//PREDICTED: glucan endo-1,3-beta-D-glucosidase-like [Juglans regia];OIW03484.1//hypothetical protein TanjilG_14709 [Lupinus angustifolius]                                                                              |
| MR4G021335.1        | XP_018825050.1//PREDICTED: 2-oxoglutarate-Fe(II) type oxidoreductase-like isoform X2 [Juglans regia];XP_018819252.1//PREDICTED: E3 ubiquitin-protein ligase HOS1-like isoform X2 [Juglans regia];XP_018819251.1//PREDICTED: E3 ubiquitin-protein ligase HOS1-like isoform X1 [Juglans regia]        |
| MR2G011234.3        | XP_018849879.1//PREDICTED: GDSL esterase/lipase At5g45920-like [Juglans regia]                                                                                                                                                                                                                      |
| MR4G024734.1        | XP_018824266.1//PREDICTED: uncharacterized protein LOC108993715 [Juglans regia]                                                                                                                                                                                                                     |
| MR4G025266.1        | XP_018852532.1//PREDICTED: BTB/POZ domain-containing protein At1g63850-like [Juglans regia]                                                                                                                                                                                                         |
| MR4G025779.1        | XP_018842158.1//PREDICTED: probable splicing factor 3A subunit 1 isoform X1 [Juglans regia]                                                                                                                                                                                                         |
| MR4G023328.1        | XP_018858684.1//PREDICTED: uncharacterized protein LOC109020632 [Juglans regia]                                                                                                                                                                                                                     |
| MR1TCONS_00025928.1 | MR1TCONS_00025928.1//1;KCW50716.1//hypothetical protein EUGRSUZ_J00392, partial [Eucalyptus grandis]                                                                                                                                                                                                |
| MR2G006156.1        | XP_003630811.1//trafficking protein particle complex subunit-like protein [Medicago truncatula];XP_012486075.1//PREDICTED: trafficking protein particle complex subunit 4 isoform X1 [Gossypium raimondii]                                                                                          |
| MR3G026361.1        | XP_018811100.1//PREDICTED: GDSL esterase/lipase APG-like [Juglans regia]                                                                                                                                                                                                                            |
| MR3G026562.1        | XP_018823521.1//PREDICTED: uncharacterized protein At1g04910-like isoform X1 [Juglans regia];XP_020088947.1//uncharacterized protein At1g04910 isoform X2 [Ananas comosus];XP_018823520.1//PREDICTED: pentatricopeptide repeat-containing protein At1g52640, mitochondrial [Juglans regia]          |
| MR1G028362.1        | XP_018825704.1//PREDICTED: uncharacterized protein LOC108994797 [Juglans regia]                                                                                                                                                                                                                     |

|                     |                                                                                                                                                                                                                                           |
|---------------------|-------------------------------------------------------------------------------------------------------------------------------------------------------------------------------------------------------------------------------------------|
| MR1G029339.2        | XP_018847278.1//PREDICTED: anaphase-promoting complex subunit 13 [Juglans regia];XP_020422273.1//ABC transporter G family member 11 [Prunus persica]                                                                                      |
| MR0G003971.1        | KDO45995.1//hypothetical protein CISIN_1g002232mg [Citrus sinensis];XP_018834046.1//PREDICTED: uncharacterized protein LOC109001286 [Juglans regia]                                                                                       |
| MR3G015801.1        | XP_018821636.1//PREDICTED: arabinosyltransferase RRA3-like [Juglans regia]                                                                                                                                                                |
| MR4G022364.1        | XP_018846398.1//PREDICTED: protein SEH1 [Juglans regia]                                                                                                                                                                                   |
| MR4G023063.1        | XP_018824245.1//PREDICTED: acyl-coenzyme A oxidase 3, peroxisomal-like [Juglans regia]                                                                                                                                                    |
| MR4G007135.1        | XP_018850746.1//PREDICTED: uncharacterized protein LOC109013191 isoform X2 [Juglans regia]                                                                                                                                                |
| MR4G021049.1        | XP_018833326.1//PREDICTED: protein-L-isoaspartate O-methyltransferase 1-like [Juglans regia]                                                                                                                                              |
| MR2G001814.1        | XP_018817193.1//PREDICTED: ganglioside-induced differentiation-associated protein 2 [Juglans regia]                                                                                                                                       |
| MR4G018534.1        | XP_018825601.1//PREDICTED: phosphatidylinositol/phosphatidylcholine transfer protein SFH9-like isoform X1 [Juglans regia];GAV59666.1//CRAL_TRIO domain-containing protein/CRAL_TRIO_N domain-containing protein [Cephalotus follicularis] |
| MR3TCONS_00012160.1 | MR3TCONS_00012160.1//1;XP_010273654.1//PREDICTED: mannose/glucose-specific lectin-like [Nelumbo nucifera]                                                                                                                                 |
| MR4G021219.4        | XP_018847688.1//PREDICTED: SNARE-interacting protein KEULE isoform X2 [Juglans regia];XP_018847679.1//PREDICTED: SNARE-interacting protein KEULE isoform X1 [Juglans regia]                                                               |
| MR3G026615.1        | XP_018839930.1//PREDICTED: pyrophosphate-energized vacuolar membrane proton pump [Juglans regia]                                                                                                                                          |
| MR4G001427.1        | XP_018812266.1//PREDICTED: transcription initiation factor TFIID subunit 6-like [Juglans regia]                                                                                                                                           |
| MR4G002293.2        | XP_018815569.1//PREDICTED: putative E3 ubiquitin-protein ligase UBR7 [Juglans regia]                                                                                                                                                      |
| MR4G012554.1        | XP_018828872.1//PREDICTED: protein P21-like [Juglans regia]                                                                                                                                                                               |
| MR4G016029.1        | XP_006370463.1//hypothetical protein POPTR_0001s42940g [Populus trichocarpa];XP_018827406.1//PREDICTED: uncharacterized protein LOC108996090 [Juglans regia]                                                                              |
| MR7G016748.1        | XP_018824697.1//PREDICTED: protein phosphatase 2C 57 [Juglans regia]                                                                                                                                                                      |
| MR7G024824.1        | XP_018844398.1//PREDICTED: two-component response regulator ARR5-like [Juglans regia]                                                                                                                                                     |

---



**Table S15.** Annotation of genes in dark-cyan module.

| Gene ID      | Nr annotation                                                                                                                                                                                                       |
|--------------|---------------------------------------------------------------------------------------------------------------------------------------------------------------------------------------------------------------------|
| MR1G019545.1 | XP_018806529.1//PREDICTED: ethylene receptor [Juglans regia]                                                                                                                                                        |
| MR7G007524.1 | XP_018824793.1//PREDICTED: ethylene-responsive transcription factor 1-like [Juglans regia]                                                                                                                          |
| MR3G008361.1 | XP_018814221.1//PREDICTED: 1-aminocyclopropane-1-carboxylate oxidase homolog 1-like [Juglans regia];XP_015887927.1//PREDICTED: 1-aminocyclopropane-1-carboxylate oxidase homolog 1-like [Ziziphus jujuba]           |
| MR8G001578.1 | XP_018843080.1//PREDICTED: squamosa promoter-binding-like protein 14 [Juglans regia]                                                                                                                                |
| MR7G011514.1 | XP_018807978.1//PREDICTED: B3 domain-containing transcription factor VRN1-like isoform X1 [Juglans regia];XP_018807979.1//PREDICTED: B3 domain-containing transcription factor VRN1-like isoform X2 [Juglans regia] |
| MR8G010076.1 | XP_018828595.1//PREDICTED: UDP-glycosyltransferase 87A1-like [Juglans regia]                                                                                                                                        |
| MR6G011287.1 | XP_018827349.1//PREDICTED: auxin-induced protein 22D-like isoform X2 [Juglans regia];XP_018827348.1//PREDICTED: auxin-induced protein 22D-like isoform X1 [Juglans regia]                                           |
| MR8G002775.1 | XP_007017801.1//PREDICTED: gibberellin-regulated protein 1 [Theobroma cacao]                                                                                                                                        |
| MR7G000279.1 | XP_018817886.1//PREDICTED: shaggy-related protein kinase kappa-like [Juglans regia]                                                                                                                                 |
| MR4G023618.1 | XP_017973938.1//PREDICTED: zinc finger CCCH domain-containing protein 12 [Theobroma cacao]                                                                                                                          |
| MR7G000837.1 | XP_018832014.1//PREDICTED: zinc-finger homeodomain protein 11-like [Juglans regia]                                                                                                                                  |
| MR7G023875.1 | XP_018832014.1//PREDICTED: zinc-finger homeodomain protein 11-like [Juglans regia]                                                                                                                                  |
| MR2G024066.1 | XP_018805348.1//PREDICTED: protein PHR1-LIKE 2-like isoform X1 [Juglans regia]                                                                                                                                      |
| MR3G015757.1 | XP_018857297.1//PREDICTED: cytochrome P450 CYP82D47-like [Juglans regia]                                                                                                                                            |
| MR6G011265.1 | XP_015891497.1//PREDICTED: light-inducible protein CPRF2 isoform X1 [Ziziphus jujuba]                                                                                                                               |
| MR6G021640.1 | XP_018815487.1//PREDICTED: allene oxide cyclase, chloroplastic-like [Juglans regia]                                                                                                                                 |
| MR3G015734.1 | XP_018846613.1//PREDICTED: cytochrome P450 CYP82D47-like [Juglans regia]                                                                                                                                            |
| MR2G018522.5 | XP_018859835.1//PREDICTED: uncharacterized protein LOC109021631 isoform X1 [Juglans regia];XP_018818511.1//PREDICTED: beta-glucosidase 40-like [Juglans regia]                                                      |
| MR8G020754.1 | XP_018851428.1//PREDICTED: AT-hook motif nuclear-localized protein 17-like [Juglans regia]                                                                                                                          |
| MR8G019531.1 | XP_018831523.1//PREDICTED: uncharacterized protein LOC108999173 [Juglans regia]                                                                                                                                     |
| MR8G022192.1 | XP_018845274.1//PREDICTED: probable nucleolar protein 5-2 [Juglans regia]                                                                                                                                           |
| MR0G008817.1 | XP_018846820.1//PREDICTED: GDSL esterase/lipase EXL3-like [Juglans regia];XP_018847896.1//PREDICTED: GDSL esterase/lipase EXL3-like [Juglans regia]                                                                 |
| MR0G005287.1 | XP_002273297.1//PREDICTED: uncharacterized protein LOC100246609 [Vitis vinifera];XP_018810077.1//PREDICTED: ubiquitin fusion degradation protein 1 [Juglans regia]                                                  |
| MR0G007264.1 | XP_018834537.1//PREDICTED: LOW QUALITY PROTEIN: uncharacterized protein LOC109001639 [Juglans regia];XP_018860339.1//PREDICTED: monoacylglycerol lipase abhd6-A-like [Juglans regia]                                |
| MR8G012690.1 | XP_018822243.1//PREDICTED: RNA-dependent RNA polymerase 6 [Juglans regia]                                                                                                                                           |
| MR8G002765.1 | XP_018857921.1//PREDICTED: tRNA (adenine(58)-N(1))-methyltransferase non-catalytic subunit trm6 isoform X2 [Juglans regia]                                                                                          |
| MR8G028462.1 | XP_018814811.1//PREDICTED: ras-related protein RABA3 [Juglans regia]                                                                                                                                                |

MR8G000678.2 EOY15140.1//Major facilitator superfamily protein isoform 1 [Theobroma cacao];XP\_018807630.1//PREDICTED: phospholipase D delta-like [Juglans regia]

MR8G012676.1 XP\_018822222.1//PREDICTED: DEAD-box ATP-dependent RNA helicase 56 [Juglans regia]

MR8G020746.1 XP\_018851444.1//PREDICTED: probable ubiquitin-like-specific protease 2B [Juglans regia]

MR8G003125.1 XP\_018814681.1//PREDICTED: uncharacterized protein LOC108986499 [Juglans regia];XP\_013467208.1//50S ribosomal L24-like protein [Medicago truncatula]

MR8G001577.1 XP\_018832979.1//PREDICTED: calponin homology domain-containing protein DDB\_G0272472-like [Juglans regia]

MR8G019130.1 XP\_018815217.1//PREDICTED: mediator of RNA polymerase II transcription subunit 28-like [Juglans regia]

MR8G002789.1 GAV88627.1//Tubulin domain-containing protein/Tubulin\_C domain-containing protein [Cephalotus follicularis];KHG21743.1//Tubulin beta-6 chain [Gossypium arboreum]

MR0G013397.1 XP\_018837122.1//PREDICTED: putative wall-associated receptor kinase-like 16 isoform X2 [Juglans regia];XP\_018837121.1//PREDICTED: putative wall-associated receptor kinase-like 16 isoform X1 [Juglans regia]

MR0G007917.1 XP\_018816202.1//PREDICTED: heterogeneous nuclear ribonucleoprotein H3 [Juglans regia]

MR0G005135.1 XP\_018811673.1//PREDICTED: polypyrimidine tract-binding protein homolog 3 [Juglans regia]

MR0G002914.1 XP\_018827844.1//PREDICTED: UPF0481 protein At3g47200-like [Juglans regia]

MR7G014376.1 XP\_018815945.1//PREDICTED: cyclic nucleotide-gated ion channel 1-like [Juglans regia];XP\_018817070.1//PREDICTED: cyclic nucleotide-gated ion channel 1-like [Juglans regia]

MR8G016813.1 XP\_018852473.1//PREDICTED: AT-hook motif nuclear-localized protein 5-like [Juglans regia]

MR8G003345.1 XP\_007017641.1//PREDICTED: probable ubiquitin-conjugating enzyme E2 18 [Theobroma cacao];XP\_021636594.1//probable ubiquitin-conjugating enzyme E2 18 isoform X2 [Hevea brasiliensis]

MR8G012788.1 XP\_018848154.1//PREDICTED: thioredoxin Y1, chloroplastic-like [Juglans regia]

MR7G022720.1 XP\_018827476.1//PREDICTED: uncharacterized protein LOC108996170 isoform X1 [Juglans regia];XP\_018827760.1//PREDICTED: uncharacterized protein LOC108996356 isoform X3 [Juglans regia];XP\_018827477.1//PREDICTED: uncharacterized protein LOC108996170 isoform X2 [Juglans regia]

MR8G007621.1 XP\_018835920.1//PREDICTED: cysteine desulfurase, mitochondrial [Juglans regia]

MR7G024817.1 XP\_018823789.1//PREDICTED: uncharacterized protein LOC108993357 [Juglans regia];XP\_018841531.1//PREDICTED: metal-independent phosphoserine phosphatase-like [Juglans regia];XP\_018809737.1//PREDICTED: uncharacterized protein LOC108982736 [Juglans regia]

MR8G011180.1 XP\_018809682.1//PREDICTED: 3-ketoacyl-CoA thiolase 2, peroxisomal-like [Juglans regia];XP\_018817260.1//PREDICTED: 3-ketoacyl-CoA thiolase 2, peroxisomal [Juglans regia]

MR8TCONS\_00054106.1 XP\_018845568.1//PREDICTED: rhomboid-like protein 11, chloroplastic isoform X1 [Juglans regia];MR8TCONS\_00054106.1//1;XP\_006450616.1//hypothetical protein CICLE\_v10008742mg [Citrus clementina]

MR7G011363.5 XP\_018835517.1//PREDICTED: importin-4 [Juglans regia]

MR7G011362.2 XP\_018842055.1//PREDICTED: uncharacterized protein LOC109007028 [Juglans regia]

MR8G011209.1 XP\_018821156.1//PREDICTED: probable 1-acylglycerol-3-phosphate O-acyltransferase [Juglans regia]

MR7G007526.1 XP\_018824789.1//PREDICTED: 60S ribosomal protein L19-3 isoform X1 [Juglans regia]

MR7G016747.1 XP\_018824595.1//PREDICTED: protein PLASTID TRANSCRIPTIONALLY ACTIVE 7 isoform X2 [Juglans regia];XP\_018824594.1//PREDICTED: protein PLASTID TRANSCRIPTIONALLY ACTIVE 7 isoform X1 [Juglans regia]

MR7G016713.1 XP\_018835879.1//PREDICTED: probable pectinesterase/pectinesterase inhibitor 61 [Juglans regia]

MR8G012742.1 XP\_018822278.1//PREDICTED: uncharacterized protein LOC108992239 [Juglans regia]

MR0G014428.1 XP\_018810780.1//PREDICTED: rust resistance kinase Lr10-like [Juglans regia];XP\_018848214.1//PREDICTED: rust resistance kinase Lr10-like [Juglans regia]

MR0G007424.1 XP\_018807955.1//PREDICTED: uncharacterized protein LOC108981294 isoform X2 [Juglans regia]

MR0G027783.1 CAN66161.1//hypothetical protein VITISV\_008123 [Vitis vinifera];XP\_010277194.1//PREDICTED: V-type proton ATPase catalytic subunit A [Nelumbo nucifera]

MR8G011203.1 XP\_018809066.1//PREDICTED: protein LTV1 homolog isoform X1 [Juglans regia]

MR0G024306.1 XP\_018826762.1//PREDICTED: LOW QUALITY PROTEIN: CBL-interacting serine/threonine-protein kinase 24-like [Juglans regia]

MR6G022644.1 XP\_018821485.1//PREDICTED: CLAVATA3/ESR (CLE)-related protein 41-like [Juglans regia]

MR6G025256.1 XP\_018848480.1//PREDICTED: endoglucanase 11-like isoform X1 [Juglans regia]

MR0G005900.1 XP\_018856092.1//PREDICTED: cyclic nucleotide-gated ion channel 1-like, partial [Juglans regia]  
XP\_014622642.1//PREDICTED: isocitrate dehydrogenase [NADP] [Glycine max];XP\_011014473.1//PREDICTED: isocitrate dehydrogenase [NADP] isoform X2 [Populus euphratica];EOY02462.1//Isocitrate/isopropylmalate dehydrogenase family protein isoform 4 [Theobroma cacao];XP\_018830447.1//PREDICTED: isocitrate dehydrogenase [NADP]-like [Juglans regia];XP\_011014465.1//PREDICTED: isocitrate dehydrogenase [NADP] isoform X1 [Populus euphratica]

MR0G007649.1 XP\_018852998.1//PREDICTED: 60S acidic ribosomal protein P3-like [Juglans regia]

MR0G007648.1 XP\_018852998.1//PREDICTED: 60S acidic ribosomal protein P3-like [Juglans regia]  
XP\_018809141.1//PREDICTED: protein disulfide-isomerase SCO2-like isoform X1 [Juglans regia];OMO63235.1//hypothetical protein COLO4\_32660 [Corchorus olitorius];XP\_018809147.1//PREDICTED: probable LRR receptor-like serine/threonine-protein kinase Atlg67720 isoform X1 [Juglans regia]

MR8G000662.1 XP\_018851775.1//PREDICTED: ribonuclease P protein subunit p25-like protein [Juglans regia]

MR8G001590.1 XP\_018843096.1//PREDICTED: uncharacterized protein LOC109007741 [Juglans regia];XP\_018832963.1//PREDICTED: uncharacterized protein LOC109000515 [Juglans regia]

MR8G001596.1 ACJ38667.1//cellulose synthase [Betula luminifera];XP\_018832959.1//PREDICTED: probable cellulose synthase A catalytic subunit 3 [UDP-forming] [Juglans regia]

MR0G025665.1 XP\_011019066.1//PREDICTED: uncharacterized protein LOC105121905 isoform X1 [Populus euphratica]

MR8G004551.1 XP\_018844209.1//PREDICTED: uncharacterized protein LOC109008540 [Juglans regia]

MR6G013325.1 XP\_018845402.1//PREDICTED: acyl-coenzyme A oxidase 2, peroxisomal [Juglans regia]

MR7G014911.1 XP\_006486653.1//PREDICTED: coiled-coil domain-containing protein 124 [Citrus sinensis]  
XP\_018841763.1//PREDICTED: GDSL esterase/lipase Atlg54790 isoform X3 [Juglans regia];XP\_018841762.1//PREDICTED: GDSL esterase/lipase Atlg54790 isoform X2 [Juglans regia];OIV95120.1//hypothetical protein TanjilG\_21510 [Lupinus angustifolius]

MR8G008686.2

MR7G002562.1 XP\_018834258.1//PREDICTED: uncharacterized protein LOC109001432 [Juglans regia]

MR0G013904.1 XP\_012854681.1//PREDICTED: tubulin alpha-3 chain-like [Erythranthe guttata];XP\_002532068.1//PREDICTED: tubulin alpha-3 chain [Ricinus communis]

MR8G022070.1 XP\_018854753.1//PREDICTED: phytochrome A-associated F-box protein-like [Juglans regia]

MR8G006636.1 XP\_018843143.1//PREDICTED: uncharacterized protein LOC109007768 [Juglans regia]

MR8G027828.1 XP\_018843670.1//PREDICTED: probable E3 ubiquitin-protein ligase RHC1A [Juglans regia]

MR0G013882.1 XP\_018846455.1//PREDICTED: uncharacterized protein LOC109010170 isoform X2 [Juglans regia]

MR7G014360.1 XP\_018810725.1//PREDICTED: CWF19-like protein 2 isoform X1 [Juglans regia]

MR8G000663.1 XP\_018808145.1//PREDICTED: uncharacterized protein LOC108981433 isoform X2 [Juglans regia]

MR7G011549.1 XP\_018858124.1//PREDICTED: probable 1-acyl-sn-glycerol-3-phosphate acyltransferase 5 isoform X1 [Juglans regia]

MR7G012077.1 EMT29211.1//Tocopherol O-methyltransferase, chloroplastic [Aegilops tauschii];XP\_018837640.1//PREDICTED: probable tocopherol O-methyltransferase, chloroplastic isoform X4 [Juglans regia]

MR7G022721.1 XP\_018851259.1//PREDICTED: DNA-directed RNA polymerases II, IV and V subunit 3-like [Juglans regia]

MR7G024245.1 XP\_018805220.1//PREDICTED: signal recognition particle receptor subunit beta-like [Juglans regia]

MR6G029291.1 XP\_018852174.1//PREDICTED: probable methyltransferase PMT21 [Juglans regia]

MR0G005136.1 XP\_018848151.1//PREDICTED: uncharacterized protein LOC109011402 isoform X8 [Juglans regia];XP\_018811676.1//PREDICTED: cold and drought-regulated protein CORA-like [Juglans regia]

MR4G026972.1 XP\_018856812.1//PREDICTED: E3 ubiquitin-protein ligase RNF14 [Juglans regia]

MR7G028535.1 XP\_012066736.1//40S ribosomal protein S16 [Jatropha curcas]

MR7G012055.1 XP\_018849553.1//PREDICTED: uncharacterized protein LOC109012398 [Juglans regia]

MR5TCONS\_00034061.1 XP\_018817376.1//PREDICTED: uncharacterized protein LOC108988545 isoform X1 [Juglans regia];MR5TCONS\_00034061.1//1;XP\_018860419.1//PREDICTED: uncharacterized protein LOC109022075 isoform X3 [Juglans regia]

MR7G014900.1 OVA16003.1//Organic solute transporter Ost-alpha [Macleaya cordata]

MR5G010171.1 XP\_018833680.1//PREDICTED: uncharacterized protein LOC109001019 [Juglans regia];XP\_018815898.1//PREDICTED: uncharacterized protein LOC108987432 [Juglans regia]

MR0G007880.1 XP\_018846040.1//PREDICTED: protein translocase subunit SECA2, chloroplastic isoform X2 [Juglans regia]

MR8G011218.1 KQL09126.1//hypothetical protein SETIT\_007379mg [Setaria italica];KOM49126.1//hypothetical protein LR48\_Vigan07g283000 [Vigna angularis];KQL30138.1//hypothetical protein SETIT\_018284mg [Setaria italica]

MR4G006774.1 XP\_018837952.1//PREDICTED: cyclin-dependent kinase F-4-like [Juglans regia];XP\_018852179.1//PREDICTED: cyclin-dependent kinase F-4-like isoform X1 [Juglans regia]

MR4G009043.1 XP\_018859956.1//PREDICTED: UPF0160 protein C27H6.8-like [Juglans regia]

MR7TCONS\_00020974.1 XP\_018817103.1//PREDICTED: long chain acyl-CoA synthetase 9, chloroplastic [Juglans regia];MR7TCONS\_00020974.1//1

MR4G014243.1 XP\_018831294.1//PREDICTED: ALA-interacting subunit 3 [Juglans regia];XP\_021691142.1//ALA-interacting subunit 3-like [Hevea brasiliensis]

MR4G015995.1 XP\_018819594.1//PREDICTED: uncharacterized protein LOC108990167 [Juglans regia]

MR4G009044.1 XP\_018859956.1//PREDICTED: UPF0160 protein C27H6.8-like [Juglans regia]

MR4G021010.1 XP\_018814785.1//PREDICTED: protein PLASTID TRANSCRIPTIONALLY ACTIVE 10 [Juglans regia]

MR4G016473.3 XP\_018860751.1//PREDICTED: uncharacterized protein LOC109022330 isoform X2 [Juglans regia]

MR5G024989.2 XP\_018820305.1//PREDICTED: uracil-DNA glycosylase, mitochondrial isoform X2 [Juglans regia]

MR5G024525.1 XP\_018860442.1//PREDICTED: adenylyl-sulfate kinase 3-like isoform X1 [Juglans regia]

MR5G017247.1 XP\_018810246.1//PREDICTED: kinesin-like protein KIN-13A [Juglans regia]

MR5G018745.1 XP\_018858205.1//PREDICTED: lysine-rich arabinogalactan protein 18-like [Juglans regia]

MR4G021196.1 XP\_018847370.1//PREDICTED: uncharacterized protein LOC109010875 [Juglans regia]

MR8G002087.1 XP\_018835291.1//PREDICTED: protein IWS1 homolog 2-like [Juglans regia]

MR8G028457.1 XP\_018847437.1//PREDICTED: BTB/POZ and MATH domain-containing protein 2-like [Juglans regia];XP\_010652109.1//PREDICTED: BTB/POZ and MATH domain-containing protein 2 [Vitis vinifera]

MR6G005848.1 EOX93041.1//DEAD-box ATP-dependent RNA helicase 53 isoform 3 [Theobroma cacao];XP\_018843891.1//PREDICTED: DEAD-box ATP-dependent RNA helicase 53-like [Juglans regia]

MR4G008724.1 XP\_018827500.1//PREDICTED: acetolactate synthase 2, chloroplastic [Juglans regia]

MR8G016250.3 XP\_018832755.1//PREDICTED: putative GPI-anchor transamidase [Juglans regia]

MR7G007479.1 XP\_018817813.1//PREDICTED: uncharacterized protein LOC108988884 [Juglans regia]

MR6G010863.1 XP\_018844721.1//PREDICTED: probable gamma-secretase subunit PEN-2 [Juglans regia]

MR4G021019.1 XP\_007209234.1//26S proteasome non-ATPase regulatory subunit 6 homolog [Prunus persica]

MR3G021766.1 XP\_008225280.1//PREDICTED: protein YLS3-like [Prunus mume];XP\_012476463.1//PREDICTED: BAG family molecular chaperone regulator 4-like isoform X2 [Gossypium raimondii];XP\_015874580.1//PREDICTED: BAG family molecular chaperone regulator 4-like [Ziziphus jujuba]

MR0G024320.1 XP\_018822164.1//PREDICTED: protein NETWORKED 3A-like isoform X3 [Juglans regia];XP\_018822162.1//PREDICTED: protein NETWORKED 3C-like isoform X1 [Juglans regia]

MR6G007208.1 CBI27972.3//unnamed protein product, partial [Vitis vinifera]

MR4G028681.1 XP\_018806918.1//PREDICTED: MND1-interacting protein 1-like [Juglans regia];XP\_018824663.1//PREDICTED: MND1-interacting protein 1 [Juglans regia]

MR4G023611.1 XP\_018805178.1//PREDICTED: RNA-binding protein 34 [Juglans regia]

MR8G023194.1 XP\_018856502.1//PREDICTED: peptidyl-prolyl cis-trans isomerase CYP63 isoform X1 [Juglans regia];AJA29688.1//peptidyl-prolyl cis-trans isomerase [Betula luminifera]

MR5G003500.1 XP\_018815791.1//PREDICTED: probably inactive leucine-rich repeat receptor-like protein kinase At3g28040 [Juglans regia]

MR7G000283.1 XP\_007041211.1//PREDICTED: uncharacterized protein LOC18607136 [Theobroma cacao]

MR0G013881.1 XP\_018850833.1//PREDICTED: aspartic proteinase-like protein 1 isoform X1 [Juglans regia]

MR7G017822.1 XP\_002284010.1//PREDICTED: uncharacterized protein LOC100262828 [Vitis vinifera]

MR8G000679.2 XP\_018807630.1//PREDICTED: phospholipase D delta-like [Juglans regia];GAV56681.1//C2 domain-containing protein/PLDc domain-containing protein/PLD\_C domain-containing protein/PLDc\_2 domain-containing protein [Cephalotus follicularis]

MR8G003357.1 XP\_018843843.1//PREDICTED: protein WALLS ARE THIN 1-like [Juglans regia];XP\_018821147.1//PREDICTED: protein WALLS ARE THIN 1-like [Juglans regia]

MR8G012787.1 XP\_018851917.1//PREDICTED: uncharacterized protein LOC109014067 isoform X1 [Juglans regia]

MR8G024955.1 XP\_018840959.1//PREDICTED: lipid phosphate phosphatase gamma, chloroplastic [Juglans regia]

MR8G000677.1 XP\_015887788.1//PREDICTED: 24-methylenesterol C-methyltransferase 2 [Ziziphus jujuba]

MR4G024559.1 XP\_018848220.1//PREDICTED: protein PAT1 homolog 1 isoform X1 [Juglans regia]

MR7G011595.1 XP\_018847836.1//PREDICTED: probable receptor-like serine/threonine-protein kinase At4g34500 [Juglans regia]

MR4G026702.1 XP\_002304382.1//ankyrin repeat family protein [Populus trichocarpa];XP\_018808658.1//PREDICTED: protein phosphatase 1 regulatory subunit 12C-like [Juglans regia]

MR4G026757.1 XP\_018828995.1//PREDICTED: ER membrane protein complex subunit 10 [Juglans regia]

MR6G009339.2 XP\_018821342.1//PREDICTED: somatic embryogenesis receptor kinase 2 [Juglans regia];XP\_015886099.1//PREDICTED: somatic embryogenesis receptor kinase 2 [Ziziphus jujuba]

MR4G016026.1 XP\_018827313.1//PREDICTED: renalase isoform X2 [Juglans regia]

MR4G016027.1 XP\_018827386.1//PREDICTED: putative serine/threonine-protein kinase isoform X5 [Juglans regia];XP\_021663709.1//disease resistance protein At4g27190-like [Hevea brasiliensis]

MR7G002569.1 XP\_012082985.1//AP-4 complex subunit epsilon [Jatropha curcas];XP\_018834253.1//PREDICTED: AP-4 complex subunit epsilon-like [Juglans regia]

MR8G015375.1 XP\_012446789.1//PREDICTED: BTB/POZ domain-containing protein At2g24240 [Gossypium raimondii];XP\_010265605.1//PREDICTED: BTB/POZ domain-containing protein At2g24240-like [Nelumbo nucifera];KVI11713.1//BTB/POZ fold [Cynara cardunculus var. scolymus]

MR6G004352.1 XP\_018829296.1//PREDICTED: glutamate--tRNA ligase, chloroplastic/mitochondrial [Juglans regia]

MR6G010787.1 XP\_018827798.1//PREDICTED: uncharacterized protein LOC108996383 [Juglans regia]

MR6G013343.1 XP\_002310569.2//hypothetical protein POPTR\_0007s05580g [Populus trichocarpa];XP\_018850797.1//PREDICTED: uncharacterized protein LOC109013234 isoform X1 [Juglans regia]

MR6G015490.1 XP\_018848760.1//PREDICTED: long chain acyl-CoA synthetase 8 [Juglans regia]

MR3G023792.1 ONH90192.1//hypothetical protein PRUPE\_8G039700 [Prunus persica]

MR8G006644.2 XP\_018843120.1//PREDICTED: uncharacterized protein C9orf78 [Juglans regia]

MR4G021008.1 XP\_018859977.1//PREDICTED: transcription factor GTE10-like isoform X2 [Juglans regia];XP\_018859976.1//PREDICTED: transcription factor GTE10-like isoform X1 [Juglans regia]

MR5G024527.1 XP\_018840271.1//PREDICTED: 60S ribosomal protein L26-1 [Juglans regia]

MR4G016475.1 XP\_018860745.1//PREDICTED: putative invertase inhibitor [Juglans regia]

MR4G021134.1 OWM71998.1//hypothetical protein CDL15\_Pgr017881 [Punica granatum];XP\_018811956.1//PREDICTED: replication factor C subunit 2 [Juglans regia]

MR8G027539.1 XP\_018848181.1//PREDICTED: eukaryotic translation initiation factor 5B [Juglans regia]

MR3G012293.1 XP\_018830097.1//PREDICTED: exocyst complex component SEC10-like [Juglans regia]

MR5G003521.1 XP\_021608313.1//ATP-dependent DNA helicase 2 subunit KU70 isoform X2 [Manihot esculenta];XP\_008222687.1//PREDICTED: ATP-dependent DNA helicase 2 subunit KU70 [Prunus mume];XP\_018815795.1//PREDICTED: ATP-dependent DNA helicase 2 subunit KU70 [Juglans regia]

MR0G003829.1 XP\_018845643.1//PREDICTED: peroxidase 16-like [Juglans regia]

MR0G008593.1 XP\_002866062.1//tryptophan synthase beta chain 1, chloroplastic [Arabidopsis lyrata subsp. lyrata]

MR8G004610.1 XP\_018847629.1//PREDICTED: bifunctional 3-dehydroquinate dehydratase/shikimate dehydrogenase, chloroplastic-like [Juglans regia]

MR0G006545.2 XP\_018837765.1//PREDICTED: endoplasmic homolog [Juglans regia]

MR8G012806.1 XP\_018814709.1//PREDICTED: serine/threonine-protein kinase HT1-like [Juglans regia]

MR8G023204.1 XP\_017981486.1//PREDICTED: protein SPIRRIG isoform X1 [Theobroma cacao]

MR0G003764.1 XP\_018838089.1//PREDICTED: VIN3-like protein 1 isoform X1 [Juglans regia]

MR7G011382.1 XP\_018842032.1//PREDICTED: thiamine biosynthetic bifunctional enzyme TH1, chloroplastic isoform X1 [Juglans regia]

MR4G001651.1 XP\_018809368.1//PREDICTED: RING-H2 finger protein ATL79-like [Juglans regia]

MR7G014383.1 XP\_018808415.1//PREDICTED: protein PHYLLLO, chloroplastic isoform X2 [Juglans regia];KVI10176.1//Cyclic nucleotide-binding domain-containing protein [Cynara cardunculus var. scolymus];XP\_018810782.1//PREDICTED: cyclic nucleotide-gated ion channel 1-like [Juglans regia];XP\_016686050.1//PREDICTED: cyclic nucleotide-gated ion channel 1-like [Gossypium hirsutum];XP\_018808414.1//PREDICTED: protein PHYLLLO, chloroplastic isoform X1 [Juglans regia]

MR6G005851.1 XP\_018833268.1//PREDICTED: glucose-1-phosphate adenylyltransferase small subunit, chloroplastic/amyloplastic [Juglans regia]

MR4G025821.1 XP\_018811143.1//PREDICTED: uncharacterized protein LOC108983821 isoform X2 [Juglans regia];XP\_018811137.1//PREDICTED: uncharacterized protein LOC108983821 isoform X1 [Juglans regia]

MR4G024555.1 XP\_021634866.1//protein Iojap, chloroplastic [Manihot esculenta];XP\_018809326.1//PREDICTED: protein Iojap, chloroplastic-like [Juglans regia];GAV64110.1//Oligomerisation domain-containing protein [Cephalotus follicularis]

MR5TCONS\_00064307.1 KCW83875.1//hypothetical protein EUGRSUZ\_B00733 [Eucalyptus grandis]

MR6G003889.1 XP\_018840689.1//PREDICTED: sterol 3-beta-glucosyltransferase UGT80A2-like [Juglans regia];XP\_015892518.1//PREDICTED: sterol 3-beta-glucosyltransferase UGT80A2 [Ziziphus jujuba];XP\_018820333.1//PREDICTED: sterol 3-beta-glucosyltransferase UGT80A2 isoform X1 [Juglans regia]

MR4G009608.1 XP\_018856515.1//PREDICTED: uncharacterized protein LOC109018784 [Juglans regia]

MR6G011311.1 XP\_018827335.1//PREDICTED: fructokinase-1 [Juglans regia]

MR6G013295.1 XP\_018857294.1//PREDICTED: uncharacterized protein LOC109019461 [Juglans regia]

MR7G014401.1 XP\_018848214.1//PREDICTED: rust resistance kinase Lr10-like [Juglans regia]

MR4G021009.1 XP\_018814780.1//PREDICTED: 3-oxoacyl-[acyl-carrier-protein] reductase 4 isoform X2 [Juglans regia];XP\_018859977.1//PREDICTED: transcription factor GTE10-like isoform X2 [Juglans regia]

MR3G026510.1 XP\_018823517.1//PREDICTED: plastidic ATP/ADP-transporter-like [Juglans regia];XP\_018827865.1//PREDICTED: root phototropism protein 3-like [Juglans regia]

MR8G002778.1 XP\_018833461.1//PREDICTED: putative ER lumen protein-retaining receptor C28H8.4 isoform X2 [Juglans regia];XP\_018833452.1//PREDICTED: probable alkaline/neutral invertase B [Juglans regia]

MR5G002858.1 XP\_018830233.1//PREDICTED: uncharacterized protein LOC108998196 [Juglans regia];XP\_018826337.1//PREDICTED: uncharacterized protein LOC108995260 isoform X2 [Juglans regia]

MR4G020624.1 XP\_018847734.1//PREDICTED: GPI transamidase component PIG-T [Juglans regia]

MR6G006417.1 XP\_018838033.1//PREDICTED: beta-hexosaminidase 3 [Juglans regia]

MR5G003466.1 XP\_018815757.1//PREDICTED: phosphoglucan, water dikinase, chloroplastic isoform X1 [Juglans regia]

MR5G024481.1 XP\_018844184.1//PREDICTED: thiol protease aleurain-like [Juglans regia]

MR4G028683.1 XP\_018806922.1//PREDICTED: AT-hook motif nuclear-localized protein 8-like [Juglans regia]

MR6G018059.1 XP\_018834126.1//PREDICTED: uncharacterized protein LOC109001335 [Juglans regia]

MR3G011044.1 XP\_018814811.1//PREDICTED: ras-related protein RABA3 [Juglans regia]

MR6G025936.1 XP\_018857876.1//PREDICTED: mediator of RNA polymerase II transcription subunit 17-like [Juglans regia];KRH14114.1//hypothetical protein GLYMA\_14G007400 [Glycine max]

MR3G009348.1 XP\_018809497.1//PREDICTED: probable arabinosyltransferase ARAD1 [Juglans regia]

MR6G021566.1 XP\_018816897.1//PREDICTED: putative lipid phosphate phosphatase 3, chloroplastic isoform X2 [Juglans regia];XP\_018816896.1//PREDICTED: lipid phosphate phosphatase 2-like isoform X1 [Juglans regia];XP\_018816899.1//PREDICTED: putative lipid phosphate phosphatase 3, chloroplastic isoform X4 [Juglans regia]

MR6G019772.1 XP\_018815843.1//PREDICTED: 21 kDa protein-like [Juglans regia]

MR6G021434.2 XP\_018846355.1//PREDICTED: probable polyamine oxidase 4 [Juglans regia]

MR6G021455.1 XP\_018816578.1//PREDICTED: universal stress protein PHOS34 [Juglans regia]

MR3G014742.1 XP\_018814519.1//PREDICTED: peptidyl-prolyl cis-trans isomerase FKBP20-1 [Juglans regia]

MR3G014770.1 XP\_018810496.1//PREDICTED: BTB/POZ and MATH domain-containing protein 3-like isoform X1 [Juglans regia];XP\_018821781.1//PREDICTED: BTB/POZ and MATH domain-containing protein 3-like [Juglans regia]

MR6G013865.1 XP\_018846455.1//PREDICTED: uncharacterized protein LOC109010170 isoform X2 [Juglans regia]

MR7G013561.1 XP\_018855154.1//PREDICTED: anthocyanidin 3-O-glucosyltransferase 7-like [Juglans regia]

MR6G013864.1 XP\_018850833.1//PREDICTED: aspartic proteinase-like protein 1 isoform X1 [Juglans regia]

MR7G011439.1 XP\_018835593.1//PREDICTED: uncharacterized protein LOC109002347 [Juglans regia]

MR7G028529.1 XP\_018817793.1//PREDICTED: polyadenylate-binding protein 8-like [Juglans regia]

MR4G008743.1 XP\_018809325.1//PREDICTED: UDP-arabinopyranose mutase 1-like isoform X2 [Juglans regia];XP\_002283867.1//PREDICTED: UDP-arabinopyranose mutase 1 isoform X2 [Vitis vinifera]

MR4G023616.1 AIX92145.1//cinnamoyl-CoA reductase 1 [Betula platyphylla]

MR6G011277.1 XP\_018827345.1//PREDICTED: tryptophan synthase alpha chain-like isoform X1 [Juglans regia]

MR7G016687.1 XP\_018809512.1//PREDICTED: cyclic nucleotide-gated ion channel 1-like [Juglans regia]

MR4G021018.2 XP\_018808074.1//PREDICTED: uncharacterized protein LOC108981385 [Juglans regia]

MR5G027232.1 XP\_006424909.1//hypothetical protein CICLE\_v10029051mg [Citrus clementina];XP\_015874042.1//PREDICTED: tropinone reductase homolog At5g06060-like [Ziziphus jujuba]

MR3G026575.1 XP\_018850654.1//PREDICTED: uncharacterized protein LOC109013126 [Juglans regia]

MR2G022146.2 XP\_018828020.1//PREDICTED: cation-chloride cotransporter 1-like [Juglans regia];KMZ57105.1//Solute carrier family 12 member [Zostera marina]

MR5G023182.1 XP\_018826140.1//PREDICTED: endo-1,3;1,4-beta-D-glucanase-like isoform X1 [Juglans regia]

MR3G019030.1 XP\_018833902.1//PREDICTED: cytochrome c oxidase subunit 6b-1-like isoform X2 [Juglans regia]

MR2G026847.2 XP\_018824705.1//PREDICTED: acetylornithine deacetylase [Juglans regia];XP\_021669905.1//mitochondrial carnitine/acylcarnitine carrier-like protein [Hevea brasiliensis]

MR2G027137.1 XP\_021276261.1//mitochondrial amidoxime reducing component 2 [Herrania umbratica];XP\_018812726.1//PREDICTED: mitochondrial amidoxime-reducing component 1-like [Juglans regia]

MR4G021054.1 XP\_018833335.1//PREDICTED: rhodanese-like domain-containing protein 11, chloroplastic [Juglans regia]

MR4G021195.1 XP\_018859335.1//PREDICTED: DEAD-box ATP-dependent RNA helicase 35 [Juglans regia]

MR6G021656.1 XP\_018834126.1//PREDICTED: uncharacterized protein LOC109001335 [Juglans regia]

MR6G009128.1 XP\_021275482.1//signal peptide peptidase-like 1 [Herrania umbratica]

MR3G009415.1 XP\_008388058.1//PREDICTED: 3-ketoacyl-CoA synthase 4-like [Malus domestica]

MR2G027161.1 XP\_018809112.1//PREDICTED: binding partner of ACD11 1-like [Juglans regia]

MR4G023305.1 XP\_018810168.1//PREDICTED: AP-4 complex subunit epsilon-like [Juglans regia]

MR3G007323.2 XP\_006493466.1//PREDICTED: uncharacterized protein C1450.15 [Citrus sinensis];XP\_018827956.1//PREDICTED: glycosylphosphatidylinositol anchor biosynthesis protein 11-like isoform X1 [Juglans regia];XP\_015868139.1//PREDICTED: uncharacterized protein C1450.15 [Ziziphus jujuba]

MR0G006163.1 XP\_018818342.1//PREDICTED: DNA-directed RNA polymerase III subunit 2 isoform X1 [Juglans regia];XP\_018818353.1//PREDICTED: DNA-directed RNA polymerase III subunit 2 isoform X2 [Juglans regia];XP\_010659064.1//PREDICTED: DNA-directed RNA polymerase III subunit 2 [Vitis vinifera];OMO61172.1//hypothetical protein CCACVL1\_23713 [Corchorus capsularis]

MR0G007458.1 XP\_018806479.1//PREDICTED: cadmium-induced protein AS8 isoform X4 [Juglans regia];XP\_018806472.1//PREDICTED: cadmium-induced protein AS8 isoform X2 [Juglans regia]

MR6G020537.1 XP\_018859353.1//PREDICTED: calcium-transporting ATPase 9, plasma membrane-type-like isoform X1 [Juglans regia];XP\_018859237.1//PREDICTED: calcium-transporting ATPase 9, plasma membrane-type-like isoform X1 [Juglans regia]

MR6G013315.1 XP\_018843111.1//PREDICTED: TMV resistance protein N-like isoform X1 [Juglans regia]

MR6G003659.1 GAV68459.1//Thiolase\_N domain-containing protein/Thiolase\_C domain-containing protein/ABC1 domain-containing protein [Cephalotus follicularis];XP\_018848751.1//PREDICTED: acetyl-CoA acetyltransferase, cytosolic 1 isoform X2 [Juglans regia]

MR7G024251.1 XP\_018815059.1//PREDICTED: uncharacterized protein LOC108986773 [Juglans regia]

MR4G028678.1 XP\_018824669.1//PREDICTED: protein LE25 [Juglans regia]

MR7G008316.1 XP\_018833412.1//PREDICTED: cation/calcium exchanger 2 [Juglans regia]

MR5G025131.1 XP\_018835514.1//PREDICTED: glutelin type-A 3-like [Juglans regia]

MR5G002859.1 XP\_018826334.1//PREDICTED: STS14 protein [Juglans regia]

MR5G010483.1 GAV57497.1//LRR\_1 domain-containing protein/NB-ARC domain-containing protein [Cephalotus follicularis]

MR8G002615.1 XP\_018833608.1//PREDICTED: phosphoinositide phosphatase SAC1 isoform X2 [Juglans regia];XP\_018833609.1//PREDICTED: phosphoinositide phosphatase SAC1 isoform X3 [Juglans regia]

MR8G001626.1 XP\_018831155.1//PREDICTED: uncharacterized protein LOC108998873 [Juglans regia]

MR7G009259.2 XP\_018840622.1//PREDICTED: uncharacterized protein LOC109005956 isoform X1 [Juglans regia];XP\_018840630.1//PREDICTED: uncharacterized protein LOC109005956 isoform X2 [Juglans regia]

MR4G004748.1 XP\_018810169.1//PREDICTED: decapping nuclease DXO homolog, chloroplastic isoform X1 [Juglans regia]

MR2G019459.1 XP\_018816499.1//PREDICTED: importin subunit alpha-4 [Juglans regia]

MR2G000623.1 XP\_018852310.1//PREDICTED: protein MODIFIER OF SNC1 11-like [Juglans regia]

MR2G004713.1 XP\_018836272.1//PREDICTED: cell division cycle protein 48 homolog [Juglans regia]

MR2G006160.1 XP\_018816513.1//PREDICTED: pentatricopeptide repeat-containing protein At1g56690, mitochondrial [Juglans regia];XP\_018816409.1//PREDICTED: GDSL esterase/lipase At1g09390 [Juglans regia]

MR2G009995.1 XP\_018819401.1//PREDICTED: WEB family protein At2g38370 [Juglans regia]

MR2G011703.1 XP\_018820571.1//PREDICTED: transcription initiation factor TFIID subunit 8 [Juglans regia]

MR2G011723.1 XP\_018820571.1//PREDICTED: transcription initiation factor TFIID subunit 8 [Juglans regia]

MR2G012442.1 XP\_018811980.1//PREDICTED: kinetochore protein spc25 [Juglans regia]

MR2G013617.1 XP\_009113912.1//PREDICTED: alpha N-terminal protein methyltransferase 1-like [Brassica rapa];XP\_018813602.1//PREDICTED: alpha N-terminal protein methyltransferase 1 isoform X1 [Juglans regia]

MR2G004727.1 XP\_018855383.1//PREDICTED: thiol-disulfide oxidoreductase LTO1-like [Juglans regia]

MR2G005420.4 XP\_018859537.1//PREDICTED: la-related protein 6A [Juglans regia]

MR2G006162.1 XP\_018816409.1//PREDICTED: GDSL esterase/lipase At1g09390 [Juglans regia]

MR2G006842.1 XP\_018824515.1//PREDICTED: 40S ribosomal protein S4-1-like [Juglans regia]

MR1G028360.1 XP\_018859181.1//PREDICTED: uncharacterized protein LOC109021088 [Juglans regia]

MR1TCONS\_00054219.1 MR1TCONS\_00054219.1//1;XP\_018835437.1//PREDICTED: putative disease resistance protein At3g14460 isoform X1 [Juglans regia];XP\_017984378.1//PREDICTED: putative disease resistance RPP13-like protein 1 [Theobroma cacao]

MR3G019174.2 XP\_018858836.1//PREDICTED: GRF1-interacting factor 3-like [Juglans regia]

MR2G012857.1 XP\_018832807.1//PREDICTED: velvet complex subunit B [Juglans regia]

MR2G022150.1 XP\_018828022.1//PREDICTED: BTB/POZ domain-containing protein At1g30440 [Juglans regia]

MR2G023480.1 XP\_018817223.1//PREDICTED: pyrroline-5-carboxylate reductase [Juglans regia];XP\_015898143.1//PREDICTED: pyrroline-5-carboxylate reductase-like isoform X1 [Ziziphus jujuba]

MR3G011046.1 XP\_018814811.1//PREDICTED: ras-related protein RABA3 [Juglans regia]

MR3G011007.1 XP\_018807798.1//PREDICTED: uncharacterized protein LOC108981167 [Juglans regia]

MR1G027563.1 XP\_018818917.1//PREDICTED: UMP-CMP kinase 3-like isoform X1 [Juglans regia];XP\_018818963.1//PREDICTED: UMP-CMP kinase 3-like isoform X2 [Juglans regia];XP\_015886496.1//PREDICTED: UMP-CMP kinase 3 isoform X1 [Ziziphus jujuba];XP\_019449659.1//PREDICTED: UMP-CMP kinase 3-like [Lupinus angustifolius]

MR1G019986.1 XP\_009350240.1//PREDICTED: pentatricopeptide repeat-containing protein At1g62350 [Pyrus x bretschneideri];XP\_018825515.1//PREDICTED: pentatricopeptide repeat-containing protein At1g62350 [Juglans regia]

MR6G023574.1 XP\_018850816.1//PREDICTED: protein UPSTREAM OF FLC [Juglans regia]

MR6G013317.5 XP\_018835437.1//PREDICTED: putative disease resistance protein At3g14460 isoform X1 [Juglans regia];XP\_018826305.1//PREDICTED: TMV resistance protein N-like [Juglans regia]

MR6G001701.1 XP\_018820691.1//PREDICTED: protein S-acyltransferase 24 [Juglans regia]

MR4G021194.1 XP\_018847359.1//PREDICTED: probable LRR receptor-like serine/threonine-protein kinase At1g12460 [Juglans regia]

MR4G001417.1 XP\_015866027.1//PREDICTED: 65-kDa microtubule-associated protein 1 [Ziziphus jujuba];XP\_018812214.1//PREDICTED: 65-kDa microtubule-associated protein 1-like [Juglans regia]

MR4G003859.1 XP\_018826580.1//PREDICTED: uncharacterized endoplasmic reticulum membrane protein YGL010W-like [Juglans regia]

MR4G015417.1 XP\_018852245.1//PREDICTED: lysine-specific demethylase MJ706-like [Juglans regia]

MR4G010943.1 XP\_018842632.1//PREDICTED: tobamovirus multiplication protein 2B-like isoform X2 [Juglans regia]

MR4G021021.3 XP\_018814781.1//PREDICTED: telomere length regulation protein TEL2 homolog isoform X1 [Juglans regia]

MR5G013405.1 XP\_018820989.1//PREDICTED: mannan endo-1,4-beta-mannosidase 7 [Juglans regia]

MR5G023109.1 XP\_018856419.1//PREDICTED: uncharacterized protein LOC109018719 [Juglans regia]

MR7G002567.2 XP\_018810176.1//PREDICTED: decapping 5-like protein [Juglans regia]

MR5G003421.1 XP\_018844047.1//PREDICTED: crocetin glucosyltransferase, chloroplastic-like [Juglans regia]

MR5G003282.1 OWM66251.1//hypothetical protein CDL15\_Pgr013468 [Punica granatum];XP\_004288038.2//PREDICTED: caltractin [Fragaria vesca subsp. vesca]

**Table S16.** List of primers used for qRT-PCR.

| Gene name           | Forward primer sequence (5'-3') | Reverse primer sequence (5'-3') |
|---------------------|---------------------------------|---------------------------------|
| <i>Actin</i>        | AGCCTACATCGCTCTGGACT            | GTGGTTTCGTGTATGCCAGC            |
| MR4G016016.1        | AGCTCTGAGTCTCTTTCGCA            | CCACGTGAGGTTTAGCTTCG            |
| MR4G025315.1        | CATTAGTCACTGCCGTCACG            | ATTCTCTCTCGCCATCCTCG            |
| MR6G025594.1        | CCGGCGGAGTAGTTTACAGA            | ACCCAAGTCCAAGACGATA             |
| MR1G012865.1        | TGTTGATCCCTACATTGTAGTGG         | AAGAGCCGGATCAACATCGA            |
| MR2G007342.1        | ATGTCAGAGAAGCAACCCCA            | GCCAAGGATCACAACGACAG            |
| MR2G011842.1        | TGAAACAGGCTACCACCACT            | TTCACACTGGGGTCAATTGG            |
| MR3G015028.1        | GAGGTGCTATCAGAGGCCAT            | CACCTGATCCTGGAGCAAGA            |
| MR5G022585.3        | TACAACACTCCCCAAACCCA            | AGAGGAGAAGAGCGAACACC            |
| MR5TCONS_00064963.1 | GATCTCACCCACCTCACCTC            | GCCACAGCGACACAAAAGTA            |
| MR0TCONS_00017483.1 | ACTACTACCCCTACTGCCCA            | AACCAACTCCCACCGTACTT            |
